# Supplementary material for: Recent Applications of Artificial Intelligence in Radiotherapy: Where We Are and Beyond
Source: MDPI journal article supplement (doi:10.3390/app12073223), 2022-03-22
Supplement: s1 [file s1]

**Table S1.** List of included papers for quantitative evaluation and their classification according to the study main aims and AI subgroups (i.e., type of methods).

| Ref  | Type | Year | Title                                                                                                                                                                                         | Main aims                   |
|------|------|------|-----------------------------------------------------------------------------------------------------------------------------------------------------------------------------------------------|-----------------------------|
| [10] | ML   | 2021 | Implementation of the Australian Computer-Assisted Theragnostics (AusCAT) network for radiation oncology data extraction, reporting and distributed learning                                  | Patient care and management |
| [12] | DL   | 2019 | Learning deep similarity metric for 3D MR-TRUS image registration                                                                                                                             | Image registration          |
| [13] | DL   | 2018 | Deep Learning based Inter-Modality Image Registration Supervised by Intra-Modality Similarity                                                                                                 | Image registration          |
| [16] | ML   | 2020 | Lasso logistic regression to derive workflow-specific algorithm performance requirements as demonstrated for head and neck cancer deformable image registration in adaptive radiation therapy | Adaptive Planning           |
| [18] | DL   | 2021 | Automated contour propagation of the prostate from pCT to CBCT images via deep unsupervised learning                                                                                          | Image registration          |
| [23] | ML   | 2018 | Early Changes in Serial CBCT-Measured Parotid Gland Biomarkers Predict Chronic Xerostomia After Head and Neck Radiation Therapy                                                               | Outcome prediction          |
| [24] | DL   | 2018 | H-DenseUNet: Hybrid Densely Connected UNet for Liver and Tumor Segmentation From CT Volumes.                                                                                                  | Image segmentation          |
| [25] | DL   | 2018 | DRINet for Medical Image Segmentation                                                                                                                                                         | Image segmentation          |
| [26] | DL   | 2018 | Fully automatic multi-organ segmentation for head and neck cancer radiotherapy using shape representation model constrained fully convolutional neural networks                               | Image segmentation          |
| [27] | DL   | 2019 | Shape constrained fully convolutional DenseNet with adversarial training for multiorgan segmentation on head and neck CT and low-field MR images                                              | Image segmentation          |
| [29] | DL   | 2021 | Clinical implementation of artificial intelligence-driven cone-beam computed tomography-guided online adaptive radiotherapy in the pelvic region                                              | Adaptive Planning           |
| [30] | ML   | 2020 | Automated contouring and planning pipeline for hippocampal-avoidant whole-brain radiotherapy                                                                                                  | Image segmentation          |
| [31] | DL   | 2021 | Deep learning-based automatic delineation of the hippocampus by MRI: geometric and dosimetric evaluation                                                                                      | Image segmentation          |
| [32] | DL   | 2020 | Head and neck multi-organ auto-segmentation on CT images aided by synthetic MRI.                                                                                                              | Synthetic image generation  |
| [33] | DL   | 2021 | Preliminary Experience of Implementing Deep-Learning Based Auto-Segmentation in Head and Neck Cancer: A Study on Real-World Clinical Cases                                                    | Image segmentation          |
| [37] | DL   | 2020 | Strategies to improve deep learning-based salivary gland segmentation                                                                                                                         | Image segmentation          |
| [38] | DL   | 2021 | Clinically applicable segmentation of head and neck anatomy for radiotherapy: Deep learning algorithm development and validation study                                                        | Image segmentation          |
| [42] | DL   | 2020 | Automated Quality Assurance of OAR Contouring for Lung Cancer Based on Segmentation With Deep Active Learning                                                                                 | Image segmentation          |

|      |    |      |                                                                                                                                                                      |                            |
|------|----|------|----------------------------------------------------------------------------------------------------------------------------------------------------------------------|----------------------------|
| [43] | DL | 2021 | A 2D–3D hybrid convolutional neural network for lung lobe auto-segmentation on standard slice thickness computed tomography of patients receiving radiotherapy       | Image segmentation         |
| [45] | DL | 2020 | Generalization vs. Specificity: In Which Cases Should a Clinic Train its Own Segmentation Models?                                                                    | Image segmentation         |
| [46] | DL | 2021 | Automatic Segmentation of Clinical Target Volumes for Post-Modified Radical Mastectomy Radiotherapy Using Convolutional Neural Networks                              | Image segmentation         |
| [48] | ML | 2018 | Abdominal, multi-organ, auto-contouring method for online adaptive magnetic resonance guided radiotherapy: An intelligent, multi-level fusion approach               | Image segmentation         |
| [49] | IO | 2021 | An Artificial Intelligence-Based Full-Process Solution for Radiotherapy: A Proof of Concept Study on Rectal Cancer                                                   | Treatment planning         |
| [51] | DL | 2020 | Auto-segmentations by convolutional neural network in cervical and anorectal cancer with clinical structure sets as the ground truth                                 | Image segmentation         |
| [52] | DL | 2021 | Clinical implementation of deep learning contour autosegmentation for prostate radiotherapy                                                                          | Image segmentation         |
| [53] | DL | 2021 | Deep learning-based auto-segmentation of clinical target volumes for radiotherapy treatment of cervical cancer                                                       | Image segmentation         |
| [54] | ML | 2021 | Varian ethos online adaptive radiotherapy for prostatecancer: Early results of contouring accuracy, treatmentplan quality, and treatment time                        | Adaptive Planning          |
| [70] | ML | 2021 | Radiomics classifier to quantify automatic segmentation quality of cardiac sub-structures for radiotherapy treatment planning                                        | Image segmentation         |
| [71] | DL | 2021 | Using Spatial Probability Maps to Highlight Potential Inaccuracies in Deep Learning-Based Contours: Facilitating Online Adaptive Radiation Therapy                   | Image segmentation         |
| [72] | DL | 2021 | Investigating the potential of deep learning for patient-specific quality assurance of salivary gland contours using EORTC-1219-DAHANCA-29 clinical trial data       | Image segmentation         |
| [73] | DL | 2018 | Dose evaluation of fast synthetic-CT generation using a generative adversarial network for general pelvis MR-only radiotherapy                                       | Synthetic image generation |
| [74] | DL | 2020 | Comparison of CBCT-based dose calculation methods in head and neck cancer radiotherapy: from Hounsfield unit to density calibration curve to deep learning           | Synthetic image generation |
| [78] | DL | 2017 | MR-based synthetic CT generation using a deep convolutional neural network method.                                                                                   | Synthetic image generation |
| [79] | DL | 2019 | A preliminary study of using a deep convolution neural network to generate synthesized CT images based on CBCT for adaptive radiotherapy of nasopharyngeal carcinoma | Synthetic image generation |
| [80] | DL | 2020 | RealDRR - Rendering of realistic digitally reconstructed radiographs using locally trained image-to-image translation                                                | Synthetic image generation |
| [81] | DL | 2020 | A new deep convolutional neural network design with efficient learning capability: Application to CT image synthesis from MRI                                        | Synthetic image generation |
| [82] | DL | 2020 | Deep learning-based synthetic CT generation for paediatric brain MR-only photon and proton radiotherapy                                                              | Treatment planning         |
| [83] | DL | 2021 | Deep learning-based volumetric image generation from projection imaging for prostate radiotherapy                                                                    | Synthetic image generation |

|       |    |      |                                                                                                                                                                                 |                            |
|-------|----|------|---------------------------------------------------------------------------------------------------------------------------------------------------------------------------------|----------------------------|
| [84]  | DL | 2020 | X-ray2Shape: Reconstruction of 3D Liver Shape from a Single 2D Projection Image                                                                                                 | Synthetic image generation |
| [85]  | DL | 2020 | A deep learning approach to generate synthetic CT in low field MR-guided adaptive radiotherapy for abdominal and pelvic cases                                                   | Synthetic image generation |
| [87]  | IO | 2021 | Personalized automation of treatment planning in head-neck cancer: A step forward for quality in radiation therapy?                                                             | Treatment planning         |
| [88]  | DL | 2020 | Artificial intelligence-based radiotherapy machine parameter optimization using reinforcement learning                                                                          | Treatment planning         |
| [90]  | IO | 2021 | Challenges in lung and heart avoidance for postmastectomy breast cancer radiotherapy: Is automated planning the answer?                                                         | Treatment planning         |
| [91]  | DL | 2018 | Cone Beam Computed Tomography Image Quality Improvement Using a Deep Convolutional Neural Network                                                                               | Patient positioning        |
| [92]  | DL | 2020 | Feasibility of image quality improvement for high-speed CBCT imaging using deep convolutional neural network for image-guided radiotherapy in prostate cancer                   | Patient positioning        |
| [93]  | DL | 2018 | Markerless Respiratory Tumor Motion Prediction Using an Adaptive Neuro-fuzzy Approach                                                                                           | Motion                     |
| [94]  | DL | 2020 | Development and evaluation of a deep learning based artificial intelligence for automatic identification of gold fiducial markers in an MRI-only prostate radiotherapy workflow | Patient positioning        |
| [95]  | DL | 2020 | Real-time markerless tumour tracking with patient-specific deep learning using a personalised data generation strategy: Proof of concept by phantom study                       | Motion                     |
| [101] | IO | 2021 | Toward automation of initial chart check for photon/electron EBRT: the clinical implementation of new AAPM task group reports and automation techniques                         | Images and chart review    |
| [103] | ML | 2020 | An artificial neural network to model response of a radiotherapy beam monitoring system                                                                                         | Plan and machine QA        |
| [104] | ML | 2019 | Characterization of a Bayesian network-based radiotherapy plan verification model                                                                                               | Plan and machine QA        |
| [105] | ML | 2020 | An Artificial Intelligence Model for Predicting 1-Year Survival of Bone Metastases in Non-Small-Cell Lung Cancer Patients Based on XGBoost Algorithm                            | Outcome prediction         |
| [106] | ML | 2019 | Radiomics Model to Predict Early Progression of Nonmetastatic Nasopharyngeal Carcinoma after Intensity Modulation Radiation Therapy: A Multicenter Study                        | Outcome prediction         |
| [110] | DL | 2021 | AI-Based Radiation Dose Quantification for Estimation of Heart Disease Risk in Breast Cancer Survivors After Radiation Therapy                                                  | Outcome prediction         |
| [111] | ML | 2019 | A machine learning approach for identifying gene biomarkers guiding the treatment of breast cancer                                                                              | Outcome prediction         |
| [112] | ML | 2021 | Strategies to develop radiomics and machine learning models for lung cancer stage and histology prediction using small data samples                                             | Outcome prediction         |
| [113] | ML | 2021 | A prediction model for degree of differentiation for resectable locally advanced esophageal squamous cell carcinoma based on CT images using radiomics and machine-learning     | Outcome prediction         |
| [115] | ML | 2019 | Imaging-Based Individualized Response Prediction Of Carbon Ion Radiotherapy For Prostate Cancer Patients                                                                        | Outcome prediction         |
| [116] | DL | 2021 | The use of deep learning on endoscopic images to assess the response of rectal cancer after chemoradiation                                                                      | Outcome prediction         |
| [117] | ML | 2019 | Computed Tomography-based Radiomics for Risk Stratification in Prostate Cancer                                                                                                  | Outcome prediction         |

|       |    |      |                                                                                                                                                                                                               |                    |
|-------|----|------|---------------------------------------------------------------------------------------------------------------------------------------------------------------------------------------------------------------|--------------------|
| [118] | ML | 2021 | Machine learning and statistical prediction of patient quality-of-life after prostate radiation therapy                                                                                                       | Outcome prediction |
| [119] | ML | 2018 | A prediction model for early death in non-small cell lung cancer patients following curative-intent chemoradiotherapy                                                                                         | Outcome prediction |
| [120] | ML | 2019 | Supervised machine-learning enables segmentation and evaluation of heterogeneous post-treatment changes in multi-parametric mri of soft-tissue sarcoma                                                        | Image segmentation |
| [121] | ML | 2019 | Development of a Machine Learning Model for Optimal Applicator Selection in High-Dose-Rate Cervical Brachytherapy                                                                                             | Outcome prediction |
| [122] | ML | 2018 | Unsupervised machine learning of radiomic features for predicting treatment response and overall survival of early stage non-small cell lung cancer patients treated with stereotactic body radiation therapy | Outcome prediction |
| [140] | DL | 2018 | MR-Only Brain Radiation Therapy: Dosimetric Evaluation of Synthetic CTs Generated by a Dilated Convolutional Neural Network                                                                                   | Adaptive planning  |
| [141] | DL | 2019 | MRI super-resolution reconstruction for MRI-guided adaptive radiotherapy using cascaded deep learning: In the presence of limited training data and unknown translation model                                 | Adaptive planning  |
| [142] | DL | 2019 | Toward predicting the evolution of lung tumors during radiotherapy observed on a longitudinal MR imaging study via a deep learning algorithm                                                                  | Adaptive planning  |
| [143] | DL | 2019 | Segmenting lung tumors on longitudinal imaging studies via a patient-specific adaptive convolutional neural network                                                                                           | Adaptive planning  |
| [144] | ML | 2019 | Learning-based CBCT correction using alternating random forest based on auto-context model                                                                                                                    | Adaptive planning  |
| [145] | DL | 2020 | A deep learning-based method for predicting volumes of nasopharyngeal carcinoma for adaptive radiation therapy treatment                                                                                      | Adaptive planning  |
| [146] | DL | 2020 | Unsupervised learning for deformable registration of thoracic CT and cone-beam CT based on multiscale features matching with spatially adaptive weighting                                                     | Adaptive planning  |
| [147] | DL | 2020 | Patient-Specific Finetuning of Deep Learning Models for Adaptive Radiotherapy in Prostate CT                                                                                                                  | Adaptive planning  |
| [148] | DL | 2020 | Learning deformable image registration with structure guidance constraints for adaptive radiotherapy                                                                                                          | Adaptive planning  |
| [149] | DL | 2020 | Longitudinal Prediction of Radiation-Induced Anatomical Changes of Parotid Glands During Radiotherapy Using Deep Learning                                                                                     | Adaptive planning  |
| [150] | DL | 2020 | Unsupervised Cone-Beam Artifact Removal Using CycleGAN and Spectral Blending for Adaptive Radiotherapy                                                                                                        | Adaptive planning  |
| [151] | DL | 2020 | Dose distribution correction for the influence of magnetic field using a deep convolutional neural network for online MR-guided adaptive radiotherapy                                                         | Adaptive planning  |
| [152] | DL | 2020 | Developments in deep learning based corrections of cone beam computed tomography to enable dose calculations for adaptive radiotherapy                                                                        | Adaptive planning  |
| [153] | ML | 2020 | Indications of Online Adaptive Replanning Based On Organ Deformation                                                                                                                                          | Adaptive planning  |
| [154] | ML | 2020 | Prediction of the individual multileaf collimator positional deviations during dynamic IMRT delivery priori with artificial neural network                                                                    | Adaptive planning  |

|       |    |      |                                                                                                                                                                                                                                  |                              |
|-------|----|------|----------------------------------------------------------------------------------------------------------------------------------------------------------------------------------------------------------------------------------|------------------------------|
| [155] | ML | 2020 | An adversarial machine learning based approach and biomechanically-guided validation for improving deformable image registration accuracy between a planning CT and cone-beam CT for adaptive prostate radiotherapy applications | Adaptive planning            |
| [156] | ML | 2020 | Predicting spatial esophageal changes in a multimodal longitudinal imaging study via a convolutional recurrent neural network                                                                                                    | Adaptive planning            |
| [157] | DL | 2021 | Clinical Enhancement in AI-Based Post-processed Fast-Scan Low-Dose CBCT for Head and Neck Adaptive Radiotherapy                                                                                                                  | Adaptive planning            |
| [158] | DL | 2021 | Intentional deep overfit learning (IDOL): A novel deep learning strategy for adaptive radiation therapy                                                                                                                          | Adaptive Planning            |
| [159] | DL | 2021 | First experience of autonomous, un-supervised treatment planning integrated in adaptive MR-guided radiotherapy and delivered to a patient with prostate cancer                                                                   | Adaptive planning            |
| [160] | DL | 2021 | Improvement of megavoltage computed tomography image quality for adaptive helical tomotherapy using cycleGAN-based image synthesis with small datasets                                                                           | Adaptive planning            |
| [161] | DL | 2021 | Managing tumor changes during radiotherapy using a deep learning model                                                                                                                                                           | Adaptive planning            |
| [162] | DL | 2021 | Dynamic stochastic deep learning approaches for predicting geometric changes in head and neck cancer                                                                                                                             | Adaptive planning            |
| [163] | DL | 2021 | Deep learning-based deformable image registration of inter-fraction CBCT images for adaptive radiation therapy                                                                                                                   | Adaptive planning            |
| [164] | DL | 2018 | Automatic quantification of calcifications in the coronary arteries and thoracic aorta on radiotherapy planning CT scans of Western and Asian breast cancer patients                                                             | Detection and classification |
| [165] | ML | 2018 | Radio-pathomic Maps of Epithelium and Lumen Density Predict the Location of High-Grade Prostate Cancer                                                                                                                           | Detection and classification |
| [166] | ML | 2018 | Gantry angle classification with a fluence map in intensity-modulated radiotherapy for prostate cases using machine learning                                                                                                     | Detection and classification |
| [167] | ML | 2018 | A user-guided tool for semi-automated cerebral microbleed detection and volume segmentation: Evaluating vascular injury and data labelling for machine learning                                                                  | Detection and classification |
| [168] | ML | 2018 | Feasibility of anatomical feature points for the estimation of prostate locations in the Bayesian delineation frameworks for prostate cancer radiotherapy                                                                        | Detection and classification |
| [169] | ML | 2018 | Distinguishing True Progression From Radionecrosis After Stereotactic Radiation Therapy for Brain Metastases With Machine Learning and Radiomics                                                                                 | Detection and classification |
| [170] | DL | 2019 | Bone cancer identification and classification using hybrid fuzzy clustering with deep learning classification                                                                                                                    | Detection and classification |
| [171] | ML | 2019 | Classifying stage IV lung cancer from health care claims: A comparison of multiple analytic approaches                                                                                                                           | Detection and classification |
| [172] | ML | 2019 | Brain MRI classification based on machine learning framework with auto-context model                                                                                                                                             | Detection and classification |
| [173] | ML | 2019 | Application of a machine learning method to whole brain white matter injury after radiotherapy for nasopharyngeal carcinoma                                                                                                      | Detection and classification |
| [174] | DL | 2020 | Deep learning for automatic calcium scoring in CT: Validation using multiple cardiac CT and chest CT protocols                                                                                                                   | Detection and classification |
| [175] | ML | 2020 | Metabolic Fingerprinting on Synthetic Alloys for Medulloblastoma Diagnosis and Radiotherapy Evaluation                                                                                                                           | Detection and classification |
| [176] | ML | 2020 | Tissue Classification to Support Local Active Delineation of Brain Tumors                                                                                                                                                        | Detection and classification |

|       |    |      |                                                                                                                                                                              |                              |
|-------|----|------|------------------------------------------------------------------------------------------------------------------------------------------------------------------------------|------------------------------|
| [177] | ML | 2020 | Using Diffuse Reflectance Spectroscopy to Distinguish Tumor Tissue From Fibrosis in Rectal Cancer Patients as a Guide to Surgery                                             | Detection and classification |
| [178] | ML | 2020 | Patient-specific PTV margins for liver stereotactic body radiation therapy determined using support vector classification with an early warning system for margin adaptation | Detection and classification |
| [179] | ML | 2020 | Non-invasive imaging prediction of tumor hypoxia: A novel developed and externally validated CT and FDG-PET-based radiomic signatures                                        | Detection and classification |
| [180] | DL | 2021 | Automated detection of dental artifacts for large-scale radiomic analysis in radiation oncology                                                                              | Detection and classification |
| [181] | DL | 2021 | Application of Pet-CT Fusion Deep Learning Imaging in Precise Radiotherapy of Thyroid Cancer                                                                                 | Detection and classification |
| [182] | ML | 2021 | Brain tumor detection: An application based on machine learning                                                                                                              | Detection and classification |
| [183] | ML | 2021 | Stereotactic body radiation therapy for spinal metastases: A novel local control stratification by spinal region                                                             | Detection and classification |
| [184] | ML | 2021 | Differentiation of recurrent glioblastoma from radiation necrosis using diffusion radiomics with machine learning model development and external validation                  | Detection and Classification |
| [185] | ML | 2021 | Nearest Neighbor-Based Strategy to Optimize Multi-View Triplet Network for Classification of Small-Sample Medical Imaging Data                                               | Detection and classification |
| [186] | ML | 2021 | Machine learning and registration for automatic seed localization in 3D US images for prostate brachytherapy                                                                 | Detection and Classification |
| [187] | ML | 2021 | Image recognition of CT diagnosis for cholangiocarcinoma treatment based on FPGA processor and neural network                                                                | Detection and classification |
| [188] | DL | 2018 | Automated prediction of dosimetric eligibility of patients with prostate cancer undergoing intensity-modulated radiation therapy using a convolutional neural network        | Dose prediction              |
| [189] | ML | 2018 | An Ensemble Approach to Knowledge-Based Intensity-Modulated Radiation Therapy Planning                                                                                       | Dose prediction              |
| [190] | ML | 2018 | Symbolic regression and feature construction with GP-GOMEA applied to radiotherapy dose reconstruction of childhood cancer survivors                                         | Dose prediction              |
| [191] | DL | 2019 | A deep learning method for prediction of three-dimensional dose distribution of helical tomotherapy                                                                          | Dose prediction              |
| [192] | DL | 2019 | Individualized 3D dose distribution prediction using deep learning                                                                                                           | Dose prediction              |
| [193] | DL | 2019 | 3D radiotherapy dose prediction on head and neck cancer patients with a hierarchically densely connected U-net deep learning architecture                                    | Dose prediction              |
| [194] | DL | 2019 | Feasibility of CT-only 3D dose prediction for VMAT prostate plans using deep learning                                                                                        | Dose prediction              |
| [195] | ML | 2019 | Prediction of skin dose in low-kV intraoperative radiotherapy using machine learning models trained on results of in vivo dosimetry                                          | Dose prediction              |
| [196] | ML | 2019 | A convolutional neural network approach for IMRT dose distribution prediction in prostate cancer patients                                                                    | Dose prediction              |
| [197] | DL | 2020 | High quality proton portal imaging using deep learning for proton radiation therapy: A phantom study                                                                         | Dose prediction              |
| [198] | DL | 2020 | Convolutional neural network-based dosimetry evaluation of esophageal radiation treatment planning                                                                           | Dose prediction              |
| [199] | DL | 2020 | Evaluation of optimization workflow using custom-made planning through predicted dose distribution for head and neck tumor treatment                                         | Dose prediction              |

|       |    |      |                                                                                                                                                                       |                 |
|-------|----|------|-----------------------------------------------------------------------------------------------------------------------------------------------------------------------|-----------------|
| [200] | DL | 2020 | Dose prediction with deep learning for prostate cancer radiation therapy: Model adaptation to different treatment planning practices                                  | Dose prediction |
| [201] | DL | 2020 | DoseGAN: a generative adversarial network for synthetic dose prediction using attention-gated discrimination and generation                                           | Dose prediction |
| [202] | DL | 2020 | Using deep learning to model the biological dose prediction on bulky lung cancer patients of partial stereotactic ablation radiotherapy                               | Dose prediction |
| [203] | DL | 2020 | Fully automated dose prediction using generative adversarial networks in prostate cancer patients                                                                     | Dose prediction |
| [204] | DL | 2020 | Fluence Map Prediction Using Deep Learning Models – Direct Plan Generation for Pancreas Stereotactic Body Radiation Therapy                                           | Dose prediction |
| [205] | ML | 2020 | The importance of evaluating the complete automated knowledge-based planning pipeline                                                                                 | Dose prediction |
| [206] | ML | 2020 | The benefits evaluation of abdominal deep inspiration breath hold based on knowledge-based radiotherapy treatment planning for left-sided breast cancer               | Dose Prediction |
| [207] | ML | 2020 | Development and evaluation of machine learning models for voxel dose predictions in online adaptive magnetic resonance guided radiation therapy                       | Dose prediction |
| [208] | DL | 2021 | Multi-constraint generative adversarial network for dose prediction in radiotherapy                                                                                   | Dose prediction |
| [209] | DL | 2021 | Development and evaluation of radiotherapy deep learning dose prediction models for breast cancer                                                                     | Dose prediction |
| [210] | DL | 2021 | Deep learning dose prediction for IMRT of esophageal cancer: The effect of data quality and quantity on model performance                                             | Dose prediction |
| [211] | DL | 2021 | DVHnet: A deep learning-based prediction of patient-specific dose volume histograms for radiotherapy planning                                                         | Dose prediction |
| [212] | DL | 2021 | DeepWL: Robust EPID based Winston-Lutz analysis using deep learning, synthetic image generation and optical path-tracing                                              | Dose prediction |
| [213] | DL | 2021 | Deep learning prediction of proton and photon dose distributions for paediatric abdominal tumours                                                                     | Dose prediction |
| [214] | DL | 2021 | Radiation therapy dose prediction for left-sided breast cancers using two-dimensional and three-dimensional deep learning models                                      | Dose prediction |
| [215] | DL | 2021 | Deep learning-augmented radiotherapy visualization with a cylindrical radioluminescence system                                                                        | Dose prediction |
| [216] | DL | 2021 | Deep learning-enabled EPID-based 3D dosimetry for dose verification of step-and-shoot radiotherapy                                                                    | Dose prediction |
| [217] | DL | 2021 | Volumetric modulated arc therapy dose prediction and deliverable treatment plan generation for prostate cancer patients using a densely connected deep learning model | Dose prediction |
| [218] | DL | 2021 | Insights of an AI agent via analysis of prediction errors: A case study of fluence map prediction for radiation therapy planning                                      | Dose prediction |
| [219] | DL | 2021 | Deep learning-based 3D in vivo dose reconstruction with an electronic portal imaging device for magnetic resonance-linear accelerators: a proof of concept study      | Dose prediction |
| [220] | DL | 2021 | Technical Note: A cascade 3D U-Net for dose prediction in radiotherapy                                                                                                | Dose prediction |
| [221] | DL | 2021 | A feasibility study on deep learning-based individualized 3D dose distribution prediction                                                                             | Dose prediction |

|       |    |      |                                                                                                                                                                                     |                            |
|-------|----|------|-------------------------------------------------------------------------------------------------------------------------------------------------------------------------------------|----------------------------|
| [222] | DL | 2021 | Radiation dose prediction for pancreatic stereotactic body radiotherapy via convention neural networks                                                                              | Dose prediction            |
| [223] | DL | 2021 | Learning-based dose prediction for pancreatic stereotactic body radiation therapy using dual pyramid adversarial network                                                            | Dose prediction            |
| [224] | DL | 2021 | A comparison of Monte Carlo dropout and bootstrap aggregation on the performance and uncertainty estimation in radiation therapy dose prediction with deep learning neural networks | Dose prediction            |
| [225] | DL | 2021 | Deep Learning-Based Fluence Map Prediction for Pancreas Stereotactic Body Radiation Therapy With Simultaneous Integrated Boost                                                      | Dose prediction            |
| [226] | DL | 2021 | Transfer learning for fluence map prediction in adrenal stereotactic body radiation therapy                                                                                         | Dose prediction            |
| [227] | DL | 2021 | Dose Prediction Using a Three-Dimensional Convolutional Neural Network for Nasopharyngeal Carcinoma With Tomotherapy                                                                | Dose prediction            |
| [228] | DL | 2021 | Utilizing pre-determined beam orientation information in dose prediction by 3D fully-connected network for intensity modulated radiotherapy                                         | Dose prediction            |
| [229] | ML | 2021 | OpenKBP: The open-access knowledge-based planning grand challenge and dataset                                                                                                       | Dose prediction            |
| [230] | ML | 2021 | Analysis of EPID Transmission Fluence Maps Using Machine Learning Models and CNN for Identifying Position Errors in the Treatment of GO Patients                                    | Dose prediction            |
| [231] | ML | 2021 | Evaluation of dose-volume histogram prediction for organ-at risk and planning target volume based on machine learning                                                               | Dose prediction            |
| [232] | ML | 2021 | Mean parotid dose prediction model using machine learning regression method for intensity-modulated radiotherapy in head and neck cancer                                            | Dose prediction            |
| [233] | ML | 2021 | Detecting MLC modeling errors using radiomics-based machine learning in patient-specific QA with an EPID for intensity-modulated radiation therapy                                  | Dose prediction            |
| [234] | ML | 2021 | Evaluation approach for whole dose distribution in clinical cases using spherical projection and spherical harmonics expansion: spherical coefficient tensor and score method       | Dose prediction            |
| [235] | ML | 2021 | Radiomics analysis of EPID measurements for patient positioning error detection in thyroid associated ophthalmopathy radiotherapy                                                   | Dose prediction            |
| [236] | ML | 2021 | Technical Note: Dose prediction for radiation therapy using feature-based losses and One Cycle Learning                                                                             | Dose Prediction            |
| [237] | DL | 2018 | Quality Assessment of Transperineal Ultrasound Images of the Male Pelvic Region Using Deep Learning                                                                                 | Motion                     |
| [238] | DL | 2018 | ScatterNet: A convolutional neural network for cone-beam CT intensity correction                                                                                                    | Synthetic image generation |
| [239] | DL | 2019 | Paired cycle-GAN-based image correction for quantitative cone-beam computed tomography                                                                                              | Synthetic image generation |
| [240] | DL | 2019 | Self-consistent deep learning-based boosting of 4D cone-beam computed tomography reconstruction                                                                                     | Synthetic image generation |
| [241] | DL | 2019 | Projection-domain scatter correction for cone beam computed tomography using a residual convolutional neural network                                                                | Synthetic image generation |
| [242] | DL | 2020 | Evaluation of CBCT scatter correction using deep convolutional neural networks for head and neck adaptive proton therapy                                                            | Synthetic image generation |

|       |    |      |                                                                                                                                                                   |                            |
|-------|----|------|-------------------------------------------------------------------------------------------------------------------------------------------------------------------|----------------------------|
| [243] | DL | 2020 | AirNet: Fused analytical and iterative reconstruction with deep neural network regularization for sparse-data CT                                                  | Synthetic image generation |
| [244] | DL | 2020 | Study of low-dose PET image recovery using supervised learning with CycleGAN                                                                                      | Synthetic image generation |
| [245] | DL | 2021 | Enhancing digital tomosynthesis (DTS) for lung radiotherapy guidance using patient-specific deep learning model                                                   | Synthetic image generation |
| [246] | DL | 2021 | Respiratory-correlated 4D digital tomosynthesis with deep convolutional neural networks for image-guided radiation therapy                                        | Synthetic image generation |
| [247] | DL | 2021 | Feasibility of Brain Imaging Using a Digital Surround Technology Body Coil: A Study Based on SRGAN-VGG Convolutional Neural Networks                              | Synthetic image generation |
| [248] | DL | 2021 | Deep learning-based thoracic CBCT correction with histogram matching                                                                                              | Synthetic image generation |
| [249] | DL | 2021 | Building a patient-specific model using transfer learning for four-dimensional cone beam computed tomography augmentation                                         | Synthetic image generation |
| [250] | DL | 2018 | GDL-FIRE4D: Deep learning-based fast 4D CT image registration                                                                                                     | Image registration         |
| [251] | DL | 2019 | Real-Time 2D-3D Deformable Registration with Deep Learning and Application to Lung Radiotherapy Targeting                                                         | Image registration         |
| [252] | DL | 2019 | Closing the Gap Between Deep and Conventional Image Registration Using Probabilistic Dense Displacement Networks                                                  | Image registration         |
| [253] | DL | 2019 | A modality conversion approach to MV-DRs and KV-DRRs registration using information bottlenecked conditional generative adversarial network                       | Image registration         |
| [254] | DL | 2020 | Fast contour propagation for MR-guided prostate radiotherapy using convolutional neural networks                                                                  | Image registration         |
| [255] | DL | 2020 | 4D-CT deformable image registration using multiscale unsupervised deep learning                                                                                   | Image registration         |
| [256] | DL | 2020 | Label-driven magnetic resonance imaging (MRI)-transrectal ultrasound (TRUS) registration using weakly supervised learning for MRI-guided prostate radiotherapy    | Image registration         |
| [257] | ML | 2020 | Data clustering to select clinically-relevant test cases for algorithm benchmarking and characterization                                                          | Image registration         |
| [258] | DL | 2021 | Evaluation of a Learning-based Deformable Registration Method on Abdominal CT Images                                                                              | Image registration         |
| [259] | DL | 2021 | A learning-based nonrigid MRI-CBCT image registration method for MRI-guided prostate cancer radiotherapy                                                          | Image registration         |
| [260] | DL | 2021 | Deformable MRI-CT liver image registration using convolutional neural network with modality independent neighborhood descriptors                                  | Image registration         |
| [261] | DL | 2021 | Deformable MR-CBCT prostate registration using biomechanically constrained deep learning networks                                                                 | Image registration         |
| [262] | DL | 2021 | CT-MRI pelvic deformable registration via deep learning                                                                                                           | Image registration         |
| [263] | DL | 2021 | Deep learning-based deformable MRI-CBCT registration of male pelvic region                                                                                        | Image registration         |
| [264] | DL | 2021 | Preliminary Feasibility Study of Imaging Registration between Supine and Prone Breast CT in Breast Cancer Radiotherapy Using Residual Recursive Cascaded Networks | Image registration         |
| [265] | DL | 2021 | Few-shot learning for deformable image registration in 4DCT images                                                                                                | image registration         |

|       |    |      |                                                                                                                                                                           |                    |
|-------|----|------|---------------------------------------------------------------------------------------------------------------------------------------------------------------------------|--------------------|
| [266] | DL | 2021 | Semi-supervised deep learning-based image registration method with volume penalty for real-time breast tumor bed localization                                             | Image registration |
| [267] | DL | 2018 | Fully automated organ segmentation in male pelvic CT images                                                                                                               | Image segmentation |
| [268] | DL | 2018 | Deep Learning Algorithm for Auto-Delineation of High-Risk Oropharyngeal Clinical Target Volumes With Built-In Dice Similarity Coefficient Parameter Optimization Function | Image segmentation |
| [269] | DL | 2018 | Automatic detection and segmentation of brain metastases on multimodal MR images with a deep convolutional neural network                                                 | Image segmentation |
| [270] | DL | 2018 | Deep-learning based surface region selection for deep inspiration breath hold (DIBH) monitoring in left breast cancer radiotherapy                                        | Motion             |
| [271] | DL | 2018 | Heart chamber segmentation from CT using convolutional neural networks                                                                                                    | Image segmentation |
| [272] | DL | 2018 | Automatic Segmentation and 3D Reconstruction of Spine Based on FCN and Marching Cubes in CT Volumes                                                                       | Image segmentation |
| [273] | DL | 2018 | Semi-supervised learning for pelvic MR image segmentation based on multi-task residual fully convolutional networks                                                       | Image segmentation |
| [274] | DL | 2018 | A novel MRI segmentation method using CNN-based correction network for MRI-guided adaptive radiotherapy                                                                   | Image segmentation |
| [275] | DL | 2018 | Comparison of different deep learning approaches for parotid gland segmentation from CT images                                                                            | Image segmentation |
| [276] | DL | 2018 | Autosegmentation for thoracic radiation treatment planning: A grand challenge at AAPM 2017                                                                                | Image segmentation |
| [277] | DL | 2018 | Multi-organ Segmentation of Chest CT Images in Radiation Oncology: Comparison of Standard and Dilated UNet                                                                | Image segmentation |
| [278] | DL | 2018 | On the effect of inter-observer variability for a reliable estimation of uncertainty of medical image segmentation                                                        | Image segmentation |
| [279] | DL | 2018 | Segmentation of the prostate and organs at risk in male pelvic CT images using deep learning                                                                              | Image segmentation |
| [280] | DL | 2018 | A Novel Deep Learning Framework for Internal Gross Target Volume Definition from 4D Computed Tomography of Lung Cancer Patients                                           | Image segmentation |
| [281] | DL | 2018 | Clinical evaluation of atlas and deep learning based automatic contouring for lung cancer                                                                                 | Image segmentation |
| [282] | DL | 2018 | Fully automatic and robust segmentation of the clinical target volume for radiotherapy of breast cancer using big data and deep learning                                  | Image segmentation |
| [283] | DL | 2018 | Organ-At-Risk Segmentation in Brain MRI Using Model-Based Segmentation: Benefits of Deep Learning-Based Boundary Detectors                                                | Image segmentation |
| [284] | DL | 2018 | Technical Note: A deep learning-based autosegmentation of rectal tumors in MR images                                                                                      | Image segmentation |
| [285] | DL | 2018 | Fine-Grained Segmentation Using Hierarchical Dilated Neural Networks                                                                                                      | Image segmentation |
| [286] | ML | 2018 | Autosegmentation of prostate anatomy for radiation treatment planning using deep decision forests of radiomic features                                                    | Image segmentation |
| [287] | ML | 2018 | Bayesian delineation framework of clinical target volumes for prostate cancer radiotherapy using an anatomical-features-based machine learning technique                  | Image segmentation |

|       |    |      |                                                                                                                                                           |                    |
|-------|----|------|-----------------------------------------------------------------------------------------------------------------------------------------------------------|--------------------|
| [288] | ML | 2018 | Automated brain tumor segmentation on magnetic resonance images and patient's overall survival prediction using support vector machines                   | Image segmentation |
| [289] | ML | 2018 | Detection of Lung Contour with Closed Principal Curve and Machine Learning                                                                                | Image segmentation |
| [290] | ML | 2018 | NeXt for neuro-radiosurgery: A fully automatic approach for necrosis extraction in brain tumor MRI using an unsupervised machine learning technique       | Image segmentation |
| [291] | DL | 2019 | Convolutional-neural-network-based feature extraction for liver segmentation from CT images                                                               | Image segmentation |
| [292] | DL | 2019 | Comparative clinical evaluation of atlas and deep-learning-based auto-segmentation of organ structures in liver cancer                                    | Image segmentation |
| [293] | DL | 2019 | Two-stage network for oar segmentation state                                                                                                              | Image segmentation |
| [294] | DL | 2019 | Automatic multiorgan segmentation in thorax CT images using U-net-GAN                                                                                     | Image segmentation |
| [295] | DL | 2019 | Deep learning-based auto-segmentation of targets and organs-at-risk for magnetic resonance imaging only planning of prostate radiotherapy                 | Image segmentation |
| [296] | DL | 2019 | Adversarial Optimization for Joint Registration and Segmentation in Prostate CT Radiotherapy                                                              | Image segmentation |
| [297] | DL | 2019 | Deep generative model-driven multimodal prostate segmentation in radiotherapy                                                                             | Image segmentation |
| [298] | DL | 2019 | Automatic multi-modality segmentation of gross tumor volume for head and neck cancer radiotherapy using 3D U-Net                                          | Image segmentation |
| [299] | DL | 2019 | Gross tumor volume segmentation for head and neck cancer radiotherapy using deep dense multi-modality network                                             | Image segmentation |
| [300] | DL | 2019 | Large-scale evaluation of V-Net for organ segmentation in image guided radiation therapy                                                                  | Image segmentation |
| [301] | DL | 2019 | Artifact-driven sampling schemes for robust female pelvis CBCT segmentation using deep learning                                                           | Image segmentation |
| [302] | DL | 2019 | Evaluation of deep learning methods for parotid gland segmentation from CT images                                                                         | Image segmentation |
| [303] | DL | 2019 | Cardio-pulmonary substructure segmentation of CT images using convolutional neural networks                                                               | Image segmentation |
| [304] | DL | 2018 | Pelvic Organ Segmentation Using Distinctive Curve Guided Fully Convolutional Networks                                                                     | Image segmentation |
| [305] | DL | 2019 | Multi-modal MRI segmentation of sarcoma tumors using convolutional neural networks                                                                        | Image segmentation |
| [306] | DL | 2019 | Semantic segmentation of computed tomography for radiotherapy with deep learning: Compensating insufficient annotation quality using contour augmentation | Image segmentation |
| [307] | DL | 2019 | Cross-modality (CT-MRI) prior augmented deep learning for robust lung tumor segmentation from small MR datasets                                           | Image segmentation |
| [308] | DL | 2019 | Segmentation of organs at risk on head and neck CT for radiotherapy based on 3D deep residual fully convolutional neural network                          | Image segmentation |
| [309] | DL | 2019 | DeepGeoS-V2: Deep interactive segmentation of multiple organs from head and neck images with lightweight CNNs                                             | Image segmentation |
| [310] | DL | 2019 | Automatic multi-organ segmentation in thorax CT images using U-Net-GAN                                                                                    | Image segmentation |
| [311] | DL | 2019 | Ultrasound prostate segmentation based on multidirectional deeply supervised V-Net                                                                        | Image segmentation |

|       |    |      |                                                                                                                                                    |                    |
|-------|----|------|----------------------------------------------------------------------------------------------------------------------------------------------------|--------------------|
| [312] | DL | 2019 | The Tumor Target Segmentation of Nasopharyngeal Cancer in CT Images Based on Deep Learning Methods                                                 | Image segmentation |
| [313] | DL | 2019 | Deep-learning-based detection and segmentation of organs at risk in nasopharyngeal carcinoma computed tomographic images for radiotherapy planning | Image segmentation |
| [314] | DL | 2019 | Deep learning for automated contouring of primary tumor volumes by MRI for nasopharyngeal carcinoma                                                | Image segmentation |
| [315] | DL | 2019 | Use of Crowd Innovation to Develop an Artificial Intelligence-Based Solution for Radiation Therapy Targeting                                       | Image segmentation |
| [316] | DL | 2019 | Segmentation of Organs at Risk in Chest Cavity Using 3D Deep Neural Network                                                                        | Image segmentation |
| [317] | DL | 2019 | Deep Learning Improved Clinical Target Volume Contouring Quality and Efficiency for Postoperative Radiation Therapy in Non-small Cell Lung Cancer  | Image segmentation |
| [318] | DL | 2019 | Prostate Segmentation via Fusing the Nested-V-net3d and V-net2d                                                                                    | Image segmentation |
| [319] | DL | 2019 | Deep learning derived tumor infiltration maps for personalized target definition in Glioblastoma radiotherapy                                      | Image segmentation |
| [320] | DL | 2019 | A fully automatic framework to localize esophageal tumor for radiation therapy                                                                     | Image segmentation |
| [321] | DL | 2019 | A Full-Image Deep Segmenter for CT Images in Breast Cancer Radiotherapy Treatment                                                                  | Image segmentation |
| [322] | DL | 2019 | Automatic liver segmentation with CT images based on 3D U-net deep learning approach                                                               | Image segmentation |
| [323] | DL | 2019 | Multi-organ segmentation of the head and neck area: an efficient hierarchical neural networks approach                                             | Image segmentation |
| [324] | DL | 2019 | Multiorgan segmentation using distance-aware adversarial networks                                                                                  | Image segmentation |
| [325] | DL | 2019 | Dual-energy CT for automatic organs-at-risk segmentation in brain-tumor patients using a multi-atlas and deep-learning approach                    | Image segmentation |
| [326] | DL | 2019 | Benefits of deep learning for delineation of organs at risk in head and neck cancer                                                                | Image segmentation |
| [327] | DL | 2019 | Deep Learning-Based Delineation of Head and Neck Organs at Risk: Geometric and Dosimetric Evaluation                                               | Image segmentation |
| [328] | DL | 2019 | A 2D dilated residual U-net for multi-organ segmentation in thoracic CT                                                                            | Image segmentation |
| [329] | DL | 2019 | Automatic Segmentation of Pelvic Organs after Hysterectomy by using Dilated Convolution U-Net++                                                    | Image segmentation |
| [330] | DL | 2019 | Synthetic MRI-aided multi-organ segmentation on male pelvic CT using cycle consistent deep attention network                                       | Image segmentation |
| [331] | DL | 2019 | Segmentation of venous vessel in MRI using transferred convolutional neural network                                                                | Image segmentation |
| [332] | DL | 2019 | Fully automatic catheter segmentation in MRI with 3D convolutional neural networks: Application to MRI-guided gynecologic brachytherapy            | Image segmentation |
| [333] | DL | 2019 | Boosting-based cascaded convolutional neural networks for the segmentation of CT organs-at-risk in nasopharyngeal carcinoma                        | Image segmentation |
| [334] | DL | 2019 | AnatomyNet: Deep learning for fast and fully automated whole-volume segmentation of head and neck anatomy                                          | Image segmentation |
| [335] | ML | 2019 | Semi-automatic segmentation of MRI brain metastases combining support vector machine and morphological operators                                   | Image segmentation |

|       |    |      |                                                                                                                                                          |                    |
|-------|----|------|----------------------------------------------------------------------------------------------------------------------------------------------------------|--------------------|
| [336] | ML | 2019 | Investigating the behaviour of machine learning techniques to segment brain metastases in radiation therapy planning                                     | Image segmentation |
| [337] | DL | 2020 | Library of deep-learning image segmentation and outcomes model-implementations                                                                           | Image segmentation |
| [338] | DL | 2020 | Deep Learning-based Automated Delineation of Head and Neck Malignant Lesions from PET Images                                                             | Image segmentation |
| [339] | DL | 2020 | Assessment of manual adjustment performed in clinical practice following deep learning contouring for head and neck organs at risk in radiotherapy       | Image segmentation |
| [340] | DL | 2020 | External validation of deep learning-based contouring of head and neck organs at risk                                                                    | Image segmentation |
| [341] | DL | 2020 | Automatic Quality Assessment of Transperineal Ultrasound Images of the Male Pelvic Region, Using Deep Learning                                           | Motion             |
| [342] | DL | 2020 | Deep learning vs. atlas-based models for fast auto-segmentation of the masticatory muscles on head and neck CT images                                    | Image segmentation |
| [343] | DL | 2020 | CNN-Based Quality Assurance for Automatic Segmentation of Breast Cancer in Radiotherapy                                                                  | Image segmentation |
| [344] | DL | 2020 | Fully automated multiorgan segmentation in abdominal magnetic resonance imaging with deep neural networks                                                | Image segmentation |
| [345] | DL | 2020 | Automatic intraprostatic lesion segmentation in multiparametric magnetic resonance images with proposed multiple branch UNet                             | Image segmentation |
| [346] | DL | 2020 | Deep learning-based medical image segmentation with limited labels                                                                                       | Image segmentation |
| [347] | DL | 2020 | Automatic contouring system for cervical cancer using convolutional neural networks                                                                      | Image segmentation |
| [348] | DL | 2020 | Superpixel-based deep convolutional neural networks and active contour model for automatic prostate segmentation on 3D MRI scans                         | Image segmentation |
| [349] | DL | 2020 | Esophagus segmentation from planning CT images using an atlas-based deep learning approach                                                               | Image segmentation |
| [350] | DL | 2020 | MRF-RFS: A Modified Random Forest Recursive Feature Selection Algorithm for Nasopharyngeal Carcinoma Segmentation                                        | Image segmentation |
| [351] | DL | 2020 | Pelvic multi-organ segmentation on cone-beam CT for prostate adaptive radiotherapy                                                                       | Image segmentation |
| [352] | DL | 2020 | Automatic brain organ segmentation with 3d fully convolutional neural network for radiation therapy treatment planning                                   | Image segmentation |
| [353] | DL | 2020 | Hippocampus segmentation in CT using deep learning: Impact of MR versus CT-based training contours                                                       | Image segmentation |
| [354] | DL | 2020 | Cardio-pulmonary substructure segmentation of radiotherapy computed tomography images using convolutional neural networks for clinical outcomes analysis | Image segmentation |
| [355] | DL | 2020 | Automatic tumor segmentation in PET by deep convolutional U-Net with pre-trained encoder                                                                 | Image segmentation |
| [356] | DL | 2020 | Based on DICOM RT Structure and Multiple Loss Function Deep Learning Algorithm in Organ Segmentation of Head and Neck Image                              | Image segmentation |
| [357] | DL | 2020 | Automated hepatobiliary toxicity prediction after liver stereotactic body radiation therapy with deep learning-based portal vein segmentation            | Image segmentation |

|       |    |      |                                                                                                                                                                           |                    |
|-------|----|------|---------------------------------------------------------------------------------------------------------------------------------------------------------------------------|--------------------|
| [358] | DL | 2020 | Deep learning for elective neck delineation: More consistent and time efficient                                                                                           | Image segmentation |
| [359] | DL | 2020 | Evaluation of Automatic Segmentation Model With Dosimetric Metrics for Radiotherapy of Esophageal Cancer                                                                  | Image segmentation |
| [360] | DL | 2020 | A Cascaded Deep-Learning Framework for Segmentation of Metastatic Brain Tumors before and after Stereotactic Radiation Therapy                                            | Image segmentation |
| [361] | DL | 2020 | Automatic liver segmentation in abdominal CT images using combined 2.5D and 3D segmentation networks with high-score shape prior for radiotherapy treatment planning      | Image segmentation |
| [362] | DL | 2020 | Development of a self-constrained 3D DenseNet model in automatic detection and segmentation of nasopharyngeal carcinoma using magnetic resonance images                   | Image segmentation |
| [363] | DL | 2020 | A deep learning-based automated CT segmentation of prostate cancer anatomy for radiation therapy planning-a retrospective multicenter study                               | Image segmentation |
| [364] | DL | 2020 | Training and validation of a commercial deep learning contouring platform                                                                                                 | Image segmentation |
| [365] | DL | 2020 | Cross-domain data augmentation for deep-learning-based male pelvic organ segmentation in cone beam CT                                                                     | Image segmentation |
| [366] | DL | 2020 | Multi-organ segmentation in pelvic CT images with CT-based synthetic MRI                                                                                                  | Image segmentation |
| [367] | DL | 2020 | A physics-guided modular deep-learning based automated framework for tumor segmentation in PET                                                                            | Image segmentation |
| [368] | DL | 2020 | Multi-View Spatial Aggregation Framework for Joint Localization and Segmentation of Organs at Risk in Head and Neck CT Images                                             | Image segmentation |
| [369] | DL | 2020 | A deep learning framework for prostate localization in cone beam CT-guided radiotherapy                                                                                   | Image segmentation |
| [370] | DL | 2020 | Rectum Segmentation in Brachytherapy Dataset Using Recurrent Network                                                                                                      | Image segmentation |
| [371] | DL | 2020 | CT-based multi-organ segmentation using a 3D self-attention U-net network for pancreatic radiotherapy                                                                     | Image segmentation |
| [372] | DL | 2020 | Development and validation of a deep learning algorithm for auto-delineation of clinical target volume and organs at risk in cervical cancer radiotherapy                 | Image segmentation |
| [373] | DL | 2020 | Anatomically consistent CNN-based segmentation of organs-at-risk in cranial radiotherapy                                                                                  | Image segmentation |
| [374] | DL | 2020 | Incorporating sensitive cardiac substructure sparing into radiation therapy planning                                                                                      | Image segmentation |
| [375] | DL | 2020 | Cardiac substructure segmentation with deep learning for improved cardiac sparing                                                                                         | Image segmentation |
| [376] | DL | 2020 | Efficacy evaluation of 2D, 3D U-Net semantic segmentation and atlas-based segmentation of normal lungs excluding the trachea and main bronchi                             | Image segmentation |
| [377] | DL | 2020 | Simple low-cost approaches to semantic segmentation in radiation therapy planning for prostate cancer using deep learning with non-contrast planning CT images            | Image segmentation |
| [378] | DL | 2020 | Evaluation of a multiview architecture for automatic vertebral labeling of palliative radiotherapy simulation CT images                                                   | Image segmentation |
| [379] | DL | 2020 | A method of rapid quantification of patient-specific organ doses for CT using deep-learning-based multi-organ segmentation and GPU-accelerated Monte Carlo dose computing | Image segmentation |
| [380] | DL | 2020 | Hippocampus segmentation on noncontrast CT using deep learning                                                                                                            | Image segmentation |
| [381] | DL | 2020 | Hybrid 3D-ResNet deep learning model for automatic segmentation of thoracic organs at risk in CT images                                                                   | Image segmentation |

|       |    |      |                                                                                                                                                             |                              |
|-------|----|------|-------------------------------------------------------------------------------------------------------------------------------------------------------------|------------------------------|
| [382] | DL | 2020 | Clinical implementation of MRI-based organs-at-risk auto-segmentation with convolutional networks for prostate radiotherapy                                 | Image segmentation           |
| [383] | DL | 2020 | Clinical evaluation of a full-image deep segmentation algorithm for the male pelvis on cone-beam CT and CT                                                  | Image segmentation           |
| [384] | DL | 2020 | Deep learning for brain tumor segmentation in radiosurgery: prospective clinical evaluation                                                                 | Image segmentation           |
| [385] | DL | 2020 | Automatic delineation of the clinical target volume and organs at risk by deep learning for rectal cancer postoperative radiotherapy                        | Image segmentation           |
| [386] | DL | 2020 | Automatic Liver and Spleen Segmentation with CT Images Using Multi-channel U-net Deep Learning Approach                                                     | Image segmentation           |
| [387] | DL | 2020 | Attentionanatomy: A Unified Framework for Whole-Body Organs at Risk Segmentation Using Multiple Partially Annotated Datasets                                | Image segmentation           |
| [388] | DL | 2020 | Postoperative glioma segmentation in CT image using deep feature fusion model guided by multi-sequence MRIs                                                 | Image segmentation           |
| [389] | DL | 2020 | Whole liver segmentation based on deep learning and manual adjustment for clinical use in SIRT                                                              | Image segmentation           |
| [390] | DL | 2020 | Training of head and neck segmentation networks with shape prior on small datasets                                                                          | Image segmentation           |
| [391] | DL | 2020 | Evaluation of measures for assessing time-saving of automatic organ-at-risk segmentation in radiotherapy                                                    | Image segmentation           |
| [392] | DL | 2020 | Improving automatic delineation for head and neck organs at risk by Deep Learning Contouring                                                                | Image segmentation           |
| [393] | DL | 2020 | Complete abdomen and pelvis segmentation using U-net variant architecture                                                                                   | Image segmentation           |
| [394] | DL | 2020 | Comparing deep learning-based auto-segmentation of organs at risk and clinical target volumes to expert inter-observer variability in radiotherapy planning | Image segmentation           |
| [395] | DL | 2020 | Deep-learning-based Detection and Segmentation of Organs at Risk in Head and Neck                                                                           | Image segmentation           |
| [396] | DL | 2020 | Deep learning-based detection and segmentation-assisted management of brain metastases                                                                      | Image segmentation           |
| [397] | DL | 2020 | Sequential and Iterative Auto-Segmentation of High-Risk Clinical Target Volume for Radiotherapy of Nasopharyngeal Carcinoma in Planning CT Images           | Image segmentation           |
| [398] | DL | 2020 | Auto-segmentation of pancreatic tumor in multi-parametric MRI using deep convolutional neural networks                                                      | Image segmentation           |
| [399] | DL | 2020 | Segmentation of organs at risk in nasopharyngeal cancer for radiotherapy using a self-adaptive Unet network                                                 | Image segmentation           |
| [400] | DL | 2020 | Deep-Learning Detection of Cancer Metastases to the Brain on MRI                                                                                            | Detection and classification |
| [401] | DL | 2020 | Automatic Segmentation of Multiple Organs on 3D CT Images by Using Deep Learning Approaches                                                                 | Image segmentation           |
| [402] | ML | 2020 | Development of a new fully three-dimensional methodology for tumours delineation in functional images                                                       | Image segmentation           |
| [403] | ML | 2020 | Multi-atlas-based auto-segmentation for prostatic urethra using novel prediction of deformable image registration accuracy                                  | Image segmentation           |
| [404] | ML | 2020 | Automatic evaluation of contours in radiotherapy planning utilising conformity indices and machine learning                                                 | Image segmentation           |
| [405] | DL | 2021 | PSA-Net: Deep learning-based physician style-aware segmentation network for postoperative prostate cancer clinical target volumes                           | Image segmentation           |

|       |    |      |                                                                                                                                                               |                    |
|-------|----|------|---------------------------------------------------------------------------------------------------------------------------------------------------------------|--------------------|
| [406] | DL | 2021 | RootPainter3D: Interactive-machine-learning enables rapid and accurate contouring for radiotherapy                                                            | Image segmentation |
| [407] | DL | 2021 | A Deep Learning Model to Automate Skeletal Muscle Area Measurement on Computed Tomography Images                                                              | Image segmentation |
| [408] | DL | 2021 | Simple Python Module for Conversions Between DICOM Images and Radiation Therapy Structures, Masks, and Prediction Arrays                                      | Image segmentation |
| [409] | DL | 2021 | Accelerating 3D Medical Image Segmentation by Adaptive Small-Scale Target Localization,                                                                       | Image segmentation |
| [410] | DL | 2021 | A deep learning approach to segmentation of nasopharyngeal carcinoma using computed tomography                                                                | Image segmentation |
| [411] | DL | 2021 | A deep learning-based framework for segmenting invisible clinical target volumes with estimated uncertainties for post-operative prostate cancer radiotherapy | Image segmentation |
| [412] | DL | 2021 | Automatic 3D Ultrasound Segmentation of Uterus Using Deep Learning                                                                                            | Image segmentation |
| [413] | DL | 2021 | Evaluation of deep learning-based autosegmentation in breast cancer radiotherapy                                                                              | Image segmentation |
| [414] | DL | 2021 | Combining Images and T-Staging Information to Improve the Automatic Segmentation of Nasopharyngeal Carcinoma Tumors in MR Images                              | Image segmentation |
| [415] | DL | 2021 | Clinical Target Volume Auto-Segmentation of Esophageal Cancer for Radiotherapy After Radical Surgery Based on Deep Learning                                   | Image segmentation |
| [416] | DL | 2021 | Cascaded SE-ResUnet for segmentation of thoracic organs at risk                                                                                               | Image segmentation |
| [417] | DL | 2021 | Generating High-Quality Lymph Node Clinical Target Volumes for Head and Neck Cancer Radiation Therapy Using a Fully Automated Deep Learning-Based Approach    | Image segmentation |
| [418] | DL | 2021 | BrainTumorNet: Multi-task learning for joint segmentation of high-grade glioma and brain metastases from MR images                                            | Image segmentation |
| [419] | DL | 2021 | Image Segmentation in 3D Brachytherapy Using Convolutional LSTM                                                                                               | Image segmentation |
| [420] | DL | 2021 | A comparative study of auto-contouring softwares in delineation of organs at risk in lung cancer and rectal cancer                                            | Image segmentation |
| [421] | DL | 2021 | A deep learning-based auto-segmentation system for organs-at-risk on whole-body computed tomography images for radiation therapy                              | Image segmentation |
| [422] | DL | 2021 | A deep-learning method for generating synthetic kV-CT and improving tumor segmentation for helical tomotherapy of nasopharyngeal carcinoma                    | Image segmentation |
| [423] | DL | 2021 | Clinical evaluation of atlas- and deep learning-based automatic segmentation of multiple organs and clinical target volumes for breast cancer                 | Image segmentation |
| [424] | DL | 2021 | Clinical feasibility of deep learning-based auto-segmentation of target volumes and organs-at-risk in breast cancer patients after breast-conserving surgery  | Image segmentation |
| [425] | DL | 2021 | Deep learning-based methods for prostate segmentation in magnetic resonance imaging                                                                           | Image segmentation |
| [426] | DL | 2021 | Machine-assisted interpolation algorithm for semi-automated segmentation of highly deformable organs                                                          | Image segmentation |
| [427] | DL | 2021 | Learning rich features with hybrid loss for brain tumor segmentation                                                                                          | Image segmentation |
| [428] | DL | 2021 | Improved U-Net based on contour prediction for efficient segmentation of rectal cancer                                                                        | Image segmentation |

|       |    |      |                                                                                                                                                                                              |                              |
|-------|----|------|----------------------------------------------------------------------------------------------------------------------------------------------------------------------------------------------|------------------------------|
| [429] | DL | 2021 | Multitask 3D CBCT-to-CT translation and organs-at-risk segmentation using physics-based data augmentation                                                                                    | Image segmentation           |
| [430] | DL | 2021 | Region proposal network for multi-organ segmentation in CT for pancreatic radiotherapy                                                                                                       | Image segmentation           |
| [431] | DL | 2021 | Residual mask scoring regional convolutional neural network for multi-organ segmentation in head-And-neck CT                                                                                 | Image segmentation           |
| [432] | DL | 2021 | Synthetic CT-aided multiorgan segmentation for CBCT-guided adaptive pancreatic radiotherapy                                                                                                  | Image segmentation           |
| [433] | DL | 2021 | Many Layer Transfer Learning Genetic Algorithm (MLTLGA): A New Evolutionary Transfer Learning Approach Applied To Pneumonia Classification                                                   | Detection and classification |
| [434] | DL | 2021 | Domain adversarial networks and intensity-based data augmentation for male pelvic organ segmentation in cone beam CT                                                                         | Image segmentation           |
| [435] | DL | 2021 | The impact of training sample size on deep learning-based organ auto-segmentation for head-and-neck patients                                                                                 | Image segmentation           |
| [436] | DL | 2021 | Segmentation of male pelvic organs on computed tomography with a deep neural network fine-tuned by a level-set method                                                                        | Image segmentation           |
| [437] | DL | 2021 | Automatic segmentation of lung tumors on CT images based on a 2D & 3D hybrid convolutional neural network                                                                                    | Image segmentation           |
| [438] | DL | 2021 | A novel semi auto-segmentation method for accurate dose and NTCP evaluation in adaptive head and neck radiotherapy                                                                           | Image segmentation           |
| [439] | DL | 2021 | Deep learning model for automatic contouring of cardiovascular substructures on radiotherapy planning CT images: Dosimetric validation and reader study based clinical acceptability testing | Image segmentation           |
| [440] | DL | 2021 | Semi-automatic sigmoid colon segmentation in CT for radiation therapy treatment planning via an iterative 2.5-D deep learning approach                                                       | Image segmentation           |
| [441] | DL | 2021 | A comparison of methods for fully automatic segmentation of tumors and involved nodes in PET/CT of head and neck cancers                                                                     | Image segmentation           |
| [442] | DL | 2021 | The dosimetric impact of deep learning-based auto-segmentation of organs at risk on nasopharyngeal and rectal cancer                                                                         | Image segmentation           |
| [443] | DL | 2021 | An evaluation of MR based deep learning auto-contouring for planning head and neck radiotherapy                                                                                              | Image segmentation           |
| [444] | DL | 2021 | Feasibility of Evaluating Result of Auto-segmentation of Target Volumes in Radiotherapy with Medical Consideration Index                                                                     | Image segmentation           |
| [445] | DL | 2021 | Automatic segmentation of brain metastases using T1 magnetic resonance and computed tomography images                                                                                        | Image segmentation           |
| [446] | DL | 2021 | 3-D Rol-Aware U-Net for accurate and efficient colorectal tumor segmentation                                                                                                                 | Image segmentation           |
| [447] | DL | 2021 | Automatic delineation of cardiac substructures using a region-based fully convolutional network                                                                                              | Image segmentation           |
| [448] | DL | 2021 | Computer-aided segmentation on MRI for prostate radiotherapy, part II: Comparing human and computer observer populations and the influence of annotator variability on algorithm variability | Image segmentation           |
| [449] | DL | 2021 | AttR2U-Net: A Fully Automated Model for MRI Nasopharyngeal Carcinoma Segmentation Based on Spatial Attention and Residual Recurrent Convolution                                              | Image segmentation           |

|       |    |      |                                                                                                                                                           |                    |
|-------|----|------|-----------------------------------------------------------------------------------------------------------------------------------------------------------|--------------------|
| [450] | DL | 2021 | Deep learning-based classification and structure name standardization for organ at risk and target delineations in prostate cancer radiotherapy           | Image segmentation |
| [451] | DL | 2021 | Evaluation on auto-segmentation of the clinical target volume (Ctv) for graves' ophthalmopathy (go) with a fully convolutional network (fcn) on ct images | Image segmentation |
| [452] | DL | 2021 | Deep cross-modality (MR-CT) educed distillation learning for cone beam CT lung tumor segmentation                                                         | Image segmentation |
| [453] | DL | 2021 | Robustness of deep learning segmentation of cardiac substructures in noncontrast computed tomography for breast cancer radiotherapy                       | Image segmentation |
| [454] | DL | 2021 | Automatic contour segmentation of cervical cancer using artificial intelligence                                                                           | Image segmentation |
| [455] | DL | 2021 | Saliency-guided deep learning network for automatic tumor bed volume delineation in post-operative breast irradiation                                     | Image segmentation |
| [456] | DL | 2021 | Cross-modality deep learning: Contouring of MRI data from annotated CT data only                                                                          | Image segmentation |
| [457] | DL | 2021 | Feasibility of Continual Deep Learning-Based Segmentation for Personalized Adaptive Radiation Therapy in Head and Neck Area                               | Image segmentation |
| [458] | DL | 2021 | Cascaded deep learning-based auto-segmentation for head and neck cancer patients: Organs at risk on T2-weighted magnetic resonance imaging                | Image segmentation |
| [459] | DL | 2021 | Comparison of ASM and CNN based prostate segmentation in CT images                                                                                        | Image segmentation |
| [460] | DL | 2021 | Automatic Segmentation of Brain Structures for Treatment Planning Optimization and Target Volume Definition                                               | Image segmentation |
| [461] | DL | 2021 | Mask R-CNN-based tumor localization and segmentation in 4D Lung CT                                                                                        | Image segmentation |
| [462] | DL | 2021 | Segmenting thoracic cavities with neoplastic lesions: A head-to-head benchmark with fully convolutional neural networks                                   | Image segmentation |
| [463] | DL | 2021 | Fully automated segmentation of brain tumor from multiparametric MRI using 3D context deep supervised U-Net                                               | Image segmentation |
| [464] | DL | 2021 | Multiview Self-Supervised Segmentation for OARs Delineation in Radiotherapy                                                                               | Image segmentation |
| [465] | DL | 2021 | Automated post-operative brain tumour segmentation: A deep learning model based on transfer learning from pre-operative images                            | Image segmentation |
| [466] | DL | 2021 | Esophagus Segmentation in CT Images via Spatial Attention Network and STAPLE Algorithm                                                                    | Image segmentation |
| [467] | DL | 2021 | Coarse-To-Fine Segmentation of Organs at Risk in Nasopharyngeal Carcinoma Radiotherapy                                                                    | Image segmentation |
| [468] | DL | 2021 | Deep Rectum Segmentation for Image Guided Radiation Therapy with Synthetic Data                                                                           | Image segmentation |
| [469] | DL | 2021 | Prostate and dominant intraprostatic lesion segmentation on PET/CT using cascaded regional-net                                                            | Image segmentation |
| [470] | DL | 2021 | Automatic radiotherapy delineation quality assurance on prostate MRI with deep learning in a multicentre clinical trial                                   | Image segmentation |
| [471] | DL | 2021 | Deep learning-based auto-delineation of gross tumour volumes and involved nodes in PET/CT images of head and neck cancer patients                         | Image segmentation |

|       |    |      |                                                                                                                                         |                              |
|-------|----|------|-----------------------------------------------------------------------------------------------------------------------------------------|------------------------------|
| [472] | DL | 2021 | Lung tumor segmentation in 4D CT images using motion convolutional neural networks                                                      | Image segmentation           |
| [473] | DL | 2021 | Quantifying inter-fraction cardiac substructure displacement during radiotherapy via magnetic resonance imaging guidance                | Image segmentation           |
| [474] | DL | 2021 | Tumor Segmentation in Patients with Head and Neck Cancers Using Deep Learning Based-on Multi-modality PET/CT Images                     | Image segmentation           |
| [475] | DL | 2021 | Automated and robust organ segmentation for 3D-based internal dose calculation                                                          | Image segmentation           |
| [476] | DL | 2021 | Effects of sample size and data augmentation on U-Net-based automatic segmentation of various organs                                    | Image segmentation           |
| [477] | DL | 2021 | Continuous-Time Deep Glioma Growth Models                                                                                               | Image segmentation           |
| [478] | DL | 2021 | The predictive value of segmentation metrics on dosimetry in organs at risk of the brain                                                | Image segmentation           |
| [479] | DL | 2021 | Segmentation of low-grade gliomas using U-Net VGG16 with transfer learning                                                              | Image segmentation           |
| [480] | DL | 2021 | Investigation of a Novel Deep Learning-Based Computed Tomography Perfusion Mapping Framework for Functional Lung Avoidance Radiotherapy | Image segmentation           |
| [481] | DL | 2021 | Comparing different CT, PET and MRI multi-modality image combinations for deep learning-based head and neck tumor segmentation          | Image segmentation           |
| [482] | DL | 2021 | Automatic Segmentation Using Deep Learning to Enable Online Dose Optimization During Adaptive Radiation Therapy of Cervical Cancer      | Image segmentation           |
| [483] | DL | 2021 | Oropharyngeal primary tumor segmentation for radiotherapy planning on magnetic resonance imaging using deep learning                    | Image segmentation           |
| [484] | DL | 2021 | Deep-learning-based segmentation of organs-at-risk in the head for MR-assisted radiation therapy planning                               | Image segmentation           |
| [485] | DL | 2021 | AI-Based Quantification of Planned Radiation Therapy Dose to Cardiac Structures and Coronary Arteries in Patients With Breast Cancer    | Image segmentation           |
| [486] | DL | 2021 | Adaptive Attention Convolutional Neural Network for Liver Tumor Segmentation                                                            | Image segmentation           |
| [487] | DL | 2021 | A slice classification model-facilitated 3D encoder-decoder network for segmenting organs at risk in head and neck cancer               | Image segmentation           |
| [488] | DL | 2021 | Automatic clinical target volume delineation for cervical cancer in CT images using deep learning                                       | Image segmentation           |
| [489] | DL | 2021 | Deep learning-based GTV contouring modeling inter- and intra- observer variability in sarcomas                                          | Image segmentation           |
| [490] | DL | 2021 | Deep Learning and Improved Particle Swarm Optimization Based Multimodal Brain Tumor Classification                                      | Detection and classification |
| [491] | DL | 2021 | DA-DSUnet: Dual Attention-based Dense SU-net for automatic head-and-neck tumor segmentation in MRI images                               | Image segmentation           |
| [492] | DL | 2021 | Using Auto-Segmentation to Reduce Contouring and Dose Inconsistency in Clinical Trials: The Simulated Impact on RTOG 0617               | Image segmentation           |
| [493] | DL | 2021 | Deep learning auto-segmentation and automated treatment planning for trismus risk reduction in head and neck cancer radiotherapy        | Image segmentation           |
| [494] | DL | 2021 | Evaluation of auto-segmentation accuracy of cloud-based artificial intelligence and atlas-based models                                  | Image segmentation           |

|       |    |      |                                                                                                                                                                        |                    |
|-------|----|------|------------------------------------------------------------------------------------------------------------------------------------------------------------------------|--------------------|
| [495] | DL | 2021 | Multi-organ segmentation on head and neck dual-energy CT using Deep Neural Networks                                                                                    | Image segmentation |
| [496] | DL | 2021 | Head and neck multi-organ segmentation on dual-energy CT using dual pyramid convolutional neural networks                                                              | Image segmentation |
| [497] | DL | 2021 | Deep Learning-Augmented Head and Neck Organs at Risk Segmentation From CT Volumes                                                                                      | Image segmentation |
| [498] | DL | 2021 | Training and Validation of Deep Learning-Based Auto-Segmentation Models for Lung Stereotactic Ablative Radiotherapy Using Retrospective Radiotherapy Planning Contours | Image segmentation |
| [499] | DL | 2021 | Implementation of deep learning-based auto-segmentation for radiotherapy planning structures: a workflow study at two cancer centers                                   | Image segmentation |
| [500] | DL | 2021 | Deep learning-based segmentation of various brain lesions for radiosurgery                                                                                             | Image segmentation |
| [501] | DL | 2021 | RefineNet-based automatic delineation of the clinical target volume and organs at risk for three-dimensional brachytherapy for cervical cancer                         | Image segmentation |
| [502] | DL | 2021 | Multi-Institutional Validation of Two-Streamed Deep Learning Method for Automated Delineation of Esophageal Gross Tumor Volume Using Planning CT and FDG-PET/CT        | Image segmentation |
| [503] | DL | 2021 | Application of Deep Convolution Network to Automated Image Segmentation of Chest CT for Patients With Tumor                                                            | Image segmentation |
| [504] | DL | 2021 | Prior information guided auto-contouring of breast gland for deformable image registration in postoperative breast cancer radiotherapy                                 | Image segmentation |
| [505] | DL | 2021 | Asymmetric multi-task attention network for prostate bed segmentation in computed tomography images                                                                    | Image segmentation |
| [506] | DL | 2021 | Clinical application and improvement of a CNN-based autosegmentation model for clinical target volumes in cervical cancer radiotherapy                                 | Image segmentation |
| [507] | DL | 2021 | Automated approach for segmenting gross tumor volumes for lung cancer stereotactic body radiation therapy using CT-based dense V-networks                              | Image segmentation |
| [508] | DL | 2021 | Male pelvic CT multi-organ segmentation using synthetic MRI-aided dual pyramid networks                                                                                | Image segmentation |
| [509] | DL | 2021 | A blind randomized validated convolutional neural network for auto-segmentation of clinical target volume in rectal cancer patients receiving neoadjuvant radiotherapy | Image segmentation |
| [510] | DL | 2021 | A hybrid approach based on deep learning and level set formulation for liver segmentation in CT images                                                                 | Image segmentation |
| [511] | DL | 2021 | An Adversarial Deep-Learning-Based Model for Cervical Cancer CTV Segmentation With Multicenter Blinded Randomized Controlled Validation                                | Image segmentation |
| [512] | DL | 2021 | Clinical Evaluation of Deep Learning and Atlas-Based Auto-Contouring of Bladder and Rectum for Prostate Radiation Therapy                                              | Image segmentation |
| [513] | DL | 2021 | Deep-learning system to improve the quality and efficiency of volumetric heart segmentation for breast cancer                                                          | Image segmentation |
| [514] | DL | 2021 | Automatic segmentation of organs at risk and tumors in CT images of lung cancer from partially labelled datasets with a semi-supervised conditional nnU-Net            | Image segmentation |
| [515] | DL | 2021 | Weaving attention U-net: A novel hybrid CNN and attention-based method for organs-at-risk segmentation in head and neck CT images                                      | Image segmentation |
| [516] | DL | 2021 | Semi-supervised semantic segmentation of prostate and organs-at-risk on 3D pelvic CT images                                                                            | Image segmentation |

|       |    |      |                                                                                                                                                                                 |                              |
|-------|----|------|---------------------------------------------------------------------------------------------------------------------------------------------------------------------------------|------------------------------|
| [517] | DL | 2021 | ARPM-net: A novel CNN-based adversarial method with Markov random field enhancement for prostate and organs at risk segmentation in pelvic CT images                            | Image segmentation           |
| [518] | DL | 2021 | A deep learning based automatic segmentation approach for anatomical structures in intensity modulation radiotherapy                                                            | Image segmentation           |
| [519] | ML | 2021 | A multiparametric mri-based radiomics analysis to efficiently classify tumor subregions of glioblastoma: A pilot study in machine learning                                      | Detection and classification |
| [520] | DL | 2018 | Accurate real time localization tracking in a clinical environment using Bluetooth Low Energy and deep learning                                                                 | Motion                       |
| [521] | ML | 2018 | A machine learning approach for biomechanics-based tracking of lung tumor during external beam radiation therapy                                                                | Motion                       |
| [522] | ML | 2018 | Markerless tumor gating and tracking for lung cancer radiotherapy based on machine learning techniques                                                                          | Motion                       |
| [523] | DL | 2019 | Attention-aware fully convolutional neural network with convolutional long short-term memory network for ultrasound-based motion tracking                                       | Motion                       |
| [524] | DL | 2019 | Technical Note: Real-time 3D MRI in the presence of motion for MRI-guided radiotherapy: 3D Dynamic keyhole imaging with super-resolution                                        | Motion                       |
| [525] | DL | 2019 | Advanced 4-dimensional cone-beam computed tomography reconstruction by combining motion estimation, motion-compensated reconstruction, biomechanical modeling and deep learning | Motion                       |
| [526] | DL | 2019 | Incorporating imaging information from deep neural network layers into image guided radiation therapy (IGRT)                                                                    | Motion                       |
| [527] | DL | 2019 | Toward markerless image-guided radiotherapy using deep learning for prostate cancer                                                                                             | Motion                       |
| [528] | DL | 2019 | Automatic marker-free target positioning and tracking for image-guided radiotherapy and interventions                                                                           | Motion                       |
| [529] | ML | 2019 | Bayesian model-based liver respiration motion prediction and evaluation using single-cycle and double-cycle 4D CT images                                                        | Motion                       |
| [530] | ML | 2019 | 2D ultrasound imaging based intra-fraction respiratory motion tracking for abdominal radiation therapy using machine learning                                                   | Motion                       |
| [531] | ML | 2019 | A Super-Learner Model for Tumor Motion Prediction and Management in Radiation Therapy: Development and Feasibility Evaluation                                                   | Motion                       |
| [532] | ML | 2019 | Commissioning of a fluoroscopic-based real-time markerless tumor tracking system in a superconducting rotating gantry for carbon-ion pencil beam scanning treatment             | Motion                       |
| [533] | DL | 2020 | Prediction of in-plane organ deformation during free-breathing radiotherapy via discriminative spatial transformer networks                                                     | Motion                       |
| [534] | DL | 2020 | Deep learning-based real-time volumetric imaging for lung stereotactic body radiation therapy: A proof of concept study                                                         | Motion                       |
| [535] | DL | 2020 | Artificial intelligence-based framework in evaluating intrafraction motion for liver cancer robotic stereotactic body radiation therapy with fiducial tracking                  | Motion                       |
| [536] | DL | 2020 | Cascaded one-shot deformable convolutional neural networks: Developing a deep learning model for respiratory motion estimation in ultrasound sequences                          | Motion                       |

|       |    |      |                                                                                                                                                                                                                        |                    |
|-------|----|------|------------------------------------------------------------------------------------------------------------------------------------------------------------------------------------------------------------------------|--------------------|
| [537] | DL | 2020 | Deep Learning model for markerless tracking in spinal SBRT                                                                                                                                                             | Motion             |
| [538] | DL | 2020 | Deep learning-based image reconstruction and motion estimation from undersampled radial k-space for real-time MRI-guided radiotherapy                                                                                  | Motion             |
| [539] | DL | 2020 | DeepOrganNet: On-the-Fly Reconstruction and Visualization of 3D / 4D Lung Models from Single-View Projections by Deep Deformation Network                                                                              | Motion             |
| [540] | DL | 2020 | A Windows GUI application for real-time image guidance during motion-managed proton beam therapy                                                                                                                       | Motion             |
| [541] | ML | 2020 | Semi-automated prediction approach of target shifts using machine learning with anatomical features between planning and pretreatment CT images in prostate radiotherapy                                               | Motion             |
| [542] | ML | 2020 | Morphological autoencoders for apnea detection in respiratory gating radiotherapy                                                                                                                                      | Motion             |
| [543] | ML | 2020 | A machine learning-based real-time tumor tracking system for fluoroscopic gating of lung radiotherapy                                                                                                                  | Motion             |
| [544] | DL | 2021 | An Upgraded Siamese Neural Network for Motion Tracking in Ultrasound Image Sequences                                                                                                                                   | Motion             |
| [545] | DL | 2021 | Real-time respiratory tumor motion prediction based on a temporal convolutional neural network: Prediction model development study                                                                                     | Motion             |
| [546] | DL | 2021 | Deep learning-based motion tracking using ultrasound images                                                                                                                                                            | Motion             |
| [547] | DL | 2021 | Automatic Detection and Tracking of Marker Seeds Implanted in Prostate Cancer Patients using a Deep Learning Algorithm                                                                                                 | Motion             |
| [548] | DL | 2021 | Improving motion-mask segmentation in thoracic CT with multiplanar U-nets                                                                                                                                              | Motion             |
| [549] | DL | 2021 | Motion tracking in 3D ultrasound imaging based on markov-like deep-learning-based deformable registration                                                                                                              | Motion             |
| [550] | DL | 2021 | A semi-supervised autoencoder framework for joint generation and classification of breathing                                                                                                                           | Motion             |
| [551] | DL | 2021 | A feasibility study on the development and use of a deep learning model to automate real-time monitoring of tumor position and assessment of interfraction fiducial marker migration in prostate radiotherapy patients | Motion             |
| [552] | DL | 2021 | Population-based 3D respiratory motion modelling from convolutional autoencoders for 2D ultrasound-guided radiotherapy                                                                                                 | Motion             |
| [553] | DL | 2021 | Decompose kV projection using neural network for improved motion tracking in paraspinal SBRT,                                                                                                                          | Motion             |
| [554] | ML | 2021 | Evaluation of super-resolution on 50 pancreatic cancer patients with real-time cine MRI from 0.35T MRgRT                                                                                                               | Motion             |
| [555] | ML | 2021 | Stability of conventional and machine learning-based tumor auto-segmentation techniques using undersampled dynamic radial bSSFP acquisitions on a 0.35 T hybrid MR-linac system                                        | Motion             |
| [556] | ML | 2021 | Real-time liver tracking algorithm based on LSTM and SVR networks for use in surface-guided radiation therapy                                                                                                          | Motion             |
| [557] | DL | 2018 | Deep learning for lung cancer prognostication: A retrospective multi-cohort radiomics study                                                                                                                            | Outcome prediction |
| [558] | DL | 2018 | Development of deep neural network for individualized hepatobiliary toxicity prediction after liver SBRT                                                                                                               | Outcome prediction |
| [559] | DL | 2018 | Deep learning-based survival analysis identified associations between molecular subtype and optimal adjuvant treatment of patients with Gastric cancer                                                                 | Outcome prediction |
| [560] | DL | 2018 | Prediction of Response to Stereotactic Radiosurgery for Brain Metastases Using Convolutional Neural Networks                                                                                                           | Outcome prediction |

|       |    |      |                                                                                                                                                                                                                                                    |                     |
|-------|----|------|----------------------------------------------------------------------------------------------------------------------------------------------------------------------------------------------------------------------------------------------------|---------------------|
| [561] | ML | 2018 | Rectal wall MRI radiomics in prostate cancer patients: prediction of and correlation with early rectal toxicity                                                                                                                                    | Outcome prediction  |
| [562] | ML | 2018 | Cochlea CT radiomics predicts chemoradiotherapy induced sensorineural hearing loss in head and neck cancer patients: A machine learning and multi-variable modelling study                                                                         | Outcome prediction  |
| [563] | ML | 2018 | Exploratory analysis using machine learning to predict for chest wall pain in patients with stage I non-small-cell lung cancer treated with stereotactic body radiation therapy                                                                    | Outcome prediction  |
| [564] | ML | 2018 | Incorporating spatial dose metrics in machine learning-based normal tissue complication probability (NTCP) models of severe acute dysphagia resulting from head and neck radiotherapy                                                              | Outcome prediction  |
| [565] | ML | 2018 | Machine learning algorithms for outcome prediction in (chemo)radiotherapy: An empirical comparison of classifiers                                                                                                                                  | Outcome prediction  |
| [566] | ML | 2018 | Identifying Genes to Predict Cancer Radiotherapy-Related Fatigue with Machine-Learning Methods                                                                                                                                                     | Outcome prediction  |
| [567] | ML | 2018 | Investigation of radiomic signatures for local recurrence using primary tumor texture analysis in oropharyngeal head and neck cancer patients                                                                                                      | Outcome prediction  |
| [568] | ML | 2018 | Machine learning applications in head and neck radiation oncology: Lessons from open-source radiomics challenges                                                                                                                                   | Outcome prediction  |
| [569] | ML | 2018 | Design and selection of machine learning methods using radiomics and dosiomics for normal tissue complication probability modeling of xerostomia                                                                                                   | Outcome prediction  |
| [570] | ML | 2018 | Predicting pathological response to neoadjuvant chemotherapy in breast cancer patients based on imbalanced clinical data                                                                                                                           | Outcome prediction  |
| [571] | ML | 2018 | Feasibility study of individualized optimal positioning selection for left-sided whole breast radiotherapy: DIBH or prone                                                                                                                          | Patient positioning |
| [572] | ML | 2019 | Investigating rectal toxicity associated dosimetric features with deformable accumulated rectal surface dose maps for cervical cancer radiotherapy                                                                                                 | Outcome prediction  |
| [573] | ML | 2018 | Machine Learning on a Genome-wide Association Study to Predict Late Genitourinary Toxicity After Prostate Radiation Therapy                                                                                                                        | Outcome prediction  |
| [574] | ML | 2018 | Fifteen-gene expression based model predicts the survival of clear cell renal cell carcinoma                                                                                                                                                       | Outcome prediction  |
| [575] | ML | 2018 | Use of radiomics combined with machine learning method in the recurrence patterns after intensity-modulated radiotherapy for nasopharyngeal carcinoma: A preliminary study                                                                         | Outcome prediction  |
| [576] | ML | 2018 | A pilot study using kernelled support tensor machine for distant failure prediction in lung SBRT                                                                                                                                                   | Outcome prediction  |
| [577] | ML | 2018 | A gene expression signature predicts recurrence-free survival in meningioma                                                                                                                                                                        | Outcome prediction  |
| [578] | ML | 2018 | Predicting acute odynophagia during lung cancer radiotherapy using observations derived from patient-centred nursing care                                                                                                                          | Outcome prediction  |
| [579] | ML | 2018 | Treatment-related features improve machine learning prediction of prognosis in soft tissue sarcoma patients [Therapieinformationen verbessern auf maschinellem Lernen basierende prognostische Einschätzungen für Patienten mit Weichteilsarkomen] | Outcome prediction  |
| [580] | ML | 2018 | Radiomic signature of infiltration in peritumoral edema predicts subsequent recurrence in glioblastoma: Implications for personalized radiotherapy planning                                                                                        | Outcome prediction  |

|       |    |      |                                                                                                                                                                                                                        |                    |
|-------|----|------|------------------------------------------------------------------------------------------------------------------------------------------------------------------------------------------------------------------------|--------------------|
| [581] | ML | 2018 | Technical note: A radiomic signature of infiltration in peritumoral edema predicts subsequent recurrence in glioblastoma                                                                                               | Outcome prediction |
| [582] | ML | 2018 | Predicting ionizing radiation exposure using biochemically-inspired genomic machine learning [version 1 referees: 3 approved]                                                                                          | Outcome prediction |
| [583] | ML | 2018 | Using data mining for survival prediction in patients with colon cancer                                                                                                                                                | Outcome prediction |
| [584] | ML | 2018 | Predicting Radiotherapy Response in Head and Neck Patients Using Quantitative Ultrasound                                                                                                                               | Outcome prediction |
| [585] | ML | 2018 | A radiomics approach to assess tumour-infiltrating CD8 cells and response to anti-PD-1 or anti-PD-L1 immunotherapy: an imaging biomarker, retrospective multicohort study                                              | Outcome prediction |
| [586] | ML | 2018 | Voxel-wise prostate cell density prediction using multiparametric magnetic resonance imaging and machine learning                                                                                                      | Outcome prediction |
| [587] | ML | 2018 | A Novel Approach for Identifying Relevant Genes for Breast Cancer Survivability on Specific Therapies                                                                                                                  | Outcome prediction |
| [588] | ML | 2018 | Strategies for prediction and mitigation of radiation-induced liver toxicity                                                                                                                                           | Outcome prediction |
| [589] | ML | 2018 | Salvage HDR Brachytherapy: Multiple Hypothesis Testing Versus Machine Learning Analysis                                                                                                                                | Outcome prediction |
| [590] | ML | 2018 | A comparative study of machine learning techniques for the improved prediction of NSCLC survival analysis                                                                                                              | Outcome prediction |
| [591] | DL | 2019 | Bragatston study protocol: A multicentre cohort study on automated quantification of cardiovascular calcifications on radiotherapy planning CT scans for cardiovascular risk prediction in patients with breast cancer | Outcome prediction |
| [592] | DL | 2019 | Treatment response prediction of hepatocellular carcinoma patients from abdominal ct images with deep convolutional neural networks                                                                                    | Outcome prediction |
| [593] | DL | 2019 | An image-based deep learning framework for individualising radiotherapy dose: a retrospective analysis of outcome prediction                                                                                           | Outcome prediction |
| [594] | DL | 2019 | A Deep Learning Model for Predicting Xerostomia Due to Radiation Therapy for Head and Neck Squamous Cell Carcinoma in the RTOG 0522 Clinical Trial                                                                     | Outcome prediction |
| [595] | DL | 2019 | Artificial Neural Network with Composite Architectures for Prediction of Local Control in Radiotherapy                                                                                                                 | Outcome prediction |
| [596] | DL | 2019 | Multi-objective ensemble deep learning using electronic health records to predict outcomes after lung cancer radiotherapy                                                                                              | Outcome prediction |
| [597] | ML | 2019 | Machine learning-based radiomic models to predict intensity-modulated radiation therapy response, Gleason score and stage in prostate cancer                                                                           | Outcome prediction |
| [598] | ML | 2019 | Radiomic Machine Learning and Texture Analysis - New Horizons for Head and Neck Oncology                                                                                                                               | Outcome prediction |
| [599] | ML | 2019 | Using a neural network to predict deviations in mean heart dose during the treatment of left-sided deep inspiration breath hold patients                                                                               | Motion             |
| [600] | ML | 2019 | Developing infrared spectroscopic detection for stratifying brain tumour patients: Glioblastoma multiforme: Vs. lymphoma                                                                                               | Outcome prediction |
| [601] | ML | 2019 | Developing a Novel Machine Learning-Based Classification Scheme for Predicting SPCs in Breast Cancer Survivors                                                                                                         | Outcome prediction |

|       |    |      |                                                                                                                                                                                            |                    |
|-------|----|------|--------------------------------------------------------------------------------------------------------------------------------------------------------------------------------------------|--------------------|
| [602] | ML | 2019 | Combining handcrafted features with latent variables in machine learning for prediction of radiation-induced lung damage                                                                   | Outcome prediction |
| [603] | ML | 2019 | Machine Learning-Based Radiomics Predicts Radiotherapeutic Response in Patients With Acromegaly                                                                                            | Outcome prediction |
| [604] | ML | 2019 | Radiomics and Dosimetrics for Predicting Local Control after Carbon-Ion Radiotherapy in Skull-Base Chordoma                                                                                | Outcome prediction |
| [605] | ML | 2019 | Radiomics features measured with multiparametric magnetic resonance imaging predict prostate cancer aggressiveness                                                                         | Outcome prediction |
| [606] | ML | 2019 | Machine Learning Methods Uncover Radiomorphologic Dose Patterns in Salivary Glands that Predict Xerostomia in Patients with Head and Neck Cancer                                           | Outcome prediction |
| [607] | ML | 2019 | Radiomic analysis of planning computed tomograms for predicting radiation-induced lung injury and outcome in lung cancer patients treated with robotic stereotactic body radiation therapy | Outcome prediction |
| [608] | ML | 2019 | Predicting acute radiation induced xerostomia in head and neck Cancer using MR and CT Radiomics of parotid and submandibular glands                                                        | Outcome prediction |
| [609] | ML | 2019 | Quantitative MRI Biomarkers of Stereotactic Radiotherapy Outcome in Brain Metastasis                                                                                                       | Outcome prediction |
| [610] | ML | 2019 | Radio-morphology: Parametric shape-based features in radiotherapy                                                                                                                          | Outcome prediction |
| [611] | ML | 2019 | Prediction of recurrence-associated death from localized prostate cancer with a charlson comorbidity index-reinforced machine learning model                                               | Outcome prediction |
| [612] | ML | 2019 | Personalized Radiotherapy Design for Glioblastoma: Integrating Mathematical Tumor Models, Multimodal Scans, and Bayesian Inference                                                         | Treatment planning |
| [613] | ML | 2019 | Predicting radiation pneumonitis in locally advanced stage II–III non-small cell lung cancer using machine learning                                                                        | Outcome prediction |
| [614] | ML | 2019 | The Potential Role of Radiomics and Radiogenomics in Patient Stratification by Tumor Hypoxia Status                                                                                        | Outcome prediction |
| [615] | ML | 2019 | Optimization of treatment strategy by using a machine learning model to predict survival time of patients with malignant glioma after radiotherapy                                         | Outcome prediction |
| [616] | ML | 2019 | Regression Models and Ranking Method for p53 Inhibitor Candidates Using Machine Learning                                                                                                   | Outcome prediction |
| [617] | ML | 2019 | Comparison of machine learning algorithms and oversampling techniques for urinary toxicity prediction after prostate cancer radiotherapy                                                   | Outcome prediction |
| [618] | ML | 2019 | The Needs and Benefits of Continuous Model Updates on the Accuracy of RT-Induced Toxicity Prediction Models Within a Learning Health System                                                | Outcome prediction |
| [619] | ML | 2019 | Machine learning techniques combined with dose profiles indicate radiation response biomarkers                                                                                             | Outcome prediction |
| [620] | ML | 2019 | CT-based radiomic features predict tumor grading and have prognostic value in patients with soft tissue sarcomas treated with neoadjuvant radiation therapy                                | Outcome prediction |
| [621] | ML | 2019 | Predicting Survival of Patients with Spinal Ependymoma Using Machine Learning Algorithms with the SEER Database                                                                            | Outcome prediction |
| [622] | ML | 2019 | Machine learning for prediction of chemoradiation therapy response in rectal cancer using pre-treatment and mid-radiation multi-parametric MRI                                             | Outcome prediction |

|       |    |      |                                                                                                                                                                             |                    |
|-------|----|------|-----------------------------------------------------------------------------------------------------------------------------------------------------------------------------|--------------------|
| [623] | ML | 2019 | Integration of Data Mining Classification Techniques and Ensemble Learning for Predicting the Type of Breast Cancer Recurrence                                              | Outcome prediction |
| [624] | ML | 2019 | A machine-learning-based prediction model of fistula formation after interstitial brachytherapy for locally advanced gynecological malignancies                             | Outcome prediction |
| [625] | ML | 2019 | Predictive quantitative ultrasound radiomic markers associated with treatment response in head and neck cancer                                                              | Outcome prediction |
| [626] | ML | 2020 | Automated data extraction and ensemble methods for predictive modeling of breast cancer outcomes after radiation therapy                                                    | Outcome prediction |
| [627] | ML | 2019 | Prognostic nomogram for bladder cancer with brain metastases: A National Cancer Database analysis                                                                           | Outcome prediction |
| [628] | ML | 2019 | Machine learning to build and validate a model for radiation pneumonitis prediction in patients with non-small cell lung cancer                                             | Outcome prediction |
| [629] | ML | 2019 | The tumor infiltrating leukocyte cell composition are significant markers for prognostics of radiotherapy of rectal cancer as revealed by cell type deconvolution           | Outcome prediction |
| [630] | DL | 2020 | MDR-SURV: A Multi-Scale Deep Learning-Based Radiomics for Survival Prediction in Pulmonary Malignancies                                                                     | Outcome prediction |
| [631] | DL | 2020 | Prognostic value of anthropometric measures extracted from whole-body CT using deep learning in patients with non-small-cell lung cancer                                    | Outcome prediction |
| [632] | DL | 2020 | Development and Validation of a Deep Learning Radiomics Model Predicting Lymph Node Status in Operable Cervical Cancer                                                      | Outcome prediction |
| [633] | DL | 2020 | Deep learning methodology for differentiating glioma recurrence from radiation necrosis using multimodal magnetic resonance imaging: Algorithm development and validation   | Outcome prediction |
| [634] | DL | 2020 | Deep Learning Strategies for Survival Prediction in Prophylactic Resection Patients                                                                                         | Outcome prediction |
| [635] | DL | 2020 | Deep learning for identification of critical regions associated with toxicities after liver stereotactic body radiation therapy                                             | Outcome prediction |
| [636] | DL | 2020 | Survival prediction of liver cancer patients from CT images using deep learning and radiomic feature-based regression                                                       | Outcome prediction |
| [637] | DL | 2020 | A Deep Learning Approach Validates Genetic Risk Factors for Late Toxicity After Prostate Cancer Radiotherapy in a REQUITE Multi-National Cohort                             | Outcome prediction |
| [638] | DL | 2020 | Effect of Radiation Doses to the Heart on Survival for Stereotactic Ablative Radiotherapy for Early-stage Non-Small-cell Lung Cancer: An Artificial Neural Network Approach | Outcome prediction |
| [639] | DL | 2020 | Dose-Distribution-Driven PET Image-Based Outcome Prediction (DDD-PIOP): A Deep Learning Study for Oropharyngeal Cancer IMRT Application                                     | Outcome prediction |
| [640] | DL | 2020 | User-controlled pipelines for feature integration and head and neck radiation therapy outcome predictions                                                                   | Outcome prediction |
| [641] | DL | 2020 | A novel deep learning model using dosimetric and clinical information for grade 4 radiotherapy-induced lymphopenia prediction                                               | Outcome prediction |
| [642] | ML | 2020 | Prediction of Survival and Recurrence Patterns by Machine Learning in Gastric Cancer Cases Undergoing Radiation Therapy and Chemotherapy                                    | Outcome prediction |

|       |    |      |                                                                                                                                                                                                                      |                    |
|-------|----|------|----------------------------------------------------------------------------------------------------------------------------------------------------------------------------------------------------------------------|--------------------|
| [643] | ML | 2020 | Evaluation of Prognosis in Nasopharyngeal Cancer Using Machine Learning                                                                                                                                              | Outcome prediction |
| [644] | ML | 2020 | Developing an Improved Statistical Approach for Survival Estimation in Bone Metastases Management: The Bone Metastases Ensemble Trees for Survival (BMETS) Model                                                     | Outcome prediction |
| [645] | ML | 2020 | Comparative Effectiveness of Proton vs Photon Therapy as Part of Concurrent Chemoradiotherapy for Locally Advanced Cancer                                                                                            | Outcome prediction |
| [646] | ML | 2020 | Overlooked pitfalls in multi-class machine learning classification in radiation oncology and how to avoid them                                                                                                       | Outcome prediction |
| [647] | ML | 2020 | Artificial neural networks allow response prediction in squamous cell carcinoma of the scalp treated with radiotherapy                                                                                               | Outcome prediction |
| [648] | ML | 2020 | Multi-Habitat Based Radiomics for the Prediction of Treatment Response to Concurrent Chemotherapy and Radiation Therapy in Locally Advanced Cervical Cancer                                                          | Outcome prediction |
| [649] | ML | 2020 | Prediction of Radiation-Related Dental Caries Through PyRadiomics Features and Artificial Neural Network on Panoramic Radiography                                                                                    | Outcome prediction |
| [650] | ML | 2020 | Ensemble Learning for Prediction of Toxicity in Prostate Cancer Radiotherapy: Comparison between Stacking and Genetic Algorithm Weighted Voting                                                                      | Outcome prediction |
| [651] | ML | 2020 | Comparison of feature selection in radiomics for the prediction of overall survival after radiotherapy for hepatocellular carcinoma                                                                                  | Outcome prediction |
| [652] | ML | 2020 | Differentiation of treatment-related effects from glioma recurrence using machine learning classifiers based upon pre-and post-contrast T1WI and T2 FLAIR subtraction features: A two-center study                   | Outcome prediction |
| [653] | ML | 2020 | Spatial Radiation Dose Influence on Xerostomia Recovery and Its Comparison to Acute Incidence in Patients With Head and Neck Cancer                                                                                  | Outcome prediction |
| [654] | ML | 2020 | Gene signature based on B cell predicts clinical outcome of radiotherapy and immunotherapy for patients with lung adenocarcinoma                                                                                     | Outcome prediction |
| [655] | ML | 2020 | Radiomics Method for the Differential Diagnosis of Radionecrosis Versus Progression after Fractionated Stereotactic Body Radiotherapy for Brain Oligometastasis                                                      | Outcome prediction |
| [656] | ML | 2020 | Machine Learning-Guided Adjuvant Treatment of Head and Neck Cancer                                                                                                                                                   | Outcome prediction |
| [657] | ML | 2020 | Predicting Local Failure after Stereotactic Radiation Therapy in Brain Metastasis using Quantitative CT and Machine Learning                                                                                         | Outcome prediction |
| [658] | ML | 2020 | Machine learning model to predict pseudoprogression versus progression in glioblastoma using mri: A multi-institutional study (krog 18-07)                                                                           | Outcome prediction |
| [659] | ML | 2020 | Comparison of statistical machine learning models for rectal protocol compliance in prostate external beam radiation therapy                                                                                         | Outcome prediction |
| [660] | ML | 2020 | Prediction of Cranial Radiotherapy Treatment in Pediatric Acute Lymphoblastic Leukemia Patients Using Machine Learning: A Case Study at MAHAK Hospital                                                               | Outcome prediction |
| [661] | ML | 2020 | Computed tomography-derived radiomic signature of head and neck squamous cell carcinoma (peri)tumoral tissue for the prediction of locoregional recurrence and distant metastasis after concurrent chemoradiotherapy | Outcome prediction |

|       |    |      |                                                                                                                                                                                                           |                    |
|-------|----|------|-----------------------------------------------------------------------------------------------------------------------------------------------------------------------------------------------------------|--------------------|
| [662] | ML | 2020 | A single-institutional experience with low dose stereotactic body radiation therapy for liver metastases                                                                                                  | Outcome prediction |
| [663] | ML | 2020 | Multi-view radiomics and dosiomics analysis with machine learning for predicting acute-phase weight loss in lung cancer patients treated with radiotherapy                                                | Outcome prediction |
| [664] | ML | 2020 | Machine learning highlights the deficiency of conventional dosimetric constraints for prevention of high-grade radiation esophagitis in non-small cell lung cancer treated with chemoradiation            | Outcome prediction |
| [665] | ML | 2020 | Electron Density and Biologically Effective Dose (BED) Radiomics-Based Machine Learning Models to Predict Late Radiation-Induced Subcutaneous Fibrosis                                                    | Outcome prediction |
| [666] | ML | 2020 | Development and application of an elastic net logistic regression model to investigate the impact of cardiac substructure dose on radiation-induced pericardial effusion in patients with NSCLC           | Outcome prediction |
| [667] | ML | 2020 | Dosimetric predictors of patient-reported toxicity after prostate stereotactic body radiotherapy: Analysis of full range of the dose-volume histogram using ensemble machine learning                     | Outcome prediction |
| [668] | ML | 2020 | Survival prediction for oral tongue cancer patients via probabilistic genetic algorithm optimized neural network models                                                                                   | Outcome prediction |
| [669] | ML | 2020 | Machine learning based on a multiparametric and multiregional radiomics signature predicts radiotherapeutic response in patients with glioblastoma                                                        | Outcome prediction |
| [670] | ML | 2020 | A Comparison Study of Machine Learning (Random Survival Forest) and Classic Statistic (Cox Proportional Hazards) for Predicting Progression in High-Grade Glioma after Proton and Carbon Ion Radiotherapy | Outcome prediction |
| [671] | ML | 2020 | Prediction of KRAS, NRAS and BRAF status in colorectal cancer patients with liver metastasis using a deep artificial neural network based on radiomics and semantic features                              | Outcome prediction |
| [672] | ML | 2020 | External Validation of a Predictive Model for Acute Skin Radiation Toxicity in the REQUITE Breast Cohort                                                                                                  | Outcome prediction |
| [673] | ML | 2020 | Novel prognostication of patients with spinal and pelvic chondrosarcoma using deep survival neural networks                                                                                               | Outcome prediction |
| [674] | ML | 2020 | Comprehensive Analysis of Tumour Sub-Volumes for Radiomic Risk Modelling in Locally Advanced HNSCC                                                                                                        | Outcome prediction |
| [675] | ML | 2020 | Senescence-Associated Secretory Phenotype Determines Survival and Therapeutic Response in Cervical Cancer                                                                                                 | Outcome prediction |
| [676] | ML | 2020 | Quantitative Thermal Imaging Biomarkers to Detect Acute Skin Toxicity From Breast Radiation Therapy Using Supervised Machine Learning                                                                     | Outcome prediction |
| [677] | ML | 2020 | Risk stratification of locally advanced non-small cell lung cancer (Nslc) patients treated with chemo-radiotherapy: An institutional analysis                                                             | Outcome prediction |
| [678] | ML | 2020 | Predicting salvage laryngectomy in patients treated with primary nonsurgical therapy for laryngeal squamous cell carcinoma using machine learning                                                         | Outcome prediction |
| [679] | ML | 2020 | Comparison of patient stratification by computed tomography radiomics and hypoxia positron emission tomography in head-and-neck cancer radiotherapy                                                       | Outcome prediction |
| [680] | ML | 2020 | A multi-scanner study of MRI radiomics in uterine cervical cancer: prediction of in-field tumor control after definitive radiotherapy based on a machine learning method including peritumoral regions    | Outcome prediction |
| [681] | ML | 2020 | Development and Validation of a Comprehensive Multivariate Dosimetric Model for Predicting Late Genitourinary Toxicity Following Prostate Cancer Stereotactic Body Radiotherapy                           | Outcome prediction |

|       |    |      |                                                                                                                                                                                             |                    |
|-------|----|------|---------------------------------------------------------------------------------------------------------------------------------------------------------------------------------------------|--------------------|
| [682] | ML | 2020 | Quantitative ultrasound delta-radiomics during radiotherapy for monitoring treatment responses in head and neck malignancies                                                                | Outcome prediction |
| [683] | ML | 2020 | A predictive model of radiation-related fibrosis based on the radiomic features of magnetic resonance imaging and computed tomography                                                       | Outcome prediction |
| [684] | ML | 2020 | Radiomic Analysis of CT Predicts Tumor Response in Human Lung Cancer with Radiotherapy                                                                                                      | Outcome prediction |
| [685] | DL | 2021 | Combining computed tomography and biologically effective dose in radiomics and deep learning improves prediction of tumor response to robotic lung stereotactic body radiation therapy      | Outcome prediction |
| [686] | DL | 2021 | A deep learning-based dual-omics prediction model for radiation pneumonitis                                                                                                                 | Outcome prediction |
| [687] | DL | 2021 | Attention Guided Lymph Node Malignancy Prediction in Head and Neck Cancer                                                                                                                   | Outcome prediction |
| [688] | DL | 2021 | Integrating Multiomics Information in Deep Learning Architectures for Joint Actuarial Outcome Prediction in Non-Small Cell Lung Cancer Patients After Radiation Therapy                     | Outcome prediction |
| [689] | DL | 2021 | Fully Automatic Head and Neck Cancer Prognosis Prediction in PET/CT                                                                                                                         | Outcome prediction |
| [690] | DL | 2021 | Identification of Risk of Cardiovascular Disease by Automatic Quantification of Coronary Artery Calcifications on Radiotherapy Planning CT Scans in Patients with Breast Cancer             | Outcome prediction |
| [691] | DL | 2021 | Prediction of soft tissue sarcoma response to radiotherapy using longitudinal diffusion MRI and a deep neural network with generative adversarial network-based data augmentation           | Outcome prediction |
| [692] | DL | 2021 | Radiogenomic and deep learning network approaches to predict kras mutation from radiotherapy plan ct                                                                                        | Outcome prediction |
| [693] | DL | 2021 | Novel methodology to assess the effect of contouring variation on treatment outcome                                                                                                         | Outcome prediction |
| [694] | DL | 2021 | Extended application of a CT-based artificial intelligence prognostication model in patients with primary lung cancer undergoing stereotactic ablative radiotherapy                         | Outcome prediction |
| [695] | DL | 2021 | 3D Deep Learning Model for the Pretreatment Evaluation of Treatment Response in Esophageal Carcinoma: A Prospective Study (ChiCTR2000039279)                                                | Outcome prediction |
| [696] | DL | 2021 | The role of deep learning-based survival model in improving survival prediction of patients with glioblastoma                                                                               | Outcome prediction |
| [697] | DL | 2021 | Radiomics AI prediction for head and neck squamous cell carcinoma (HNSCC) prognosis and recurrence with target volume approach                                                              | Outcome prediction |
| [698] | DL | 2021 | A deep survival interpretable radiomics model of hepatocellular carcinoma patients                                                                                                          | Outcome prediction |
| [699] | DL | 2021 | Integration of Deep Learning Radiomics and Counts of Circulating Tumor Cells Improves Prediction of Outcomes of Early Stage NSCLC Patients Treated With Stereotactic Body Radiation Therapy | Outcome prediction |
| [700] | DL | 2021 | Analysis of Curative Effect and Prognostic Factors of Radiotherapy for Esophageal Cancer Based on the CNN                                                                                   | Outcome prediction |
| [701] | ML | 2021 | Classification of early stage non-small cell lung cancers on computed tomographic images into histological types using radiomic features: interobserver delineation variability analysis    | Outcome prediction |
| [702] | ML | 2021 | Comparison of nomogram with machine learning techniques for prediction of overall survival in patients with tongue cancer                                                                   | Outcome prediction |

|       |    |      |                                                                                                                                                                                                |                    |
|-------|----|------|------------------------------------------------------------------------------------------------------------------------------------------------------------------------------------------------|--------------------|
| [703] | ML | 2021 | A data science approach for early-stage prediction of Patient's susceptibility to acute side effects of advanced radiotherapy                                                                  | Outcome prediction |
| [704] | ML | 2021 | Radiomics analysis on CT images for prediction of radiation-induced kidney damage by machine learning models                                                                                   | Outcome prediction |
| [705] | ML | 2021 | Radiomic modeling to predict risk of vertebral compression fracture after stereotactic body radiation therapy for spinal metastases                                                            | Outcome prediction |
| [706] | ML | 2021 | Biological dosiomic features for the prediction of radiation pneumonitis in esophageal cancer patients                                                                                         | Outcome prediction |
| [707] | ML | 2021 | Statistical Modeling of Longitudinal Data with Non-Ignorable Non-Monotone Missingness with Semiparametric Bayesian and Machine Learning Components                                             | Outcome prediction |
| [708] | ML | 2021 | An artificial immune system with bootstrap sampling for the diagnosis of recurrent endometrial cancers                                                                                         | Outcome prediction |
| [709] | ML | 2021 | Using computed tomography-based radiomics to predict outcomes for hepatocellular carcinoma patients receiving stereotactic body radiotherapy                                                   | Outcome prediction |
| [710] | ML | 2021 | A machine learning-based survival prediction model of high grade glioma by integration of clinical and dose-volume histogram parameters                                                        | Outcome prediction |
| [711] | ML | 2021 | Radiation Versus Immune Checkpoint Inhibitor Associated Pneumonitis: Distinct Radiologic Morphologies                                                                                          | Outcome prediction |
| [712] | ML | 2021 | Computed tomography-based radiomic model predicts radiological response following stereotactic body radiation therapy in early-stage non-small-cell lung cancer and pulmonary oligo-metastases | Outcome prediction |
| [713] | ML | 2021 | Predicting outcomes in anal cancer patients using multi-centre data and distributed learning – A proof-of-concept study                                                                        | Outcome prediction |
| [714] | ML | 2021 | Performance stability evaluation of atlas-based machine learning radiation therapy treatment planning in prostate cancer                                                                       | Dose prediction    |
| [715] | ML | 2021 | Dosimetric Planning Tradeoffs to Reduce Heart Dose Using Machine Learning-Guided Decision Support Software in Patients with Lung Cancer                                                        | Outcome prediction |
| [716] | ML | 2021 | Quantitative ultrasound radiomics in predicting recurrence for patients with node-positive head-neck squamous cell carcinoma treated with radical radiotherapy                                 | Outcome prediction |
| [717] | ML | 2021 | Prediction of recurrence by machine learning in salivary gland cancer patients after adjuvant (chemo) radiotherapy                                                                             | Outcome prediction |
| [718] | ML | 2021 | Kurtosis is An MRI Radiomics Feature Predictor of Poor Prognosis in Patients with GBM                                                                                                          | Outcome prediction |
| [719] | ML | 2021 | MRI-based clinical-radiomics model predicts tumor response before treatment in locally advanced rectal cancer                                                                                  | Outcome prediction |
| [720] | ML | 2021 | Predict multicategory causes of death in lung cancer patients using clinicopathologic factors                                                                                                  | Outcome prediction |
| [721] | ML | 2021 | Framework for machine learning of ct and pet radiomics to predict local failure after radiotherapy in locally advanced head and neck cancers                                                   | Outcome prediction |
| [722] | ML | 2021 | Immune landscape and subtypes in primary resectable oral squamous cell carcinoma: Prognostic significance and predictive of therapeutic response                                               | Outcome prediction |

|       |    |      |                                                                                                                                                                               |                    |
|-------|----|------|-------------------------------------------------------------------------------------------------------------------------------------------------------------------------------|--------------------|
| [723] | ML | 2021 | External Validation of the Bone Metastases Ensemble Trees for Survival (BMETS) Machine Learning Model to Predict Survival in Patients With Symptomatic Bone Metastases        | Outcome prediction |
| [724] | ML | 2021 | Developing and validating ultrasound-based radiomics models for predicting high-risk endometrial cancer                                                                       | Outcome prediction |
| [725] | ML | 2021 | Ultrasound delta-radiomics during radiotherapy to predict recurrence in patients with head and neck squamous cell carcinoma                                                   | Outcome prediction |
| [726] | ML | 2021 | Automated model versus treating physician for predicting survival time of patients with metastatic cancer                                                                     | Outcome prediction |
| [727] | ML | 2021 | Interpretable machine learning model for locoregional relapse prediction in oropharyngeal cancers                                                                             | Outcome prediction |
| [728] | ML | 2021 | Radiomics outperforms semantic features for prediction of response to stereotactic radiosurgery in brain metastases                                                           | Outcome prediction |
| [729] | ML | 2021 | Novel Immune-Related Gene-Based Signature Characterizing an Inflamed Microenvironment Predicts Prognosis and Radiotherapy Efficacy in Glioblastoma                            | Outcome prediction |
| [730] | ML | 2021 | Genetic Variations in the Transforming Growth Factor- $\beta$ 1 Pathway May Improve Predictive Power for Overall Survival in Non-small Cell Lung Cancer                       | Outcome prediction |
| [731] | ML | 2021 | Prediction of post-radiotherapy locoregional progression in HPV-associated oropharyngeal squamous cell carcinoma using machine-learning analysis of baseline PET/CT radiomics | Outcome prediction |
| [732] | ML | 2021 | Improving Early Identification of Significant Weight Loss Using Clinical Decision Support System in Lung Cancer Radiation Therapy                                             | Outcome prediction |
| [733] | ML | 2021 | Estimating heterogeneous survival treatment effect in observational data using machine learning                                                                               | Outcome prediction |
| [734] | ML | 2021 | Comparison of machine learning methods for prediction of osteoradionecrosis incidence in patients with head and neck cancer                                                   | Outcome prediction |
| [735] | ML | 2021 | MRI-based delta-radiomics predicts pathologic complete response in high-grade soft-tissue sarcoma patients treated with neoadjuvant therapy                                   | Outcome prediction |
| [736] | ML | 2021 | A priori prediction of local failure in brain metastasis after hypo-fractionated stereotactic radiotherapy using quantitative MRI and machine learning                        | Outcome prediction |
| [737] | ML | 2021 | Stromal composition predicts recurrence of early rectal cancer after local excision                                                                                           | Outcome prediction |
| [738] | ML | 2021 | Intrinsic radiomic expression patterns after 20 Gy demonstrate early metabolic response of oropharyngeal cancers                                                              | Outcome prediction |
| [739] | ML | 2021 | Machine-Learning Models for Multicenter Prostate Cancer Treatment Plans                                                                                                       | Outcome prediction |
| [740] | ML | 2021 | Functional Connectivity Density for Radiation Encephalopathy Prediction in Nasopharyngeal Carcinoma                                                                           | Outcome prediction |
| [741] | ML | 2021 | A Novel Machine Learning Algorithm Combined With Multivariate Analysis for the Prognosis of Renal Collecting Duct Carcinoma                                                   | Outcome prediction |
| [742] | ML | 2021 | Photographic image processing to predict radiation dermatitis in breast cancer patients using machine learning algorithms                                                     | Outcome prediction |
| [743] | ML | 2021 | Telomere length dynamics and chromosomal instability for predicting individual radiosensitivity and risk via machine learning                                                 | Outcome prediction |

|       |    |      |                                                                                                                                                                                                                          |                    |
|-------|----|------|--------------------------------------------------------------------------------------------------------------------------------------------------------------------------------------------------------------------------|--------------------|
| [744] | ML | 2021 | Evaluation of acute hematological toxicity by machine learning in gynecologic cancers using postoperative radiotherapy                                                                                                   | Outcome prediction |
| [745] | ML | 2021 | Development and validation of genomic predictors of radiation sensitivity using preclinical data                                                                                                                         | Outcome prediction |
| [746] | ML | 2021 | Machine learning and feature selection methods for egfr mutation status prediction in lung cancer                                                                                                                        | Outcome prediction |
| [747] | ML | 2021 | Exploratory ensemble interpretable model for predicting local failure in head and neck cancer: The additive benefit of CT and intra-treatment cone-beam computed tomography features                                     | Outcome prediction |
| [748] | ML | 2021 | MRI-Based Radiomics Input for Prediction of 2-Year Disease Recurrence in Anal Squamous Cell Carcinoma                                                                                                                    | Outcome prediction |
| [749] | ML | 2021 | Independent validation of a comprehensive machine learning approach predicting survival after radiotherapy for bone metastases                                                                                           | Outcome prediction |
| [750] | ML | 2021 | Progression-free survival prediction in patients with nasopharyngeal carcinoma after intensity-modulated radiotherapy: Machine learning vs. traditional statistics                                                       | Outcome prediction |
| [751] | ML | 2021 | Assessment of clinical radiosensitivity in patients with head-neck squamous cell carcinoma from pre-treatment quantitative ultrasound radiomics                                                                          | Outcome prediction |
| [752] | ML | 2021 | Classification of tolerable/intolerable mucosal toxicity of head-and-neck radiotherapy schedules with a biomathematical model of cell dynamics                                                                           | Outcome prediction |
| [753] | ML | 2021 | Dosimetrics-based prediction of radiation-induced hypothyroidism in nasopharyngeal carcinoma patients                                                                                                                    | Outcome prediction |
| [754] | ML | 2021 | Training radiomics-based CNNs for clinical outcome prediction: Challenges, strategies and findings                                                                                                                       | Outcome prediction |
| [755] | ML | 2021 | Tumor stemness and immune infiltration synergistically predict response of radiotherapy or immunotherapy and relapse in lung adenocarcinoma                                                                              | Outcome prediction |
| [756] | ML | 2021 | Machine learning for dose-volume histogram based clinical decision-making support system in radiation therapy plans for brain tumors                                                                                     | Treatment planning |
| [757] | ML | 2021 | Low-grade chronic inflammation and immune alterations in childhood and adolescent cancer survivors: A contribution to accelerated aging?                                                                                 | Outcome prediction |
| [758] | ML | 2021 | Multi-institutional dose-segmented dosimetric analysis for predicting radiation pneumonitis after lung stereotactic body radiation therapy                                                                               | Outcome prediction |
| [759] | ML | 2021 | Machine Learning Approaches for Prognostication of Newly Diagnosed Glioblastoma                                                                                                                                          | Outcome prediction |
| [760] | ML | 2021 | Incorporating dose-volume histogram parameters of swallowing organs at risk in a videofluoroscopy-based predictive model of radiation-induced dysphagia after head and neck cancer intensity-modulated radiation therapy | Outcome prediction |
| [761] | ML | 2021 | Distinct lipid profiles of radiation-induced carotid plaques from atherosclerotic carotid plaques revealed by UPLC-QTOF-MS and DESI-MSI                                                                                  | Outcome prediction |
| [762] | ML | 2021 | Normal tissue complication probability (NTCP) models for predicting temporal lobe injury after intensity-modulated radiotherapy in nasopharyngeal carcinoma: A large registry-based retrospective study from China       | Outcome prediction |
| [763] | ML | 2021 | Surface-Based Falff: A Potential Novel Biomarker for Prediction of Radiation Encephalopathy in Patients With Nasopharyngeal Carcinoma                                                                                    | Outcome prediction |

|       |    |      |                                                                                                                                                                                                                                      |                             |
|-------|----|------|--------------------------------------------------------------------------------------------------------------------------------------------------------------------------------------------------------------------------------------|-----------------------------|
| [764] | ML | 2021 | Prediction of response to neoadjuvant chemoradiotherapy with machine learning in rectal cancer: A pilot study                                                                                                                        | Outcome prediction          |
| [765] | ML | 2021 | Prediction of Radiation Pneumonitis With Machine Learning in Stage III Lung Cancer: A Pilot Study                                                                                                                                    | Outcome prediction          |
| [766] | ML | 2021 | Prediction of survival and progression-free survival using machine learning in stage iii lung cancer: A pilot study                                                                                                                  | Outcome prediction          |
| [767] | ML | 2021 | Weighted-Support Vector Machine Learning Classifier of Circulating Cytokine Biomarkers to Predict Radiation-Induced Lung Fibrosis in Non-Small-Cell Lung Cancer Patients                                                             | Outcome prediction          |
| [768] | ML | 2021 | Machine learning-based FDG PET-CT radiomics for outcome prediction in larynx and hypopharynx squamous cell carcinoma                                                                                                                 | Outcome prediction          |
| [769] | ML | 2021 | A Clinical-Radiomics Nomogram Based on Computed Tomography for Predicting Risk of Local Recurrence After Radiotherapy in Nasopharyngeal Carcinoma                                                                                    | Outcome prediction          |
| [770] | ML | 2021 | Identifying Individualized Risk Profiles for Radiotherapy-Induced Lymphopenia Among Patients With Esophageal Cancer Using Machine Learning                                                                                           | Outcome prediction          |
| [771] | DL | 2018 | The Patient-Reported Information Multidimensional Exploration (PRIME) Framework for Investigating Emotions and Other Factors of Prostate Cancer Patients with Low Intermediate Risk Based on Online Cancer Support Group Discussions | Patient care and management |
| [772] | ML | 2019 | askMUSIC: Leveraging a Clinical Registry to Develop a New Machine Learning Model to Inform Patients of Prostate Cancer Treatments Chosen by Similar Men                                                                              | Patient care and management |
| [773] | ML | 2019 | MRI-derived radiomics to guide post-operative management for high-risk prostate cancer                                                                                                                                               | Patient care and management |
| [774] | ML | 2019 | Machine Learning to Predict Delays in Adjuvant Radiation following Surgery for Head and Neck Cancer                                                                                                                                  | Patient care and management |
| [775] | DL | 2020 | Development of a real-time indoor location system using bluetooth low energy technology and deep learning to facilitate clinical applications                                                                                        | Patient care and management |
| [776] | DL | 2020 | MRI-based radiomics of sarcomas in the preclinical arm of a Co-clinical trial                                                                                                                                                        | Patient care and management |
| [777] | DL | 2020 | Facial expression monitoring system for predicting patient's sudden movement during radiotherapy using deep learning                                                                                                                 | Patient care and management |
| [778] | ML | 2020 | Edge computing for having an edge on cancer treatment: A mobile app for breast image analysis                                                                                                                                        | Patient care and management |
| [779] | ML | 2020 | System for High-Intensity Evaluation during Radiation Therapy (SHIELD-RT): A Prospective Randomized Study of Machine Learning-Directed Clinical Evaluations during Radiation and Chemoradiation                                      | Patient care and management |
| [780] | ML | 2020 | Automatic incident triage in radiation oncology incident learning system                                                                                                                                                             | Patient care and management |

|       |    |      |                                                                                                                                                                           |                             |
|-------|----|------|---------------------------------------------------------------------------------------------------------------------------------------------------------------------------|-----------------------------|
| [781] | ML | 2020 | A bibliometric analysis of 23,492 publications on rectal cancer by machine learning: basic medical research is needed                                                     | Patient care and management |
| [782] | DL | 2021 | Deep neural network models to automate incident triage in the radiation oncology incident learning system                                                                 | Patient care and management |
| [783] | ML | 2021 | Investigating the role of transportation barriers in cancer patients' decision making regarding the treatment process                                                     | Patient care and management |
| [784] | DL | 2019 | A study of positioning orientation effect on segmentation accuracy using convolutional neural networks for rectal cancer                                                  | Patient positioning         |
| [785] | DL | 2019 | A deep learning framework for automatic detection of arbitrarily shaped fiducial markers in intrafraction fluoroscopic images                                             | Patient positioning         |
| [786] | DL | 2019 | Markerless Pancreatic Tumor Target Localization Enabled By Deep Learning                                                                                                  | Patient positioning         |
| [787] | DL | 2020 | Breast cancer patient auto-setup using residual neural network for CT-guided therapy                                                                                      | Patient positioning         |
| [788] | DL | 2020 | Technical Note: Deep Learning approach for automatic detection and identification of patient positioning devices for radiation therapy                                    | Patient positioning         |
| [789] | DL | 2018 | A deep learning-based prediction model for gamma evaluation in patient-specific quality assurance                                                                         | Plan and machine QA         |
| [790] | ML | 2018 | Guided undersampling classification for automated radiation therapy quality assurance of prostate cancer treatment                                                        | Plan and machine QA         |
| [791] | DL | 2019 | Deep learning for patient-specific quality assurance: Identifying errors in radiotherapy delivery by radiomic analysis of gamma images with convolutional neural networks | Plan and machine QA         |
| [792] | ML | 2019 | Machine learning for automated quality assurance in radiotherapy: A proof of principle using EPID data description                                                        | Plan and machine QA         |
| [793] | ML | 2019 | Predicting gamma passing rates for portal dosimetry-based IMRT QA using machine learning                                                                                  | Plan and machine QA         |
| [794] | DL | 2020 | Verification of the machine delivery parameters of a treatment plan via deep learning                                                                                     | Plan and machine QA         |
| [795] | DL | 2020 | Error detection using a convolutional neural network with dose difference maps in patient-specific quality assurance for volumetric modulated arc therapy                 | Plan and machine QA         |
| [796] | ML | 2020 | Error detection and classification in patient-specific IMRT QA with dual neural networks                                                                                  | Plan and machine QA         |
| [797] | ML | 2020 | Application and comparison of machine learning models for predicting quality assurance outcomes in radiation therapy treatment planning                                   | Plan and machine QA         |
| [798] | ML | 2020 | Beam data modeling of linear accelerators (linacs) through machine learning and its potential applications in fast and robust linac commissioning and quality assurance   | Plan and machine QA         |
| [799] | DL | 2021 | Deep learning-augmented radioluminescence imaging for radiotherapy dose verification                                                                                      | Plan and machine QA         |
| [800] | DL | 2021 | Error detection model developed using a multi-task convolutional neural network in patient-specific quality assurance for volumetric-modulated arc therapy                | Plan and machine QA         |

|       |    |      |                                                                                                                                                                        |                            |
|-------|----|------|------------------------------------------------------------------------------------------------------------------------------------------------------------------------|----------------------------|
| [801] | DL | 2021 | Systematic method for a deep learning-based prediction model for gamma evaluation in patient-specific quality assurance of volumetric modulated arc therapy            | Plan and machine QA        |
| [802] | DL | 2021 | Virtual Patient-Specific Quality Assurance of IMRT Using UNet++: Classification, Gamma Passing Rates Prediction, and Dose Difference Prediction                        | Plan and machine QA        |
| [803] | ML | 2021 | Improvement Using Planomics Features on Prediction and Classification of Patient-Specific Quality Assurance Using Head and Neck Volumetric Modulated Arc Therapy Plan, | Plan and machine QA        |
| [804] | ML | 2021 | A tool for patient-specific prediction of delivery discrepancies in machine parameters using trajectory log files                                                      | Plan and machine QA        |
| [805] | ML | 2021 | Visual light perceptions caused by medical linear accelerator: Findings of machinelearning algorithms in a prospective questionnaire-based case-control study          | Plan and machine QA        |
| [806] | ML | 2021 | The structural similarity index for IMRT quality assurance: radiomics-based error classification                                                                       | Plan and machine QA        |
| [807] | ML | 2021 | Quality assurance-based optimization (QAO): Towards improving patient-specific quality assurance in volumetric modulated arc therapy plans using machine learning      | Plan and machine QA        |
| [808] | ML | 2021 | Prospective study of artificial intelligence-based decision support to improve head and neck radiotherapy plan quality                                                 | Plan and machine QA        |
| [809] | ML | 2021 | Deep Network Construction using Autoencoder for Abnormality Detection in Radiotherapy Service                                                                          | Plan and machine QA        |
| [810] | DL | 2018 | Comparison of synthetic CT generation algorithms for MRI-only radiation planning in the pelvic region                                                                  | Synthetic image generation |
| [811] | DL | 2018 | Generating synthetic CTs from magnetic resonance images using generative adversarial networks                                                                          | Synthetic image generation |
| [812] | DL | 2018 | Synthetic CT generation using MRI with deep learning: How does the selection of input images affect the resulting synthetic CT?                                        | Synthetic image generation |
| [813] | DL | 2018 | Technical Note: U-net-generated synthetic CT images for magnetic resonance imaging-only prostate intensity-modulated radiation therapy treatment planning              | synthetic image generation |
| [814] | DL | 2018 | Towards MR-only radiotherapy treatment planning: Synthetic CT generation using multi-view deep convolutional neural networks                                           | Synthetic image generation |
| [815] | ML | 2018 | Comparative study of algorithms for synthetic CT generation from MRI: Consequences for MRI-guided radiation planning in the pelvic region                              | Synthetic image generation |
| [816] | ML | 2018 | A method to combine target volume data from 3D and 4D planned thoracic radiotherapy patient cohorts for machine learning applications                                  | Image segmentation         |
| [817] | DL | 2019 | Dosimetric evaluation of synthetic CT for head and neck radiotherapy generated by a patch-based three-dimensional convolutional neural network                         | Synthetic image generation |
| [818] | DL | 2019 | The impact of MRI-CT registration errors on deep learning-based synthetic CT generation                                                                                | Synthetic image generation |
| [819] | DL | 2019 | Deep learning approaches using 2D and 3D convolutional neural networks for generating male pelvic synthetic computed tomography from magnetic resonance imaging        | Synthetic image generation |
| [820] | DL | 2019 | Unpaired Mr to CT synthesis with explicit structural constrained adversarial learning                                                                                  | Synthetic image generation |
| [821] | DL | 2019 | Unpaired whole-body MR to CT synthesis with correlation coefficient constrained adversarial learning                                                                   | Synthetic image generation |

|       |    |      |                                                                                                                                                                         |                            |
|-------|----|------|-------------------------------------------------------------------------------------------------------------------------------------------------------------------------|----------------------------|
| [822] | DL | 2019 | Generation of synthetic CT images from MRI for treatment planning and patient positioning using a 3-channel U-net trained on sagittal images                            | Synthetic image generation |
| [823] | DL | 2019 | Augmentation of CBCT Reconstructed from Under-Sampled Projections Using Deep Learning                                                                                   | Synthetic image generation |
| [824] | DL | 2019 | MRI-only brain radiotherapy: Assessing the dosimetric accuracy of synthetic CT images generated using a deep learning approach                                          | Synthetic image generation |
| [825] | DL | 2019 | CBCT correction using a cycle-consistent generative adversarial network and unpaired training to enable photon and proton dose calculation                              | Synthetic image generation |
| [826] | DL | 2019 | Comparing Unet training with three different datasets to correct CBCT images for prostate radiotherapy dose calculations                                                | Synthetic image generation |
| [827] | DL | 2019 | Deep learning for MRI-based CT synthesis: A comparison of MRI sequences and neural network architectures                                                                | Synthetic image generation |
| [828] | DL | 2019 | MRI-only based synthetic CT generation using dense cycle consistent generative adversarial networks                                                                     | Synthetic image generation |
| [829] | DL | 2019 | CBCT-based synthetic MRI generation for CBCT-guided adaptive radiotherapy                                                                                               | Synthetic image generation |
| [830] | DL | 2019 | Image quality improvement in cone-beam CT using deep learning                                                                                                           | Synthetic image generation |
| [831] | DL | 2019 | CT synthesis from MRI images based on deep learning methods for MRI-only radiotherapy                                                                                   | Synthetic image generation |
| [832] | DL | 2019 | MR-based treatment planning in radiation therapy using a deep learning approach                                                                                         | Synthetic image generation |
| [833] | DL | 2019 | MRI-based treatment planning for liver stereotactic body radiotherapy: Validation of a deep learning-based synthetic CT generation method                               | Synthetic image generation |
| [834] | DL | 2019 | Evaluation of a deep learning-based pelvic synthetic CT generation technique for MRI-based prostate proton treatment planning                                           | Synthetic image generation |
| [835] | DL | 2019 | MRI-based treatment planning for proton radiotherapy: Dosimetric validation of a deep learning-based liver synthetic CT generation method                               | Synthetic image generation |
| [836] | DL | 2019 | DeepMCDose: A deep learning method for efficient monte carlo beamlet dose calculation by predictive denoising in MR-guided radiotherapy                                 | Synthetic image generation |
| [837] | DL | 2019 | Patient-specific reconstruction of volumetric computed tomography images from a single projection view via deep learning                                                | Synthetic image generation |
| [838] | DL | 2019 | Deep learning-based image quality improvement for low-dose computed tomography simulation in radiation therapy                                                          | Synthetic image generation |
| [839] | DL | 2019 | Synthetic CT Generation Based on T2 Weighted MRI of Nasopharyngeal Carcinoma (NPC) Using a Deep Convolutional Neural Network (DCNN)                                     | Synthetic image generation |
| [840] | DL | 2019 | Artifacts reduction method for phase-resolved Cone-Beam CT (CBCT) images via a prior-guided CNN                                                                         | Synthetic image generation |
| [841] | ML | 2019 | Generation of virtual lung single-photon emission computed tomography/CT fusion images for functional avoidance radiotherapy planning using machine learning algorithms | Synthetic image generation |
| [842] | ML | 2019 | MRI-based pseudo CT generation using classification and regression random forest                                                                                        | Synthetic image generation |
| [843] | ML | 2019 | Synthetic CT reconstruction using a deep spatial pyramid convolutional framework for MR-only breast radiotherapy                                                        | Synthetic Image generation |

|       |    |      |                                                                                                                                                                                                                                                                                                                    |                            |
|-------|----|------|--------------------------------------------------------------------------------------------------------------------------------------------------------------------------------------------------------------------------------------------------------------------------------------------------------------------|----------------------------|
| [844] | ML | 2019 | Dose evaluation of MRI-based synthetic CT generated using a machine learning method for prostate cancer radiotherapy                                                                                                                                                                                               | Synthetic image generation |
| [845] | ML | 2019 | MRI-based treatment planning for brain stereotactic radiosurgery: Dosimetric validation of a learning-based pseudo-CT generation method                                                                                                                                                                            | Synthetic image generation |
| [846] | DL | 2020 | Dosimetry-Driven Quality Measure of Brain Pseudo Computed Tomography Generated From Deep Learning for MRI-Only Radiation Therapy Treatment Planning                                                                                                                                                                | Synthetic image generation |
| [847] | DL | 2020 | Synthetic CT generation from CBCT images via deep learning                                                                                                                                                                                                                                                         | Synthetic image generation |
| [848] | DL | 2020 | Deep learning-enabled MRI-only photon and proton therapy treatment planning for paediatric abdominal tumours                                                                                                                                                                                                       | Synthetic image generation |
| [849] | DL | 2020 | Generation of abdominal synthetic CTs from 0.35T MR images using generative adversarial networks for MR-only liver radiotherapy                                                                                                                                                                                    | Synthetic image generation |
| [850] | DL | 2020 | Correction for cone beam CT image artifacts via a deep learning method                                                                                                                                                                                                                                             | Synthetic image generation |
| [851] | DL | 2020 | Cone-beam CT-derived relative stopping power map generation via deep learning for proton radiotherapy                                                                                                                                                                                                              | Synthetic image generation |
| [852] | DL | 2020 | Deep learning-based metal artifact reduction using cycle-consistent adversarial network for intensity-modulated head and neck radiation therapy treatment planning                                                                                                                                                 | Synthetic image generation |
| [853] | DL | 2020 | Deep learning-based virtual noncontrast CT for volumetric modulated arc therapy planning: Comparison with a dual-energy CT-based approach                                                                                                                                                                          | Synthetic image generation |
| [854] | DL | 2020 | Head-and-Neck MRI-only radiotherapy treatment planning: From acquisition in treatment position to pseudo-CT generation [Planification de radiothérapie externe pour la sphère ORL à partir d'imagerie par résonance magnétique: de l'acquisition en position de traitement à la génération de pseudo-scanographie] | Synthetic image generation |
| [855] | DL | 2020 | Magnetic resonance image (MRI) synthesis from brain computed tomography (CT) images based on deep learning methods for magnetic resonance (MR)-guided radiotherapy                                                                                                                                                 | Synthetic image generation |
| [856] | DL | 2020 | Synthesize CT from paired MRI of the same patient with patch-based generative adversarial network                                                                                                                                                                                                                  | Synthetic image generation |
| [857] | DL | 2020 | Abdominal synthetic CT generation from MR Dixon images using a U-net trained with 'semi-synthetic' CT data                                                                                                                                                                                                         | Synthetic image generation |
| [858] | DL | 2020 | CBCT-based synthetic CT generation using deep-attention cycleGAN for pancreatic adaptive radiotherapy                                                                                                                                                                                                              | Synthetic image generation |
| [859] | DL | 2020 | A deep learning method for producing ventilation images from 4DCT: First comparison with technegas SPECT ventilation                                                                                                                                                                                               | Synthetic image generation |
| [860] | DL | 2020 | Self-contained deep learning-based boosting of 4D cone-beam CT reconstruction                                                                                                                                                                                                                                      | Synthetic image generation |
| [861] | DL | 2020 | A single neural network for cone-beam computed tomography-based radiotherapy of head-and-neck, lung and breast cancer                                                                                                                                                                                              | Synthetic image generation |
| [862] | DL | 2020 | Comparison of deep learning synthesis of synthetic CTs using clinical MRI inputs                                                                                                                                                                                                                                   | Synthetic image generation |
| [863] | DL | 2020 | Evaluation of Deep Learning to Augment Image-Guided Radiotherapy for Head and Neck and Prostate Cancers                                                                                                                                                                                                            | Synthetic image generation |
| [864] | DL | 2020 | Feasibility of Multiparametric Positron Emission Tomography/Magnetic Resonance Imaging as a One-Stop Shop for Radiation Therapy Planning for Patients with Head and Neck Cancer                                                                                                                                    | Synthetic image generation |

|       |    |      |                                                                                                                                                                                              |                            |
|-------|----|------|----------------------------------------------------------------------------------------------------------------------------------------------------------------------------------------------|----------------------------|
| [865] | DL | 2020 | Multi-sequence MR image-based synthetic CT generation using a generative adversarial network for head and neck MRI-only radiotherapy                                                         | Synthetic image generation |
| [866] | DL | 2020 | Estimating CT from MR Abdominal Images Using Novel Generative Adversarial Networks                                                                                                           | Synthetic image generation |
| [867] | DL | 2020 | Simulated four-dimensional CT for markerless tumor tracking using a deep learning network with multi-task learning                                                                           | Synthetic image generation |
| [868] | DL | 2020 | Evaluating the Impact of Training Loss on MR to Synthetic CT Conversion                                                                                                                      | Synthetic image generation |
| [869] | DL | 2020 | A generative adversarial network-based (GAN-based) architecture for automatic fiducial marker detection in prostate MRI-only radiotherapy simulation images                                  | Synthetic image generation |
| [870] | DL | 2020 | Automatic online quality control of synthetic CTs                                                                                                                                            | Synthetic image generation |
| [871] | DL | 2020 | Deep learning-based relative stopping power mapping generation with cone-beam CT in proton radiation therapy                                                                                 | Synthetic image generation |
| [872] | DL | 2020 | Pseudo-CT generation from multi-parametric MRI using a novel multi-channel multi-path conditional generative adversarial network for nasopharyngeal carcinoma patients                       | Synthetic image generation |
| [873] | DL | 2020 | Feasibility of synthetic computed tomography generated with an adversarial network for multi-sequence magnetic resonance-based brain radiotherapy                                            | Synthetic image generation |
| [874] | DL | 2020 | Convolutional neural network enhancement of fast-scan low-dose cone-beam CT images for head and neck radiotherapy                                                                            | Synthetic image generation |
| [875] | ML | 2020 | Towards a generalised development of synthetic CT images and assessment of their dosimetric accuracy                                                                                         | Synthetic image generation |
| [876] | ML | 2020 | Technical Note: Synthesizing of lung tumors in computed tomography images                                                                                                                    | Synthetic image generation |
| [877] | ML | 2020 | A Neural Network Approach for Image Reconstruction from a Single X-Ray Projection                                                                                                            | Synthetic image generation |
| [878] | ML | 2020 | Machine-learning based MRI radiomics models for early detection of radiation-induced brain injury in nasopharyngeal carcinoma                                                                | Synthetic image generation |
| [879] | DL | 2021 | Synthetic CT Generation of the Pelvis in Patients with Cervical Cancer: A Single Input Approach Using Generative Adversarial Network                                                         | Synthetic image generation |
| [880] | DL | 2021 | Multicentre, deep learning, synthetic-CT generation for ano-rectal MR-only radiotherapy treatment planning                                                                                   | Synthetic image generation |
| [881] | DL | 2021 | Improving generalization in MR-to-CT synthesis in radiotherapy by using an augmented cycle generative adversarial network with unpaired data                                                 | Synthetic image generation |
| [882] | DL | 2021 | Improved CycleGAN for MR to CT synthesis                                                                                                                                                     | Synthetic image generation |
| [883] | DL | 2021 | Synthetic CT generation from CBCT images via unsupervised deep learning                                                                                                                      | Synthetic image generation |
| [884] | DL | 2021 | Voxel-wise analysis for spatial characterisation of pseudo-ct errors in MRI-only radiotherapy planning                                                                                       | Synthetic image generation |
| [885] | DL | 2021 | Automated delineation of head and neck organs at risk using synthetic MRI-aided mask scoring regional convolutional neural network                                                           | Synthetic image generation |
| [886] | DL | 2021 | Geometric and Dosimetric Evaluation of Deep Learning-Based Automatic Delineation on CBCT-Synthesized CT and Planning CT for Breast Cancer Adaptive Radiotherapy: A Multi-Institutional Study | Synthetic image generation |

|       |    |      |                                                                                                                                                                                                                   |                            |
|-------|----|------|-------------------------------------------------------------------------------------------------------------------------------------------------------------------------------------------------------------------|----------------------------|
| [887] | DL | 2021 | A Deep Unsupervised Learning Model for Artifact Correction of Pelvis Cone-Beam CT                                                                                                                                 | Synthetic image generation |
| [888] | DL | 2021 | Deep learning-based synthetic CT generation for MR-only radiotherapy of prostate cancer patients with 0.35T MRI linear accelerator                                                                                | Synthetic image generation |
| [889] | DL | 2021 | Evaluation of novel AI-based extended field-of-view CT reconstructions                                                                                                                                            | Synthetic image generation |
| [890] | DL | 2021 | Rapid 4D-MRI reconstruction using a deep radial convolutional neural network: Dracula                                                                                                                             | Synthetic image generation |
| [891] | DL | 2021 | Feasibility of Synthetic Computed Tomography Images Generated from Magnetic Resonance Imaging Scans Using Various Deep Learning Methods in the Planning of Radiation Therapy for Prostate Cancer                  | Synthetic image generation |
| [892] | DL | 2021 | Synthetic CT for single-fraction neoadjuvant partial breast irradiation on an MRI-linac                                                                                                                           | Synthetic image generation |
| [893] | DL | 2021 | CT-Based Pelvic T1-Weighted MR Image Synthesis Using UNet, UNet++ and Cycle-Consistent Generative Adversarial Network (Cycle-GAN)                                                                                 | Synthetic image generation |
| [894] | DL | 2021 | Synthetic CT generation from weakly paired MR images using cycle-consistent GAN for MR-guided radiotherapy                                                                                                        | Synthetic image generation |
| [895] | DL | 2021 | Deep learning-based 3D image generation using a single 2D projection image                                                                                                                                        | Synthetic image generation |
| [896] | DL | 2021 | Clinical validation of a commercially available deep learning software for synthetic CT generation for brain                                                                                                      | Synthetic image generation |
| [897] | DL | 2021 | Synthesizing CT images from MR images with deep learning: Model generalization for different datasets through transfer learning                                                                                   | Synthetic image generation |
| [898] | DL | 2021 | CBCT-based synthetic CT generation using generative adversarial networks with disentangled representation                                                                                                         | Synthetic image generation |
| [899] | DL | 2021 | Synthetic dual-energy CT for MRI-only based proton therapy treatment planning using label-GAN                                                                                                                     | Synthetic image generation |
| [900] | DL | 2021 | Performance of deep learning synthetic CTs for MR-only brain radiation therapy                                                                                                                                    | Synthetic image generation |
| [901] | DL | 2021 | Virtual magnetic resonance lumbar spine images generated from computed tomography images using conditional generative adversarial networks                                                                        | Synthetic image generation |
| [902] | DL | 2021 | MRI-Only Radiotherapy Planning for Nasopharyngeal Carcinoma Using Deep Learning                                                                                                                                   | Synthetic image generation |
| [903] | DL | 2021 | Improvement of image quality for pancreatic cancer using deep learning-generated virtual monochromatic images: Comparison with single-energy computed tomography                                                  | Synthetic image generation |
| [904] | DL | 2021 | Abdominal synthetic CT reconstruction with intensity projection prior for MRI-only adaptive radiotherapy                                                                                                          | Synthetic image generation |
| [905] | DL | 2021 | Robustness and Generalizability of Deep Learning Synthetic Computed Tomography for Positron Emission Tomography/Magnetic Resonance Imaging–Based Radiation Therapy Planning of Patients With Head and Neck Cancer | Synthetic image generation |
| [906] | DL | 2021 | Synthetic pulmonary perfusion images from 4DCT for functional avoidance using deep learning                                                                                                                       | Synthetic image generation |
| [907] | DL | 2021 | Chest CBCT-based synthetic CT using cycle-consistent adversarial network with histogram matching                                                                                                                  | Synthetic image generation |
| [908] | DL | 2021 | Deep learning-based bone suppression in chest radiographs using CT-derived features: A feasibility study                                                                                                          | Synthetic image generation |
| [909] | DL | 2021 | Image-based shading correction for narrow-FOV truncated pelvic CBCT with deep convolutional neural networks and transfer learning                                                                                 | Synthetic image generation |

|       |    |      |                                                                                                                                                                                       |                            |
|-------|----|------|---------------------------------------------------------------------------------------------------------------------------------------------------------------------------------------|----------------------------|
| [910] | DL | 2021 | A convolutional neural network for estimating cone-beam CT intensity deviations from virtual CT projections                                                                           | Synthetic image generation |
| [911] | DL | 2021 | Artificial intelligence-based bone-enhanced magnetic resonance image—a computed tomography/magnetic resonance image composite image modality in nasopharyngeal carcinoma radiotherapy | Synthetic image generation |
| [912] | DL | 2021 | Pseudo Computed Tomography Image Generation from Brain Magnetic Resonance Image for Radiation Therapy Treatment Planning Using DCNN-UNET                                              | Synthetic image generation |
| [913] | DL | 2021 | Cone-beam CT image quality improvement using Cycle-Deblur consistent adversarial networks (Cycle-Deblur GAN) for chest CT imaging in breast cancer patients                           | Synthetic image generation |
| [914] | DL | 2021 | DeepDose: A robust deep learning-based dose engine for abdominal tumours in a 1.5 T MRI radiotherapy system                                                                           | Synthetic image generation |
| [915] | DL | 2021 | Synthetic Computed Tomography Generation from 0.35T Magnetic Resonance Images for Magnetic Resonance-Only Radiation Therapy Planning Using Perceptual Loss Models                     | Synthetic image generation |
| [916] | DL | 2021 | Cone Beam CT (CBCT) Based Synthetic CT Generation Using Deep Learning Methods for Dose Calculation of Nasopharyngeal Carcinoma Radiotherapy                                           | Synthetic image generation |
| [917] | DL | 2021 | Generation of contrast-enhanced ct with residual cycle-consistent generative adversarial network (res-cycleGAN)                                                                       | Synthetic image generation |
| [918] | DL | 2021 | High through-plane resolution CT imaging with self-supervised deep learning                                                                                                           | Synthetic image generation |
| [919] | DL | 2021 | Synthetic breath-hold CT generation from free-breathing CT: a novel deep learning approach to predict cardiac dose reduction in deep-inspiration breath-hold radiotherapy             | Synthetic image generation |
| [920] | DL | 2021 | CT synthesis from MRI using multi-cycle GAN for head-and-neck radiation therapy                                                                                                       | Synthetic image generation |
| [921] | DL | 2021 | Metal artifact reduction in 2D CT images with self-supervised cross-domain learning                                                                                                   | Synthetic image generation |
| [922] | DL | 2021 | Improving CBCT quality to CT level using deep learning with generative adversarial network                                                                                            | Synthetic image generation |
| [923] | DL | 2021 | MV CBCT-Based Synthetic CT Generation Using a Deep Learning Method for Rectal Cancer Adaptive Radiotherapy                                                                            | Synthetic image generation |
| [924] | DL | 2021 | Tn-net: A spatiotemporal plus prior image-based convolutional neural network for 4d-cbct reconstructions enhancement                                                                  | Synthetic image generation |
| [925] | DL | 2021 | An MR-only acquisition and artificial intelligence based image-processing protocol for photon and proton therapy using a low field MR                                                 | Synthetic image generation |
| [926] | ML | 2021 | Magnetic resonance-driven pseudo CT image using patch-based multi-modal feature extraction and ensemble learning with stacked generalisation                                          | Synthetic image generation |
| [927] | ML | 2021 | An adversarial machine learning framework and biomechanical model-guided approach for computing 3D lung tissue elasticity from end-expiration 3DCT                                    | Synthetic image generation |
| [928] | ML | 2021 | Synthetic digital reconstructed radiographs for MR-only robotic stereotactic radiation therapy: A proof of concept                                                                    | Synthetic image generation |
| [929] | ML | 2021 | Improved contrast and noise of megavoltage computed tomography (MVCT) through cycle-consistent generative machine learning                                                            | Synthetic image generation |

|       |    |      |                                                                                                                                                                                                                                      |                            |
|-------|----|------|--------------------------------------------------------------------------------------------------------------------------------------------------------------------------------------------------------------------------------------|----------------------------|
| [930] | ML | 2021 | Learning-based stopping power mapping on dual-energy CT for proton radiation therapy                                                                                                                                                 | Synthetic image generation |
| [931] | ML | 2021 | Generating pseudo-computerized tomography (P-CT) scan images from magnetic resonance imaging (MRI) images using machine learning algorithms based on fuzzy theory for radiotherapy treatment planning                                | Synthetic image generation |
| [932] | ML | 2018 | Knowledge-based automated planning for oropharyngeal cancer                                                                                                                                                                          | Treatment planning         |
| [933] | ML | 2018 | Monte Carlo tree search -based non-coplanar trajectory design for station parameter optimized radiation therapy (SPORT)                                                                                                              | Treatment planning         |
| [934] | ML | 2018 | Creation of knowledge-based planning models intended for large scale distribution: Minimizing the effect of outlier plans                                                                                                            | Treatment planning         |
| [935] | ML | 2018 | Performance comparison of knowledge-based dose prediction techniques based on limited patient data                                                                                                                                   | Treatment planning         |
| [936] | ML | 2018 | Selection of external beam radiotherapy approaches for precise and accurate cancer treatment                                                                                                                                         | Treatment planning         |
| [937] | ML | 2018 | On the feasibility of automatically selecting similar patients in highly individualized radiotherapy dose reconstruction for historic data of pediatric cancer survivors                                                             | Treatment planning         |
| [938] | DL | 2019 | A feasibility study on an automated method to generate patient-specific dose distributions for radiotherapy using deep learning                                                                                                      | Treatment planning         |
| [939] | DL | 2019 | Automatic treatment planning based on three-dimensional dose distribution predicted from deep learning technique                                                                                                                     | Treatment Planning         |
| [940] | DL | 2019 | Generating Pareto Optimal Dose Distributions for Radiation Therapy Treatment Planning                                                                                                                                                | Treatment Planning         |
| [941] | DL | 2019 | A feasibility study for predicting optimal radiation therapy dose distributions of prostate cancer patients from patient anatomy using deep learning                                                                                 | Treatment planning         |
| [942] | DL | 2019 | Using supervised learning and guided monte carlo tree search for beam orientation optimization in radiation therapy                                                                                                                  | treatment planning         |
| [943] | DL | 2019 | Intelligent inverse treatment planning via deep reinforcement learning, a proof-of-principle study in high dose-rate brachytherapy for cervical cancer                                                                               | Treatment Planning         |
| [944] | ML | 2019 | Approach and assessment of automated stereotactic radiotherapy planning for early stage non-small-cell lung cancer                                                                                                                   | Treatment planning         |
| [945] | ML | 2019 | Comprehensive Intra-Institution stepping validation of knowledge-based models for automatic plan optimization                                                                                                                        | Treatment planning         |
| [946] | ML | 2019 | Automatic planning of whole breast radiation therapy using machine learning models                                                                                                                                                   | Treatment planning         |
| [947] | DL | 2020 | Using deep learning to predict beam-tunable Pareto optimal dose distribution for intensity-modulated radiation therapy                                                                                                               | Treatment planning         |
| [948] | DL | 2020 | Incorporating human and learned domain knowledge into training deep neural networks: A differentiable dose-volume histogram and adversarial inspired framework for generating Pareto optimal dose distributions in radiation therapy | Treatment planning         |
| [949] | DL | 2020 | Automatic multi-catheter detection using deeply supervised convolutional neural network in MRI-guided HDR prostate brachytherapy                                                                                                     | Treatment planning         |

|       |    |      |                                                                                                                                                                                               |                    |
|-------|----|------|-----------------------------------------------------------------------------------------------------------------------------------------------------------------------------------------------|--------------------|
| [950] | DL | 2020 | Deep DoseNet: A deep neural network for accurate dosimetric transformation between different spatial resolutions and/or different dose calculation algorithms for precision radiation therapy | Treatment planning |
| [951] | DL | 2020 | Data-driven dose calculation algorithm based on deep U-Net                                                                                                                                    | Treatment planning |
| [952] | DL | 2020 | Fast Monte Carlo dose calculation based on deep learning                                                                                                                                      | Treatment planning |
| [953] | DL | 2020 | Dose prediction for head and neck radiotherapy using a three-dimensional dense dilated U-net architecture                                                                                     | Treatment planning |
| [954] | DL | 2020 | Automated Intensity Modulated Radiation Therapy Treatment Planning for Cervical Cancer Based on Convolution Neural Network                                                                    | Treatment planning |
| [955] | DL | 2020 | Automatic Verification of Beam Apertures for Cervical Cancer Radiation Therapy                                                                                                                | Treatment planning |
| [956] | DL | 2020 | DeepDose: Towards a fast dose calculation engine for radiation therapy using deep learning                                                                                                    | Treatment planning |
| [957] | DL | 2020 | Automatic IMRT planning via static field fluence prediction (AIP-SFFP): a deep learning algorithm for real-time prostate treatment planning                                                   | Treatment planning |
| [958] | DL | 2020 | A New Deep-Learning-based Model for Predicting 3D Radiotherapy Dose Distribution in Various Scenarios                                                                                         | Treatment planning |
| [959] | DL | 2020 | A Feasibility Study for Predicting 3D Radiotherapy Dose Distribution of Lung VMAT Patients                                                                                                    | Treatment planning |
| [960] | DL | 2020 | A deep learning model to predict dose–volume histograms of organs at risk in radiotherapy treatment plans                                                                                     | Treatment planning |
| [961] | DL | 2020 | Feasibility and analysis of CNN-based candidate beam generation for robotic radiosurgery                                                                                                      | Treatment planning |
| [962] | DL | 2020 | A fast deep learning approach for beam orientation optimization for prostate cancer treated with intensity-modulated radiation therapy                                                        | treatment planning |
| [963] | DL | 2020 | Operating a treatment planning system using a deep-reinforcement learning-based virtual treatment planner for prostate cancer intensity-modulated radiation therapy treatment planning        | Treatment planning |
| [964] | DL | 2020 | Technical Note: A feasibility study on deep learning-based radiotherapy dose calculation                                                                                                      | Treatment planning |
| [965] | DL | 2020 | Boosting radiotherapy dose calculation accuracy with deep learning                                                                                                                            | Treatment planning |
| [966] | DL | 2020 | A method of using deep learning to predict three-dimensional dose distributions for intensity-modulated radiotherapy of rectal cancer                                                         | Treatment planning |
| [967] | ML | 2020 | Novel knowledge-based treatment planning model for hypofractionated radiotherapy of prostate cancer patients                                                                                  | Treatment planning |
| [968] | ML | 2020 | A knowledge-based intensity-modulated radiation therapy treatment planning technique for locally advanced nasopharyngeal carcinoma radiotherapy                                               | Treatment planning |
| [969] | ML | 2020 | Technical note: Interpolated Pareto surface similarity metrics for multi-criteria optimization in radiation therapy                                                                           | treatment planning |
| [970] | ML | 2020 | Knowledge Models as Teaching Aid for Training Intensity Modulated Radiation Therapy Planning: A Lung Cancer Case Study                                                                        | Treatment planning |
| [971] | ML | 2020 | Surrogate-free machine learning-based organ dose reconstruction for pediatric abdominal radiotherapy                                                                                          | Treatment planning |

|       |    |      |                                                                                                                                                                                    |                    |
|-------|----|------|------------------------------------------------------------------------------------------------------------------------------------------------------------------------------------|--------------------|
| [972] | ML | 2020 | Integration of the M6 Cyberknife in the Moderato Monte Carlo platform and prediction of beam parameters using machine learning                                                     | Treatment planning |
| [973] | DL | 2021 | Long short-term memory networks for proton dose calculation in highly heterogeneous tissues                                                                                        | Treatment planning |
| [974] | DL | 2021 | Personalized brachytherapy dose reconstruction using deep learning                                                                                                                 | Treatment planning |
| [975] | DL | 2021 | Convolutional neural network and transfer learning for dose volume histogram prediction for prostate cancer radiotherapy                                                           | Treatment planning |
| [976] | DL | 2021 | Deep dose plugin: Towards real-Time Monte Carlo dose calculation through a deep learning-based denoising algorithm                                                                 | Treatment planning |
| [977] | DL | 2021 | Improving efficiency of training a virtual treatment planner network via knowledge-guided deep reinforcement learning for intelligent automatic treatment planning of radiotherapy | Treatment planning |
| [978] | DL | 2021 | Introducing matrix sparsity with kernel truncation into dose calculations for fluence optimization                                                                                 | Treatment planning |
| [979] | DL | 2021 | Clinical implementation of automated treatment planning for whole-brain radiotherapy                                                                                               | Treatment planning |
| [980] | DL | 2021 | Development and dosimetric assessment of an automatic dental artifact classification tool to guide artifact management techniques in a fully automated treatment planning workflow | Treatment planning |
| [981] | DL | 2021 | Predicting Three-Dimensional Dose Distribution of Prostate Volumetric Modulated Arc Therapy Using Deep Learning                                                                    | Treatment planning |
| [982] | DL | 2021 | An artificial intelligence-driven agent for real-time head-and-neck IMRT plan generation using conditional generative adversarial network (cGAN)                                   | Treatment planning |
| [983] | DL | 2021 | Prospective Clinical Feasibility Study for MRI-Only Brain Radiotherapy                                                                                                             | Treatment planning |
| [984] | DL | 2021 | High-Particle Simulation of Monte-Carlo Dose Distribution with 3D ConvLSTMs                                                                                                        | Treatment planning |
| [985] | DL | 2021 | DeepMC: a deep learning method for efficient Monte Carlo beamlet dose calculation by predictive denoising in magnetic resonance-guided radiotherapy                                | Treatment planning |
| [986] | DL | 2021 | Artificial intelligence based treatment planning of radiotherapy for locally advanced breast cancer                                                                                | Treatment planning |
| [987] | DL | 2021 | Feasibility of automated planning for whole-brain radiation therapy using deep learning                                                                                            | Treatment planning |
| [988] | ML | 2021 | Prediction of multi-criteria optimization (MCO) parameter efficiency in volumetric modulated arc therapy (VMAT) treatment planning using machine learning (ML)                     | Treatment planning |
| [989] | ML | 2021 | A multivariate approach to determine electron beam parameters for a Monte Carlo 6 MV Linac model: Statistical and machine learning methods                                         | Treatment planning |
| [990] | ML | 2021 | Conditional gradient methods for convex optimization with general affine and nonlinear constraints                                                                                 | Treatment planning |
| [991] | ML | 2021 | Clinical integration of machine learning for curative-intent radiation treatment of patients with prostate cancer                                                                  | Treatment planning |
| [992] | ML | 2021 | Outcome-based multiobjective optimization of lymphoma radiation therapy plans                                                                                                      | Treatment planning |
| [993] | ML | 2021 | The feasibility of a dose painting procedure to treat prostate cancer based on mpMR images and hierarchical clustering                                                             | Treatment planning |

|       |    |      |                                                                                                                             |                    |
|-------|----|------|-----------------------------------------------------------------------------------------------------------------------------|--------------------|
| [994] | ML | 2021 | A data-driven approach to optimal beam/arc angle selection for liver stereotactic body radiation therapy treatment planning | Treatment planning |
| [995] | ML | 2021 | Clinical Experience With Machine Learning-Based Automated Treatment Planning for Whole Breast Radiation Therapy             | Treatment Planning |

## References

10. Field, M.; Vinod, S.; Aherne, N.; Carolan, M.; Dekker, A.; Delaney, G.; Greenham, S.; Hau, E.; Lehmann, J.; Ludbrook, J.; et al. Implementation of the Australian Computer-Assisted Theragnostics (AusCAT) network for radiation oncology data extraction, reporting and distributed learning. *J Med Imaging Radiat Oncol* **2021**, *65*, 627–636, doi:10.1111/1754-9485.13287.
12. Haskins, G.; Kruecker, J.; Kruger, U.; Xu, S.; Pinto, P.A.; Wood, B.J.; Yan, P. Learning deep similarity metric for 3D MR-TRUS image registration. *Int J Comput Assist Radiol Surg* **2019**, *14*, 417–425, doi:10.1007/s11548-018-1875-7.
13. Cao, X.; Yang, J.; Wang, L.; Xue, Z.; Wang, Q.; Shen, D. Deep Learning based Inter-Modality Image Registration Supervised by Intra-Modality Similarity. *Mach Learn Med Imaging* **2018**, *11046*, 55–63, doi:10.1007/978-3-030-00919-9\_7.
16. Weppeler, S.; Schinkel, C.; Kirkby, C.; Smith, W. Lasso logistic regression to derive workflow-specific algorithm performance requirements as demonstrated for head and neck cancer deformable image registration in adaptive radiation therapy. *Phys Med Biol* **2020**, *65*, 195013, doi:10.1088/1361-6560/ab9fc8.
18. Liang, X.; Bibault, J.E.; Leroy, T.; Escande, A.; Zhao, W.; Chen, Y.; Buyyounouski, M.K.; Hancock, S.L.; Bagshaw, H.; Xing, L. Automated contour propagation of the prostate from pCT to CBCT images via deep unsupervised learning. *Med Phys* **2021**, *48*, 1764–1770, doi:10.1002/mp.14755.
23. Rosen, B.S.; Hawkins, P.G.; Polan, D.F.; Balter, J.M.; Brock, K.K.; Kamp, J.D.; Lockhart, C.M.; Eisbruch, A.; Mierzwa, M.L.; Ten Haken, R.K.; et al. Early Changes in Serial CBCT-Measured Parotid Gland Biomarkers Predict Chronic Xerostomia After Head and Neck Radiation Therapy. *Int J Radiat Oncol Biol Phys* **2018**, *102*, 1319–1329, doi:10.1016/j.ijrobp.2018.06.048.
24. Li, X.; Chen, H.; Qi, X.; Dou, Q.; Fu, C.W.; Heng, P.A. H-DenseUNet: Hybrid Densely Connected UNet for Liver and Tumor Segmentation From CT Volumes. *IEEE Trans Med Imaging* **2018**, *37*, 2663–2674, doi:10.1109/tmi.2018.2845918.
25. Chen, L.; Bentley, P.; Mori, K.; Misawa, K.; Fujiwara, M.; Rueckert, D. DRINet for Medical Image Segmentation. *IEEE Trans Med Imaging* **2018**, *37*, 2453–2462, doi:10.1109/tmi.2018.2835303.
26. Tong, N.; Gou, S.; Yang, S.; Ruan, D.; Sheng, K. Fully automatic multi-organ segmentation for head and neck cancer radiotherapy using shape representation model constrained fully convolutional neural networks. *Med Phys* **2018**, *45*, 4558–4567, doi:10.1002/mp.13147.
27. Tong, N.; Gou, S.; Yang, S.; Cao, M.; Sheng, K. Shape constrained fully convolutional DenseNet with adversarial training for multiorgan segmentation on head and neck CT and low-field MR images. *Med Phys* **2019**, *46*, 2669–2682, doi:10.1002/mp.13553.
29. Sibolt, P.; Andersson, L.M.; Calmels, L.; Sjostrom, D.; Bjelkengren, U.; Geertsen, P.; Behrens, C.F. Clinical implementation of artificial intelligence-driven cone-beam computed tomography-guided online adaptive radiotherapy in the pelvic region. *Phys Imaging Radiat Oncol* **2021**, *17*, 1–7, doi:10.1016/j.phro.2020.12.004.
30. Feng, C.H.; Cornell, M.; Moore, K.L.; Karunamuni, R.; Seibert, T.M. Automated contouring and planning pipeline for hippocampal-avoidant whole-brain radiotherapy. *Radiat Oncol* **2020**, *15*, 251, doi:10.1186/s13014-020-01689-y.

31. Pan, K.; Zhao, L.; Gu, S.; Tang, Y.; Wang, J.; Yu, W.; Zhu, L.; Feng, Q.; Su, R.; Xu, Z.; et al. Deep learning-based automatic delineation of the hippocampus by MRI: geometric and dosimetric evaluation. *Radiat Oncol* **2021**, *16*, 12, doi:10.1186/s13014-020-01724-y.
32. Liu, Y.; Lei, Y.; Fu, Y.; Wang, T.; Zhou, J.; Jiang, X.; McDonald, M.; Beitler, J.J.; Curran, W.J.; Liu, T.; et al. Head and neck multi-organ auto-segmentation on CT images aided by synthetic MRI.
33. Zhong, Y.; Yang, Y.; Fang, Y.; Wang, J.; Hu, W. A Preliminary Experience of Implementing Deep-Learning Based Auto-Segmentation in Head and Neck Cancer: A Study on Real-World Clinical Cases.
37. van Rooij, W.; Dahele, M.; Nijhuis, H.; Slotman, B.J.; Verbakel, W.F. Strategies to improve deep learning-based salivary gland segmentation. *Radiat Oncol* **2020**, *15*, 272, doi:10.1186/s13014-020-01721-1.
38. Nikolov, S.; Blackwell, S.; Zverovitch, A.; Mendes, R.; Livne, M.; De Fauw, J.; Patel, Y.; Meyer, C.; Askham, H.; Romera-Paredes, B.; et al. Clinically Applicable Segmentation of Head and Neck Anatomy for Radiotherapy: Deep Learning Algorithm Development and Validation Study. *J Med Internet Res* **2021**, *23*, e26151, doi:10.2196/26151.
42. Men, K.; Geng, H.; Biswas, T.; Liao, Z.; Xiao, Y. Automated Quality Assurance of OAR Contouring for Lung Cancer Based on Segmentation With Deep Active Learning. *Front Oncol* **2020**, *10*, 986, doi:10.3389/fonc.2020.00986.
43. Gu, H.; Gan, W.; Zhang, C.; Feng, A.; Wang, H.; Huang, Y.; Chen, H.; Shao, Y.; Duan, Y.; Xu, Z. A 2D-3D hybrid convolutional neural network for lung lobe auto-segmentation on standard slice thickness computed tomography of patients receiving radiotherapy. *Biomed Eng Online* **2021**, *20*, 94, doi:10.1186/s12938-021-00932-1.
45. Schreier, J.; Attanasi, F.; Laaksonen, H. Generalization vs. Specificity: In Which Cases Should a Clinic Train its Own Segmentation Models? *Front Oncol* **2020**, *10*, 675, doi:10.3389/fonc.2020.00675.
46. Liu, Z.; Liu, F.; Chen, W.; Liu, X.; Hou, X.; Shen, J.; Guan, H.; Zhen, H.; Wang, S.; Chen, Q.; et al. Automatic Segmentation of Clinical Target Volumes for Post-Modified Radical Mastectomy Radiotherapy Using Convolutional Neural Networks. *Front Oncol* **2020**, *10*, 581347, doi:10.3389/fonc.2020.581347.
48. Liang, F.; Qian, P.; Su, K.H.; Baydoun, A.; Leisser, A.; Van Hedent, S.; Kuo, J.W.; Zhao, K.; Parikh, P.; Lu, Y.; et al. Abdominal, multi-organ, auto-contouring method for online adaptive magnetic resonance guided radiotherapy: An intelligent, multi-level fusion approach. *Artif Intell Med* **2018**, *90*, 34-41, doi:10.1016/j.artmed.2018.07.001.
49. Xia, X.; Wang, J.; Li, Y.; Peng, J.; Fan, J.; Zhang, J.; Wan, J.; Fang, Y.; Zhang, Z.; Hu, W. An Artificial Intelligence-Based Full-Process Solution for Radiotherapy: A Proof of Concept Study on Rectal Cancer. *Front Oncol* **2020**, *10*, 616721, doi:10.3389/fonc.2020.616721.
51. Sartor, H.; Minarik, D.; Enqvist, O.; Ulén, J.; Wittrup, A.; Bjurberg, M.; Trägårdh, E. Auto-segmentations by convolutional neural network in cervical and anorectal cancer with clinical structure sets as the ground truth. *Clin Transl Radiat Oncol* **2020**, *25*, 37-45, doi:10.1016/j.ctro.2020.09.004.
52. Cha, E.; Elguindi, S.; Onochie, I.; Gorovets, D.; Deasy, J.O.; Zelefsky, M.; Gillespie, E.F. Clinical implementation of deep learning contour autosegmentation for prostate radiotherapy. *Radiother Oncol* **2021**, *159*, 1-7, doi:10.1016/j.radonc.2021.02.040.
53. Ma, C.Y.; Zhou, J.Y.; Xu, X.T.; Guo, J.; Han, M.F.; Gao, Y.Z.; Du, H.; Stahl, J.N.; Maltz, J.S. Deep learning-based auto-segmentation of clinical target volumes for radiotherapy treatment of cervical cancer. *J Appl Clin Med Phys* **2021**, doi:10.1002/acm2.13470.
54. Byrne, M.; Archibald-Heeren, B.; Hu, Y.; Teh, A.; Beserminji, R.; Cai, E.; Liu, G.; Yates, A.; Rijken, J.; Collett, N.; et al. Varian ethos online adaptive radiotherapy for prostate cancer: Early results of contouring accuracy, treatment plan quality, and treatment time. *J Appl Clin Med Phys* **2022**, *23*, e13479, doi:10.1002/acm2.13479.
70. Maffei, N.; Manco, L.; Aluisio, G.; D'Angelo, E.; Ferrazza, P.; Vanoni, V.; Meduri, B.; Lohr, F.; Guidi, G. Radiomics classifier to quantify automatic segmentation quality of cardiac sub-structures for radiotherapy treatment planning. *Phys Med* **2021**, *83*, 278-286, doi:10.1016/j.ejmp.2021.05.009.
71. van Rooij, W.; Verbakel, W.F.; Slotman, B.J.; Dahele, M. Using Spatial Probability Maps to Highlight Potential Inaccuracies in Deep Learning-Based Contours: Facilitating Online Adaptive Radiation Therapy. *Advances in Radiation Oncology* **2021**, *6*, doi:10.1016/j.adro.2021.100658.
72. Nijhuis, H.; van Rooij, W.; Gregoire, V.; Overgaard, J.; Slotman, B.J.; Verbakel, W.F.; Dahele, M. Investigating the potential of deep learning for patient-specific quality assurance of salivary gland contours using EORTC-1219-DAHANCA-29 clinical trial data. *Acta Oncologica* **2021**, *60*, 575-581, doi:10.1080/0284186X.2020.1863463.
73. Maspero, M.; Savenije, M.H.F.; Dinkla, A.M.; Seevinck, P.R.; Intven, M.P.W.; Jurgenliemk-Schulz, I.M.; Kerkmeijer, L.G.W.; van den Berg, C.A.T. Dose evaluation of fast synthetic-CT generation using a generative adversarial network for general pelvis MR-only radiotherapy. *Phys Med Biol* **2018**, *63*, 185001, doi:10.1088/1361-6560/aada6d.

74. Barateau, A.; De Crevoisier, R.; Largent, A.; Mylona, E.; Perichon, N.; Castelli, J.; Chajon, E.; Acosta, O.; Simon, A.; Nunes, J.C.; et al. Comparison of CBCT-based dose calculation methods in head and neck cancer radiotherapy: from Hounsfield unit to density calibration curve to deep learning. *Medical Physics* **2020**, *47*, 4683–4693, doi:10.1002/mp.14387.
78. Han, X. MR-based synthetic CT generation using a deep convolutional neural network method. *Med Phys* **2017**, *44*, 1408–1419, doi:10.1002/mp.12155.
79. Li, Y.; Zhu, J.; Liu, Z.; Teng, J.; Xie, Q.; Zhang, L.; Liu, X.; Shi, J.; Chen, L. A preliminary study of using a deep convolution neural network to generate synthesized CT images based on CBCT for adaptive radiotherapy of nasopharyngeal carcinoma. *Phys Med Biol* **2019**, *64*, 145010, doi:10.1088/1361-6560/ab2770.
80. Dhont, J.; Verellen, D.; Mollaert, I.; Vanreusel, V.; Vandemeulebroucke, J. RealDRR - Rendering of realistic digitally reconstructed radiographs using locally trained image-to-image translation. *Radiother Oncol* **2020**, *153*, 213–219, doi:10.1016/j.radonc.2020.10.004.
81. Bahrami, A.; Karimian, A.; Fatemizadeh, E.; Arabi, H.; Zaidi, H. A new deep convolutional neural network design with efficient learning capability: Application to CT image synthesis from MRI. *Med Phys* **2020**, *47*, 5158–5171, doi:10.1002/mp.14418.
82. Maspero, M.; Bentvelzen, L.G.; Savenije, M.H.F.; Guerreiro, F.; Seravalli, E.; Janssens, G.O.; van den Berg, C.A.T.; Philippens, M.E.P. Deep learning-based synthetic CT generation for paediatric brain MR-only photon and proton radiotherapy. *Radiother Oncol* **2020**, *153*, 197–204, doi:10.1016/j.radonc.2020.09.029.
83. Dai, X.; Lei, Y.; Tian, Z.; Wang, T.; Liu, T.; Curran, W.J.; Yang, X. Deep learning-based volumetric image generation from projection imaging for prostate radiotherapy. 2021.
84. Tong, F.; Nakao, M.; Wu, S.; Nakamura, M.; Matsuda, T. X-ray2Shape: Reconstruction of 3D Liver Shape from a Single 2D Projection Image. 2020; pp. 1608–1611.
85. Cusumano, D.; Lenkowicz, J.; Votta, C.; Boldrini, L.; Placidi, L.; Catucci, F.; Dinapoli, N.; Antonelli, M.V.; Romano, A.; De Luca, V.; et al. A deep learning approach to generate synthetic CT in low field MR-guided adaptive radiotherapy for abdominal and pelvic cases. *Radiother Oncol* **2020**, *153*, 205–212, doi:10.1016/j.radonc.2020.10.018.
87. Cilla, S.; Deodato, F.; Romano, C.; Ianiro, A.; Macchia, G.; Re, A.; Buwenge, M.; Boldrini, L.; Indovina, L.; Valentini, V.; et al. Personalized automation of treatment planning in head-neck cancer: A step forward for quality in radiation therapy? *Phys Med* **2021**, *82*, 7–16, doi:10.1016/j.ejmp.2020.12.015.
88. Hrinivich, W.T.; Lee, J. Artificial intelligence-based radiotherapy machine parameter optimization using reinforcement learning. *Med Phys* **2020**, *47*, 6140–6150, doi:10.1002/mp.14544.
90. Cilla, S.; Macchia, G.; Romano, C.; Morabito, V.E.; Boccardi, M.; Picardi, V.; Valentini, V.; Morganti, A.G.; Deodato, F. Challenges in lung and heart avoidance for postmastectomy breast cancer radiotherapy: Is automated planning the answer? *Med Dosim* **2021**, *46*, 295–303, doi:10.1016/j.meddos.2021.03.002.
91. Kida, S.; Nakamoto, T.; Nakano, M.; Nawa, K.; Haga, A.; Kotoku, J.; Yamashita, H.; Nakagawa, K. Cone Beam Computed Tomography Image Quality Improvement Using a Deep Convolutional Neural Network. *Cureus* **2018**, *10*, e2548, doi:10.7759/cureus.2548.
92. Kurosawa, T.; Nishio, T.; Moriya, S.; Tsuneda, M.; Karasawa, K. Feasibility of image quality improvement for high-speed CBCT imaging using deep convolutional neural network for image-guided radiotherapy in prostate cancer. *Phys Med* **2020**, *80*, 84–91, doi:10.1016/j.ejmp.2020.10.012.
93. Rostampour, N.; Jabbari, K.; Esmaeili, M.; Mohammadi, M.; Nabavi, S. Markerless Respiratory Tumor Motion Prediction Using an Adaptive Neuro-fuzzy Approach. *J Med Signals Sens* **2018**, *8*, 25–30.
94. Gustafsson, C.J.; Sward, J.; Adalbjornsson, S.I.; Jakobsson, A.; Olsson, L.E. Development and evaluation of a deep learning based artificial intelligence for automatic identification of gold fiducial markers in an MRI-only prostate radiotherapy workflow. *Phys Med Biol* **2020**, *65*, 225011, doi:10.1088/1361-6560/abb0f9.
95. Takahashi, W.; Oshikawa, S.; Mori, S. Real-time markerless tumour tracking with patient-specific deep learning using a personalised data generation strategy: Proof of concept by phantom study. *British Journal of Radiology* **2020**, *93*, doi:10.1259/bjr.20190420.
101. Xu, H.; Zhang, B.; Guerrero, M.; Lee, S.W.; Lamichhane, N.; Chen, S.; Yi, B. Toward automation of initial chart check for photon/electron EBRT: the clinical implementation of new AAPM task group reports and automation techniques. *J Appl Clin Med Phys* **2021**, *22*, 234–245, doi:10.1002/acm2.13200.
103. Cho, Y.B.; Farrokhkish, M.; Norrlinger, B.; Heaton, R.; Jaffray, D.; Islam, M. An artificial neural network to model response of a radiotherapy beam monitoring system. *Med Phys* **2020**, *47*, 1983–1994, doi:10.1002/mp.14033.
104. Luk, S.M.H.; Meyer, J.; Young, L.A.; Cao, N.; Ford, E.C.; Phillips, M.H.; Kalet, A.M. Characterization of a Bayesian network-based radiotherapy plan verification model. *Med Phys* **2019**, *46*, 2006–2014, doi:10.1002/mp.13515.

105. Huang, Z.; Hu, C.; Chi, C.; Jiang, Z.; Tong, Y.; Zhao, C. An Artificial Intelligence Model for Predicting 1-Year Survival of Bone Metastases in Non-Small-Cell Lung Cancer Patients Based on XGBoost Algorithm. *Biomed Res Int* **2020**, *2020*, 3462363, doi:10.1155/2020/3462363.
106. Du, R.; Lee, V.H.; Yuan, H.; Lam, K.O.; Pang, H.H.; Chen, Y.; Lam, E.Y.; Khong, P.L.; Lee, A.W.; Kwong, D.L.; et al. Radiomics Model to Predict Early Progression of Nonmetastatic Nasopharyngeal Carcinoma after Intensity Modulation Radiation Therapy: A Multicenter Study. *Radiol Artif Intell* **2019**, *1*, e180075, doi:10.1148/ryai.2019180075.
110. van Velzen, S.G.M.; Gal, R.; Teske, A.J.; van der Leij, F.; van den Bongard, D.; Viergever, M.A.; Verkooijen, H.M.; Išgum, I. AI-Based Radiation Dose Quantification for Estimation of Heart Disease Risk in Breast Cancer Survivors After Radiation Therapy. *Int J Radiat Oncol Biol Phys* **2021**, doi:10.1016/j.ijrobp.2021.09.008.
111. Tabl, A.A.; Alkhateeb, A.; ElMaraghy, W.; Rueda, L.; Ngom, A. A machine learning approach for identifying gene biomarkers guiding the treatment of breast cancer. *Frontiers in Genetics* **2019**, *10*, doi:10.3389/fgene.2019.00256.
112. Ubaldi, L.; Valenti, V.; Borgese, R.F.; Collura, G.; Fantacci, M.E.; Ferrera, G.; Iacoviello, G.; Abbate, B.F.; Laruina, F.; Tripoli, A.; et al. Strategies to develop radiomics and machine learning models for lung cancer stage and histology prediction using small data samples. *Physica Medica* **2021**, *90*, 13–22, doi:10.1016/j.ejmp.2021.08.015.
113. Kawahara, D.; Murakami, Y.; Tani, S.; Nagata, Y. A prediction model for degree of differentiation for resectable locally advanced esophageal squamous cell carcinoma based on CT images using radiomics and machine-learning. *British Journal of Radiology* **2021**, *94*, doi:10.1259/bjr.20210525.
115. Wu, S.; Jiao, Y.; Zhang, Y.; Ren, X.; Li, P.; Yu, Q.; Zhang, Q.; Wang, Q.; Fu, S. Imaging-Based Individualized Response Prediction Of Carbon Ion Radiotherapy For Prostate Cancer Patients. *Cancer Manag Res* **2019**, *11*, 9121–9131, doi:10.2147/cmar.S214020.
116. Haak, H.E.; Gao, X.; Maas, M.; Waktola, S.; Benson, S.; Beets-Tan, R.G.H.; Beets, G.L.; van Leerdam, M.; Melenhorst, J. The use of deep learning on endoscopic images to assess the response of rectal cancer after chemoradiation. *Surg Endosc* **2021**, doi:10.1007/s00464-021-08685-7.
117. Osman, S.O.S.; Leijenaar, R.T.H.; Cole, A.J.; Lyons, C.A.; Hounsell, A.R.; Prise, K.M.; O'Sullivan, J.M.; Lambin, P.; McGarry, C.K.; Jain, S. Computed Tomography-based Radiomics for Risk Stratification in Prostate Cancer. *International Journal of Radiation Oncology Biology Physics* **2019**, *105*, 448–456, doi:10.1016/j.ijrobp.2019.06.2504.
118. Yang, Z.; Olszewski, D.; He, C.; Pinteá, G.; Lian, J.; Chou, T.; Chen, R.C.; Shtylla, B. Machine learning and statistical prediction of patient quality-of-life after prostate radiation therapy. *Computers in Biology and Medicine* **2021**, *129*, doi:10.1016/j.compbimed.2020.104127.
119. Jochems, A.; El-Naqa, I.; Kessler, M.; Mayo, C.S.; Jolly, S.; Matuszak, M.; Faivre-Finn, C.; Price, G.; Holloway, L.; Vinod, S.; et al. A prediction model for early death in non-small cell lung cancer patients following curative-intent chemoradiotherapy. *Acta Oncologica* **2018**, *57*, 226–230, doi:10.1080/0284186X.2017.1385842.
120. Blackledge, M.D.; Winfield, J.M.; Miah, A.; Strauss, D.; Thway, K.; Morgan, V.A.; Collins, D.J.; Koh, D.M.; Leach, M.O.; Messiou, C. Supervised Machine-Learning Enables Segmentation and Evaluation of Heterogeneous Post-treatment Changes in Multi-Parametric MRI of Soft-Tissue Sarcoma. *Front Oncol* **2019**, *9*, 941, doi:10.3389/fonc.2019.00941.
121. Stenhouse, K.; Roumeliotis, M.; Ciunkiewicz, P.; Banerjee, R.; Yanushkevich, S.; McGeachy, P. Development of a Machine Learning Model for Optimal Applicator Selection in High-Dose-Rate Cervical Brachytherapy. *Front Oncol* **2021**, *11*, 611437, doi:10.3389/fonc.2021.611437.
122. Li, H.; Galperin-Aizenberg, M.; Pryma, D.; Simone, C.B., II; Fan, Y. Unsupervised machine learning of radiomic features for predicting treatment response and overall survival of early stage non-small cell lung cancer patients treated with stereotactic body radiation therapy. *Radiotherapy and Oncology* **2018**, *129*, 218–226, doi:10.1016/j.radonc.2018.06.025.
140. Dinkla, A.M.; Wolterink, J.M.; Maspero, M.; Savenije, M.H.F.; Verhoeff, J.J.C.; Seravalli, E.; Išgum, I.; Seevinck, P.R.; van den Berg, C.A.T. MR-Only Brain Radiation Therapy: Dosimetric Evaluation of Synthetic CTs Generated by a Dilated Convolutional Neural Network. *Int J Radiat Oncol Biol Phys* **2018**, *102*, 801–812, doi:10.1016/j.ijrobp.2018.05.058.
141. Chun, J.; Zhang, H.; Gach, H.M.; Olberg, S.; Mazur, T.; Green, O.; Kim, T.; Kim, H.; Kim, J.S.; Mutic, S.; et al. MRI super-resolution reconstruction for MRI-guided adaptive radiotherapy using cascaded deep learning: In the presence of limited training data and unknown translation model. *Medical Physics* **2019**, *46*, 4148–4164, doi:10.1002/mp.13717.
142. Wang, C.; Rimmer, A.; Hu, Y.C.; Tyagi, N.; Jiang, J.; Yorke, E.; Riyahi, S.; Mageras, G.; Deasy, J.O.; Zhang, P. Toward predicting the evolution of lung tumors during radiotherapy observed on a longitudinal MR imaging study via a deep learning algorithm. *Medical Physics* **2019**, *46*, 4699–4707, doi:10.1002/mp.13765.

143. Wang, C.; Tyagi, N.; Rimner, A.; Hu, Y.C.; Veeraraghavan, H.; Li, G.; Hunt, M.; Mageras, G.; Zhang, P. Segmenting lung tumors on longitudinal imaging studies via a patient-specific adaptive convolutional neural network. *Radiotherapy and Oncology* **2019**, *131*, 101–107, doi:10.1016/j.radonc.2018.10.037.
144. Lei, Y.; Tang, X.; Higgins, K.; Lin, J.; Jeong, J.; Liu, T.; Dhabaan, A.; Wang, T.; Dong, X.; Press, R.; et al. Learning-based CBCT correction using alternating random forest based on auto-context model. *Medical Physics* **2019**, *46*, 601–618, doi:10.1002/mp.13295.
145. Daoud, B.I.; Morooka, K., II; Miyauchi, S., III; Kurazume, R.I.; Mnejja, W.V.; Farhat, L.V.; Daoud, J.V. A deep learning-based method for predicting volumes of nasopharyngeal carcinoma for adaptive radiation therapy treatment. 2020; pp. 3256–3263.
146. Duan, L.; Ni, X.; Liu, Q.; Gong, L.; Yuan, G.; Li, M.; Yang, X.; Fu, T.; Zheng, J. Unsupervised learning for deformable registration of thoracic CT and cone-beam CT based on multiscale features matching with spatially adaptive weighting. *Medical Physics* **2020**, *47*, 5632–5647, doi:10.1002/mp.14464.
147. Elmahdy, M.S.; Ahuja, T.; Van Der Heide, U.A.; Staring, M. Patient-Specific Finetuning of Deep Learning Models for Adaptive Radiotherapy in Prostate CT. 2020; pp. 577–580.
148. Kuckertz, S.; Papenberg, N.; Honegger, J.; Morgas, T.; Haas, B.; Heldmann, S. Learning deformable image registration with structure guidance constraints for adaptive radiotherapy. **2020**, *12120 LNCS*, 44–53, doi:10.1007/978-3-030-50120-4\_5.
149. Lee, D.; Alam, S.; Nadeem, S.; Jiang, J.; Zhang, P.; Hu, Y.C. Longitudinal Prediction of Radiation-Induced Anatomical Changes of Parotid Glands During Radiotherapy Using Deep Learning. **2020**, *12329 LNCS*, 123–132, doi:10.1007/978-3-030-59354-4\_12.
150. Park, S.; Ye, J.C. Unsupervised Cone-Beam Artifact Removal Using CycleGAN and Spectral Blending for Adaptive Radiotherapy. 2020; pp. 638–641.
151. Kajikawa, T.; Kadoya, N.; Tanaka, S.; Nemoto, H.; Takahashi, N.; Chiba, T.; Ito, K.; Katsuta, Y.; Dobashi, S.; Takeda, K.; et al. Dose distribution correction for the influence of magnetic field using a deep convolutional neural network for online MR-guided adaptive radiotherapy. *Phys Med* **2020**, *80*, 186–192, doi:10.1016/j.ejmp.2020.11.002.
152. Taasti, V.T.; Klages, P.; Parodi, K.; Muren, L.P. Developments in deep learning based corrections of cone beam computed tomography to enable dose calculations for adaptive radiotherapy. *Physics and Imaging in Radiation Oncology* **2020**, *15*, 77–79, doi:10.1016/j.phro.2020.07.012.
153. Lim, S.N.; Ahunbay, E.E.; Nasief, H.; Zheng, C.; Lawton, C.; Li, X.A. Indications of Online Adaptive Replanning Based On Organ Deformation. *Practical Radiation Oncology* **2020**, *10*, e95–e102, doi:10.1016/j.prro.2019.08.007.
154. Osman, A.F.I.; Maalej, N.M.; Jayesh, K. Prediction of the individual multileaf collimator positional deviations during dynamic IMRT delivery priori with artificial neural network. *Medical Physics* **2020**, *47*, 1421–1430, doi:10.1002/mp.14014.
155. Santhanam, A.P.; Lauria, M.; Stiehl, B.; Elliott, D.; Seshan, S.; Hsieh, S.; Cao, M.; Low, D. An adversarial machine learning based approach and biomechanically-guided validation for improving deformable image registration accuracy between a planning CT and cone-beam CT for adaptive prostate radiotherapy applications. 2020.
156. Wang, C.; R Alam, S.; Zhang, S.; Hu, Y.C.; Nadeem, S.; Tyagi, N.; Rimner, A.; Lu, W.; Thor, M.; Zhang, P. Predicting spatial esophageal changes in a multimodal longitudinal imaging study via a convolutional recurrent neural network. *Physics in Medicine and Biology* **2020**, *65*, doi:10.1088/1361-6560/abb1d9.
157. Chen, W.; Li, Y.; Yuan, N.; Qi, J.; Dyer, B.A.; Sensoy, L.; Benedict, S.H.; Shang, L.; Rao, S.; Rong, Y. Clinical Enhancement in AI-Based Post-processed Fast-Scan Low-Dose CBCT for Head and Neck Adaptive Radiotherapy. *Frontiers in Artificial Intelligence* **2021**, *3*, doi:10.3389/frai.2020.614384.
158. Chun, J.; Park, J.C.; Olberg, S.; Zhang, Y.; Nguyen, D.; Wang, J.; Kim, J.S.; Jiang, S. Intentional deep overfit learning (IDOL): A novel deep learning strategy for adaptive radiation therapy. *Med Phys* **2022**, *49*, 488–496, doi:10.1002/mp.15352.
159. Künzel, L.A.; Nachbar, M.; Hagmüller, M.; Gani, C.; Boeke, S.; Zips, D.; Thorwarth, D. First experience of autonomous, un-supervised treatment planning integrated in adaptive MR-guided radiotherapy and delivered to a patient with prostate cancer. *Radiother Oncol* **2021**, *159*, 197–201, doi:10.1016/j.radonc.2021.03.032.
160. Lee, D.; Jeong, S.W.; Kim, S.J.; Cho, H.; Park, W.; Han, Y. Improvement of megavoltage computed tomography image quality for adaptive helical tomotherapy using cycleGAN-based image synthesis with small datasets. *Medical Physics* **2021**, *48*, 5593–5610, doi:10.1002/mp.15182.
161. Li, R.; Roy, A.; Bice, N.; Kirby, N.; Fakhreddine, M.; Papanikolaou, N. Managing tumor changes during radiotherapy using a deep learning model. *Medical Physics* **2021**, *48*, 5152–5164, doi:10.1002/mp.14925.

162. Pakela, J.M.; Matuszak, M.M.; Ten Haken, R.K.; McShan, D.L.; El Naqa, I. Dynamic stochastic deep learning approaches for predicting geometric changes in head and neck cancer. *Physics in Medicine and Biology* **2021**, *66*, doi:10.1088/1361-6560/ac2b80.
163. Xie, H.; Lei, Y.; Wang, T.; Fu, Y.; Tang, X.; Curran, W.J.; Patel, P.; Liu, T.; Yang, X. Deep learning-based deformable image registration of inter-fraction CBCT images for adaptive radiation therapy. 2021.
164. Gernaat, S.A.M.; van Velzen, S.G.M.; Koh, V.; Emaus, M.J.; Išgum, I.; Lessmann, N.; Moes, S.; Jacobson, A.; Tan, P.W.; Grobbee, D.E.; et al. Automatic quantification of calcifications in the coronary arteries and thoracic aorta on radiotherapy planning CT scans of Western and Asian breast cancer patients. *Radiotherapy and Oncology* **2018**, *127*, 487-492, doi:10.1016/j.radonc.2018.04.011.
165. McGarry, S.D.; Hurrell, S.L.; Iczkowski, K.A.; Hall, W.; Kaczmarowski, A.L.; Banerjee, A.; Keuter, T.; Jacobsohn, K.; Bukowy, J.D.; Nevalainen, M.T.; et al. Radio-pathomic Maps of Epithelium and Lumen Density Predict the Location of High-Grade Prostate Cancer. *International Journal of Radiation Oncology Biology Physics* **2018**, *101*, 1179-1187, doi:10.1016/j.ijrobp.2018.04.044.
166. Miura, H.; Ozawa, S.; Enosaki, T.; Hayata, M.; Yamada, K.; Nagata, Y. Gantry angle classification with a fluence map in intensity-modulated radiotherapy for prostate cases using machine learning. *Polish Journal of Medical Physics and Engineering* **2018**, *24*, 165-169, doi:10.2478/pjmpe-2018-0023.
167. Morrison, M.A.; Payabvash, S.; Chen, Y.; Avadiappan, S.; Shah, M.; Zou, X.; Hess, C.P.; Lupo, J.M. A user-guided tool for semi-automated cerebral microbleed detection and volume segmentation: Evaluating vascular injury and data labelling for machine learning. *NeuroImage: Clinical* **2018**, *20*, 498-505, doi:10.1016/j.nicl.2018.08.002.
168. Ninomiya, K.; Arimura, H.; Sasahara, M.; Kai, Y.; Hirose, T.A.; Ohga, S. Feasibility of anatomical feature points for the estimation of prostate locations in the Bayesian delineation frameworks for prostate cancer radiotherapy. *Radiological Physics and Technology* **2018**, *11*, 434-444, doi:10.1007/s12194-018-0481-2.
169. Peng, L.; Parekh, V.; Huang, P.; Lin, D.D.; Sheikh, K.; Baker, B.; Kirschbaum, T.; Silvestri, F.; Son, J.; Robinson, A.; et al. Distinguishing True Progression From Radionecrosis After Stereotactic Radiation Therapy for Brain Metastases With Machine Learning and Radiomics. *International Journal of Radiation Oncology Biology Physics* **2018**, *102*, 1236-1243, doi:10.1016/j.ijrobp.2018.05.041.
170. Joshua Jeyasekar, D.; Arulselvi, G.; Vedanarayanan, V.; Poornima, D. Bone cancer identification and classification using hybrid fuzzy clustering with deep learning classification. *Journal of Advanced Research in Dynamical and Control Systems* **2019**, *11*, 88-98, doi:10.5373/JARDCS/V11SP10/20192779.
171. Brooks, G.A.; Bergquist, S.L.; Landrum, M.B.; Rose, S.; Keating, N.L. Classifying stage IV lung cancer from health care claims: A comparison of multiple analytic approaches. *JCO Clinical Cancer Informatics* **2019**, *3*, 1-19, doi:10.1200/CCI.18.00156.
172. Lei, Y.; Liu, Y.; Wang, T.; Tian, S.; Dong, X.; Jiang, X.; Liu, T.; Mao, H.; Curran, W.J.; Shu, H.K.; et al. Brain MRI classification based on machine learning framework with auto-context model. 2019.
173. Leng, X.; Fang, P.; Lin, H.; Qin, C.; Tan, X.; Liang, Y.; Zhang, C.; Wang, H.; An, J.; Wu, D.; et al. Application of a machine learning method to whole brain white matter injury after radiotherapy for nasopharyngeal carcinoma. *Cancer Imaging* **2019**, *19*, doi:10.1186/s40644-019-0203-y.
174. van Velzen, S.G.M.; Lessmann, N.; Velthuis, B.K.; Bank, I.E.M.; van den Bongard, D.H.J.G.; Leiner, T.; de Jong, P.A.; Veldhuis, W.B.; Correa, A.; Terry, J.G.; et al. Deep learning for automatic calcium scoring in CT: Validation using multiple cardiac CT and chest CT protocols. *Radiology* **2020**, *295*, 66-79, doi:10.1148/radiol.2020191621.
175. Cao, J.; Shi, X.; Gurav, D.D.; Huang, L.; Su, H.; Li, K.; Niu, J.; Zhang, M.; Wang, Q.; Jiang, M.; et al. Metabolic Fingerprinting on Synthetic Alloys for Medulloblastoma Diagnosis and Radiotherapy Evaluation. *Advanced Materials* **2020**, *32*, doi:10.1002/adma.202000906.
176. Comelli, A.; Stefano, A.; Bignardi, S.; Coronello, C.; Russo, G.; Sabini, M.G.; Ippolito, M.; Yezzi, A. Tissue Classification to Support Local Active Delineation of Brain Tumors. **2020**, *1065 CCIS*, 3-14, doi:10.1007/978-3-030-39343-4\_1.
177. Baltussen, E.J.M.; Brouwer de Koning, S.G.; Sanders, J.; Aalbers, A.G.J.; Kok, N.F.M.; Beets, G.L.; Hendriks, B.H.W.; Sterenborg, H.; Kuhlmann, K.F.D.; Ruers, T.J.M. Using Diffuse Reflectance Spectroscopy to Distinguish Tumor Tissue From Fibrosis in Rectal Cancer Patients as a Guide to Surgery. *Lasers Surg Med* **2020**, *52*, 604-611, doi:10.1002/lsm.23196.
178. Liu, M.; Cygler, J.E.; Vandervoort, E. Patient-specific PTV margins for liver stereotactic body radiation therapy determined using support vector classification with an early warning system for margin adaptation. *Medical Physics* **2020**, *47*, 5172-5182, doi:10.1002/mp.14419.

179. Sanduleanu, S.; Jochems, A.; Upadhyaya, T.; Even, A.J.G.; Leijenaar, R.T.H.; Dankers, F.J.W.M.; Klaassen, R.; Woodruff, H.C.; Hatt, M.; Kaanders, H.J.A.M.; et al. Non-invasive imaging prediction of tumor hypoxia: A novel developed and externally validated CT and FDG-PET-based radiomic signatures. *Radiotherapy and Oncology* **2020**, *153*, 97–105, doi:10.1016/j.radonc.2020.10.016.
180. Arrowsmith, C.; Reiazi, R.; Welch, M.L.; Kazmierski, M.; Patel, T.; Rezaie, A.; Tadic, T.; Bratman, S.; Haibe-Kains, B. Automated detection of dental artifacts for large-scale radiomic analysis in radiation oncology. *Phys Imaging Radiat Oncol* **2021**, *18*, 41–47, doi:10.1016/j.phro.2021.04.001.
181. Lin, Q.; Qi, Q.; Hou, S.; Chen, Z.; Jiang, N.; Zhang, L.; Lin, C. Application of Pet-CT Fusion Deep Learning Imaging in Precise Radiotherapy of Thyroid Cancer. *Journal of Healthcare Engineering* **2021**, 2021, doi:10.1155/2021/2456429.
182. Gaikwad, S.; Patel, S.; Shetty, A. Brain tumor detection: An application based on machine learning. 2021.
183. Kowalchuk, R.O.; Waters, M.R.; Martin Richardson, K.; Spencer, K.; Larnar, J.M.; McAllister, W.H.; Sheehan, J.P.; Kersh, C.R. Stereotactic body radiation therapy for spinal metastases: A novel local control stratification by spinal region. *Journal of Neurosurgery: Spine* **2021**, *34*, 267–276, doi:10.3171/2020.6.SPINE20861.
184. Park, Y.W.; Choi, D.; Park, J.E.; Ahn, S.S.; Kim, H.; Chang, J.H.; Kim, S.H.; Kim, H.S.; Lee, S.K. Differentiation of recurrent glioblastoma from radiation necrosis using diffusion radiomics with machine learning model development and external validation. *Scientific Reports* **2021**, *11*, doi:10.1038/s41598-021-82467-y.
185. Thammasorn, P.; Chaovalitwongse, W.A.; Hippe, D.S.; Wootton, L.S.; Ford, E.C.; Spraker, M.B.; Combs, S.E.; Peeken, J.C.; Nyflot, M.J. Nearest Neighbor-Based Strategy to Optimize Multi-View Triplet Network for Classification of Small-Sample Medical Imaging Data. *IEEE Transactions on Neural Networks and Learning Systems* **2021**, doi:10.1109/TNNLS.2021.3059635.
186. Younes, H.; Troccaz, J.; Voros, S. Machine learning and registration for automatic seed localization in 3D US images for prostate brachytherapy. *Medical Physics* **2021**, *48*, 1144–1156, doi:10.1002/mp.14628.
187. Zhu, J.; Yang, T.; Liu, R.; Xu, X.; Zhu, X. Image recognition of CT diagnosis for cholangiocarcinoma treatment based on FPGA processor and neural network. *Microprocessors and Microsystems* **2021**, *81*, doi:10.1016/j.micpro.2020.103645.
188. Kajikawa, T.; Kadoya, N.; Ito, K.; Takayama, Y.; Chiba, T.; Tomori, S.; Takeda, K.; Jingu, K. Automated prediction of dosimetric eligibility of patients with prostate cancer undergoing intensity-modulated radiation therapy using a convolutional neural network. *Radiological Physics and Technology* **2018**, *11*, 320–327, doi:10.1007/s12194-018-0472-3.
189. Zhang, J.; Wu, Q.J.; Xie, T.; Sheng, Y.; Yin, F.F.; Ge, Y. An Ensemble Approach to Knowledge-Based Intensity-Modulated Radiation Therapy Planning. *Front Oncol* **2018**, *8*, 57, doi:10.3389/fonc.2018.00057.
190. Virgolin, M.; Alderliesten, T.; Bel, A.; Witteveen, C.; Bosman, P.A.N. Symbolic regression and feature construction with GP-GOMEA applied to radiotherapy dose reconstruction of childhood cancer survivors. 2018; pp. 1395–1402.
191. Liu, Z.; Fan, J.; Li, M.; Yan, H.; Hu, Z.; Huang, P.; Tian, Y.; Miao, J.; Dai, J. A deep learning method for prediction of three-dimensional dose distribution of helical tomotherapy. *Medical Physics* **2019**, *46*, 1972–1983, doi:10.1002/mp.13490.
192. Ma, J.; Bai, T.; Nguyen, D.; Folkerts, M.; Jia, X.; Lu, W.; Zhou, L.; Jiang, S. Individualized 3D dose distribution prediction using deep learning. **2019**, *11850 LNCS*, 110–118, doi:10.1007/978-3-030-32486-5\_14.
193. Nguyen, D.; Jia, X.; Sher, D.; Lin, M.H.; Iqbal, Z.; Liu, H.; Jiang, S. 3D radiotherapy dose prediction on head and neck cancer patients with a hierarchically densely connected U-net deep learning architecture. *Physics in Medicine and Biology* **2019**, *64*, doi:10.1088/1361-6560/ab039b.
194. Willems, S.; Crijns, W.; Sterpin, E.; Haustermans, K.; Maes, F. Feasibility of CT-only 3D dose prediction for VMAT prostate plans using deep learning. **2019**, *11850 LNCS*, 10–17, doi:10.1007/978-3-030-32486-5\_2.
195. Avanzo, M.; Pirrone, G.; Mileto, M.; Massarut, S.; Stancanella, J.; Baradaran-Ghahfarokhi, M.; Rink, A.; Barresi, L.; Vinante, L.; Piccoli, E.; et al. Prediction of skin dose in low-kV intraoperative radiotherapy using machine learning models trained on results of in vivo dosimetry. *Medical Physics* **2019**, *46*, 1447–1454, doi:10.1002/mp.13379.
196. Kajikawa, T.; Kadoya, N.; Ito, K.; Takayama, Y.; Chiba, T.; Tomori, S.; Nemoto, H.; Dobashi, S.; Takeda, K.; Jingu, K. A convolutional neural network approach for IMRT dose distribution prediction in prostate cancer patients. *Journal of Radiation Research* **2019**, *60*, 685–693, doi:10.1093/jrr/rz051.

197. Charyyev, S.; Lei, Y.; Harms, J.; Eaton, B.; McDonald, M.; Curran, W.J.; Liu, T.; Zhou, J.; Zhang, R.; Yang, X. High quality proton portal imaging using deep learning for proton radiation therapy: A phantom study. *Biomedical Physics and Engineering Express* **2020**, *6*, doi:10.1088/2057-1976/ab8a74.
198. Jiang, D.; Yan, H.; Chang, N.; Li, T.; Mao, R.; Du, C.; Guo, B.; Liu, J. Convolutional neural network-based dosimetry evaluation of esophageal radiation treatment planning. *Medical Physics* **2020**, *47*, 4735–4742, doi:10.1002/mp.14434.
199. Miki, K.; Kusters, M.; Nakashima, T.; Saito, A.; Kawahara, D.; Nishibuchi, I.; Kimura, T.; Murakami, Y.; Nagata, Y. Evaluation of optimization workflow using custom-made planning through predicted dose distribution for head and neck tumor treatment. *Phys Med* **2020**, *80*, 167–174, doi:10.1016/j.ejmp.2020.10.028.
200. Kandalan, R.N.; Nguyen, D.; Rezaeian, N.H.; Barragán-Montero, A.M.; Breedveld, S.; Namuduri, K.; Jiang, S.; Lin, M.H. Dose prediction with deep learning for prostate cancer radiation therapy: Model adaptation to different treatment planning practices. *Radiotherapy and Oncology* **2020**, *153*, 228–235, doi:10.1016/j.radonc.2020.10.027.
201. Kearney, V.; Chan, J.W.; Wang, T.; Perry, A.; Descovich, M.; Morin, O.; Yom, S.S.; Solberg, T.D. DoseGAN: a generative adversarial network for synthetic dose prediction using attention-gated discrimination and generation. *Scientific Reports* **2020**, *10*, doi:10.1038/s41598-020-68062-7.
202. Li, Y.; He, K.; Ma, M.; Qi, X.; Bai, Y.; Liu, S.; Gao, Y.; Lyu, F.; Jia, C.; Zhao, B.; et al. Using deep learning to model the biological dose prediction on bulky lung cancer patients of partial stereotactic ablation radiotherapy. *Medical Physics* **2020**, *47*, 6540–6550, doi:10.1002/mp.14518.
203. Murakami, Y.; Magome, T.; Matsumoto, K.; Sato, T.; Yoshioka, Y.; Oguchi, M. Fully automated dose prediction using generative adversarial networks in prostate cancer patients. *PLoS ONE* **2020**, *15*, doi:10.1371/journal.pone.0232697.
204. Wang, W.; Sheng, Y.; Wang, C.; Zhang, J.; Li, X.; Palta, M.; Czado, B.; Willett, C.G.; Wu, Q.; Ge, Y.; et al. Fluence Map Prediction Using Deep Learning Models – Direct Plan Generation for Pancreas Stereotactic Body Radiation Therapy. *Frontiers in Artificial Intelligence* **2020**, *3*, doi:10.3389/frai.2020.00068.
205. Babier, A.; Mahmood, R.; McNiven, A.L.; Diamant, A.; Chan, T.C.Y. The importance of evaluating the complete automated knowledge-based planning pipeline. *Phys Med* **2020**, *72*, 73–79, doi:10.1016/j.ejmp.2020.03.016.
206. Xu, J.; Wang, J.; Zhao, F.; Hu, W.; Yao, G.; Lu, Z.; Yan, S. The benefits evaluation of abdominal deep inspiration breath hold based on knowledge-based radiotherapy treatment planning for left-sided breast cancer. *J Appl Clin Med Phys* **2020**, *21*, 89–96, doi:10.1002/acm2.13013.
207. Thomas, M.A.; Fu, Y.; Yang, D. Development and evaluation of machine learning models for voxel dose predictions in online adaptive magnetic resonance guided radiation therapy. *Journal of Applied Clinical Medical Physics* **2020**, *21*, 60–69, doi:10.1002/acm2.12884.
208. Zhan, B.; Xiao, J.; Cao, C.; Peng, X.; Zu, C.; Zhou, J.; Wang, Y. Multi-constraint generative adversarial network for dose prediction in radiotherapy. *Med Image Anal* **2021**, *77*, 102339, doi:10.1016/j.media.2021.102339.
209. Bakx, N.; Bluemink, H.; Hagelaar, E.; van der Sangen, M.; Theuws, J.; Hurkmans, C. Development and evaluation of radiotherapy deep learning dose prediction models for breast cancer. *Physics and Imaging in Radiation Oncology* **2021**, *17*, 65–70, doi:10.1016/j.phro.2021.01.006.
210. Barragán-Montero, A.M.; Thomas, M.; Defraene, G.; Michiels, S.; Haustermans, K.; Lee, J.A.; Sterpin, E. Deep learning dose prediction for IMRT of esophageal cancer: The effect of data quality and quantity on model performance. *Physica Medica* **2021**, *83*, 52–63, doi:10.1016/j.ejmp.2021.02.026.
211. Chen, X.; Men, K.; Zhu, J.; Yang, B.; Li, M.; Liu, Z.; Yan, X.; Yi, J.; Dai, J. DVHnet: A deep learning-based prediction of patient-specific dose volume histograms for radiotherapy planning. *Medical Physics* **2021**, *48*, 2705–2713, doi:10.1002/mp.14758.
212. Douglass, M.J.J.; Keal, J.A. DeepWL: Robust EPID based Winston-Lutz analysis using deep learning, synthetic image generation and optical path-tracing. *Physica Medica* **2021**, *89*, 306–316, doi:10.1016/j.ejmp.2021.08.012.
213. Guerreiro, F.; Seravalli, E.; Janssens, G.O.; Maduro, J.H.; Knopf, A.C.; Langendijk, J.A.; Raaymakers, B.W.; Kontaxis, C. Deep learning prediction of proton and photon dose distributions for paediatric abdominal tumours. *Radiotherapy and Oncology* **2021**, *156*, 36–42, doi:10.1016/j.radonc.2020.11.026.
214. Hedden, N.; Xu, H. Radiation therapy dose prediction for left-sided breast cancers using two-dimensional and three-dimensional deep learning models. *Physica Medica* **2021**, *83*, 101–107, doi:10.1016/j.ejmp.2021.02.021.
215. Jia, M.; Li, X.; Wu, Y.; Yang, Y.; Kasimbeg, P.; Skinner, L.; Wang, L.; Xing, L. Deep learning-augmented radiotherapy visualization with a cylindrical radioluminescence system. *Physics in Medicine and Biology* **2021**, *66*, doi:10.1088/1361-6560/abd673.

216. Jia, M.; Wu, Y.; Yang, Y.; Wang, L.; Chuang, C.; Han, B.; Xing, L. Deep learning-enabled EPID-based 3D dosimetry for dose verification of step-and-shoot radiotherapy. *Medical Physics* **2021**, *48*, 6810–6819, doi:10.1002/mp.15218.
217. Lempart, M.; Benedek, H.; Nilsson, M.; Eliasson, N.; Bäck, S.; Munck af Rosenschöld, P.; Olsson, L.E.; Jamtheim Gustafsson, C. Volumetric modulated arc therapy dose prediction and deliverable treatment plan generation for prostate cancer patients using a densely connected deep learning model. *Physics and Imaging in Radiation Oncology* **2021**, *19*, 112–119, doi:10.1016/j.phro.2021.07.008.
218. Li, X.; Wu, Q.J.; Wu, Q.; Wang, C.; Sheng, Y.; Wang, W.; Stephens, H.; Yin, F.F.; Ge, Y. Insights of an AI agent via analysis of prediction errors: a case study of fluence map prediction for radiation therapy planning. *Phys Med Biol* **2021**, *66*, doi:10.1088/1361-6560/ac3841.
219. Li, Y.; Xiao, F.; Liu, B.; Qi, M.; Lu, X.; Cai, J.; Zhou, L.; Song, T. Deep learning-based 3D in vivo dose reconstruction with an electronic portal imaging device for magnetic resonance-linear accelerators: a proof of concept study. *Physics in Medicine and Biology* **2021**, *66*, doi:10.1088/1361-6560/ac3b66.
220. Liu, S.; Zhang, J.; Li, T.; Yan, H.; Liu, J. Technical Note: A cascade 3D U-Net for dose prediction in radiotherapy. *Medical Physics* **2021**, *48*, 5574–5582, doi:10.1002/mp.15034.
221. Ma, J.; Nguyen, D.; Bai, T.; Folkerts, M.; Jia, X.; Lu, W.; Zhou, L.; Jiang, S. A feasibility study on deep learning-based individualized 3D dose distribution prediction. *Medical Physics* **2021**, *48*, 4438–4447, doi:10.1002/mp.15025.
222. Momin, S.; Lei, Y.; Wang, T.; Fu, Y.; Patel, P.; Jani, A.B.; Curran, W.J.; Liu, T.; Yang, X. Radiation dose prediction for pancreatic stereotactic body radiotherapy via convention neural networks. 2021.
223. Momin, S.; Lei, Y.; Wang, T.; Zhang, J.; Roper, J.; Bradley, J.D.; Curran, W.J.; Patel, P.; Liu, T.; Yang, X. Learning-based dose prediction for pancreatic stereotactic body radiation therapy using dual pyramid adversarial network. *Physics in Medicine and Biology* **2021**, *66*, doi:10.1088/1361-6560/ac0856.
224. Nguyen, D.; Sadeghnejad Barkousaraie, A.; Bohara, G.; Balagopal, A.; McBeth, R.; Lin, M.H.; Jiang, S. A comparison of Monte Carlo dropout and bootstrap aggregation on the performance and uncertainty estimation in radiation therapy dose prediction with deep learning neural networks. *Physics in Medicine and Biology* **2021**, *66*, doi:10.1088/1361-6560/abe04f.
225. Wang, W.; Sheng, Y.; Palta, M.; Czito, B.; Willett, C.; Hito, M.; Yin, F.F.; Wu, Q.; Ge, Y.; Wu, Q.J. Deep Learning-Based Fluence Map Prediction for Pancreas Stereotactic Body Radiation Therapy With Simultaneous Integrated Boost. *Advances in Radiation Oncology* **2021**, *6*, doi:10.1016/j.adro.2021.100672.
226. Wang, W.; Sheng, Y.; Palta, M.; Czito, B.; Willett, C.; Yin, F.F.; Wu, Q.; Ge, Y.; Wu, Q.J. Transfer learning for fluence map prediction in adrenal stereotactic body radiation therapy. *Physics in Medicine and Biology* **2021**, *66*, doi:10.1088/1361-6560/ac3c14.
227. Liu, Y.; Chen, Z.; Wang, J.; Wang, X.; Qu, B.; Ma, L.; Zhao, W.; Zhang, G.; Xu, S. Dose Prediction Using a Three-Dimensional Convolutional Neural Network for Nasopharyngeal Carcinoma With Tomotherapy. *Front Oncol* **2021**, *11*, 752007, doi:10.3389/fonc.2021.752007.
228. Yan, H.; Liu, S.; Zhang, J.; Liu, J.; Li, T. Utilizing pre-determined beam orientation information in dose prediction by 3D fully-connected network for intensity modulated radiotherapy. *Quantitative Imaging in Medicine and Surgery* **2021**, *11*, 4742–4752, doi:10.21037/qims-20-1076.
229. Babier, A.; Zhang, B.; Mahmood, R.; Moore, K.L.; Purdie, T.G.; McNiven, A.L.; Chan, T.C.Y. OpenKBP: The open-access knowledge-based planning grand challenge and dataset. *Med Phys* **2021**, *48*, 5549–5561, doi:10.1002/mp.14845.
230. Dai, G.; Zhang, X.; Liu, W.; Li, Z.; Wang, G.; Liu, Y.; Xiao, Q.; Duan, L.; Li, J.; Song, X.; et al. Analysis of EPID Transmission Fluence Maps Using Machine Learning Models and CNN for Identifying Position Errors in the Treatment of GO Patients. *Frontiers in Oncology* **2021**, *11*, doi:10.3389/fonc.2021.721591.
231. Jiao, S.X.; Wang, M.L.; Chen, L.X.; Liu, X.W. Evaluation of dose-volume histogram prediction for organ-at risk and planning target volume based on machine learning. *Sci Rep* **2021**, *11*, 3117, doi:10.1038/s41598-021-82749-5.
232. Ranjith, C.P.; puzhakkal, N.; Arunkrishnan, M.P.; Vysakh, R.; Irfad, M.P.; Vijayagopal, K.S.; Jayashanker, S. Mean parotid dose prediction model using machine learning regression method for intensity-modulated radiotherapy in head and neck cancer. *Medical Dosimetry* **2021**, *46*, 283–288, doi:10.1016/j.meddos.2021.02.003.
233. Sakai, M.; Nakano, H.; Kawahara, D.; Tanabe, S.; Takizawa, T.; Narita, A.; Yamada, T.; Sakai, H.; Ueda, M.; Sasamoto, R.; et al. Detecting MLC modeling errors using radiomics-based machine learning in patient-specific QA with an EPID for intensity-modulated radiation therapy. *Medical Physics* **2021**, *48*, 991–1002, doi:10.1002/mp.14699.

234. Anetai, Y.; Koike, Y.; Takegawa, H.; Nakamura, S.; Tanigawa, N. Evaluation approach for whole dose distribution in clinical cases using spherical projection and spherical harmonics expansion: spherical coefficient tensor and score method. *J Radiat Res* **2021**, doi:10.1093/jrr/rrab081.
235. Zhang, X.; Dai, G.; Zhong, R.; Zhou, L.; Xiao, Q.; Wang, X.; Lai, J.; Zhao, J.; Li, G.; Bai, S. Radiomics analysis of EPID measurements for patient positioning error detection in thyroid associated ophthalmopathy radiotherapy. *Physica Medica* **2021**, *90*, 1-5, doi:10.1016/j.ejmp.2021.08.014.
236. Zimmermann, L.; Faustmann, E.; Ramsel, C.; Georg, D.; Heilemann, G. Technical Note: Dose prediction for radiation therapy using feature-based losses and One Cycle Learning. *Med Phys* **2021**, *48*, 5562-5566, doi:10.1002/mp.14774.
237. Camps, S.; Houben, T.; Edwards, C.; Antico, M.; Dunnhofer, M.; Martens, E.; Baeza, J.; Vanneste, B.; Van Limbergen, E.; De With, P.; et al. Quality Assessment of Transperineal Ultrasound Images of the Male Pelvic Region Using Deep Learning. 2018.
238. Hansen, D.C.; Landry, G.; Kamp, F.; Li, M.; Belka, C.; Parodi, K.; Kurz, C. ScatterNet: A convolutional neural network for cone-beam CT intensity correction. *Med Phys* **2018**, *45*, 4916-4926, doi:10.1002/mp.13175.
239. Harms, J.; Lei, Y.; Wang, T.; Zhang, R.; Zhou, J.; Tang, X.; Curran, W.J.; Liu, T.; Yang, X. Paired cycle-GAN-based image correction for quantitative cone-beam computed tomography. *Medical Physics* **2019**, *46*, 3998-4009, doi:10.1002/mp.13656.
240. Madesta, F.; Gauer, T.; Sentker, T.; Werner, R. Self-consistent deep learning-based boosting of 4D cone-beam computed tomography reconstruction. **2019**, *1*, doi:10.1117/12.2512980.
241. Nomura, Y.; Xu, Q.; Shirato, H.; Shimizu, S.; Xing, L. Projection-domain scatter correction for cone beam computed tomography using a residual convolutional neural network. *Medical Physics* **2019**, *46*, 3142-3155, doi:10.1002/mp.13583.
242. Lalonde, A.; Winey, B.; Verburg, J.; Paganetti, H.; Sharp, G.C. Evaluation of CBCT scatter correction using deep convolutional neural networks for head and neck adaptive proton therapy. *Phys Med Biol* **2020**, *65*, doi:10.1088/1361-6560/ab9fcb.
243. Chen, G.; Hong, X.; Ding, Q.; Zhang, Y.; Chen, H.; Fu, S.; Zhao, Y.; Zhang, X.; Ji, H.; Wang, G.; et al. AirNet: Fused analytical and iterative reconstruction with deep neural network regularization for sparse-data CT. *Med Phys* **2020**, *47*, 2916-2930, doi:10.1002/mp.14170.
244. Zhao, K.; Zhou, L.; Gao, S.; Wang, X.; Wang, Y.; Zhao, X.; Wang, H.; Liu, K.; Zhu, Y.; Ye, H. Study of low-dose PET image recovery using supervised learning with CycleGAN. *PLoS ONE* **2020**, *15*, doi:10.1371/journal.pone.0238455.
245. Jiang, Z.; Yin, F.F.; Ge, Y.; Ren, L. Enhancing digital tomosynthesis (DTS) for lung radiotherapy guidance using patient-specific deep learning model. *Physics in Medicine and Biology* **2021**, *66*, doi:10.1088/1361-6560/abcde8.
246. Lee, S. Respiratory-correlated 4D digital tomosynthesis with deep convolutional neural networks for image-guided radiation therapy. *Journal of the Korean Physical Society* **2021**, *78*, 169-176, doi:10.1007/s40042-020-00026-6.
247. Liu, Y.W.; Niu, H.J.; Yin, H.X.; Xia, J.J.; Ren, P.L.; Zhang, T.T.; Li, J.; Lv, H.; Ding, H.Y.; Ren, J.L.; et al. Feasibility of Brain Imaging Using a Digital Surround Technology Body Coil: A Study Based on SRGAN-VGG Convolutional Neural Networks(). *Annu Int Conf IEEE Eng Med Biol Soc* **2021**, *2021*, 3734-3737, doi:10.1109/embc46164.2021.9630816.
248. Qiu, R.L.J.; Lei, Y.; Shelton, J.; Higgins, K.; Bradley, J.D.; Curran, W.J.; Liu, T.; Kesarwala, A.H.; Yang, X. Deep learning-based thoracic CBCT correction with histogram matching. *Biomedical Physics and Engineering Express* **2021**, *7*, doi:10.1088/2057-1976/ac3055.
249. Sun, L.; Jiang, Z.; Chang, Y.; Ren, L. Building a patient-specific model using transfer learning for four-dimensional cone beam computed tomography augmentation. *Quantitative Imaging in Medicine and Surgery* **2021**, *11*, 540-555, doi:10.21037/QIMS-20-655.
250. Sentker, T.; Madesta, F.; Werner, R. GDL-FIRE4D: Deep learning-based fast 4D CT image registration. **2018**, *11070 LNCS*, 765-773, doi:10.1007/978-3-030-00928-1\_86.
251. Foote, M.D.; Zimmerman, B.E.; Sawant, A.; Joshi, S.C. Real-Time 2D-3D Deformable Registration with Deep Learning and Application to Lung Radiotherapy Targeting. **2019**, *11492 LNCS*, 265-276, doi:10.1007/978-3-030-20351-1\_20.
252. Heinrich, M.P. Closing the Gap Between Deep and Conventional Image Registration Using Probabilistic Dense Displacement Networks. **2019**, *11769 LNCS*, 50-58, doi:10.1007/978-3-030-32226-7\_6.

253. Liu, C.; Lu, Z.; Ma, L.; Wang, L.; Jin, X.; Si, W. A modality conversion approach to MV-DRs and KV-DRRs registration using information bottlenecked conditional generative adversarial network. *Medical Physics* **2019**, *46*, 4575–4587, doi:10.1002/mp.13770.
254. Eppenhof, K.A.J.; Maspero, M.; Savenije, M.H.F.; de Boer, J.C.J.; van der Voort van Zyp, J.R.N.; Raaymakers, B.W.; Raaijmakers, A.J.E.; Veta, M.; van den Berg, C.A.T.; Pluim, J.P.W. Fast contour propagation for MR-guided prostate radiotherapy using convolutional neural networks. *Med Phys* **2020**, *47*, 1238–1248, doi:10.1002/mp.13994.
255. Lei, Y.; Fu, Y.; Wang, T.; Liu, Y.; Patel, P.; Curran, W.J.; Liu, T.; Yang, X. 4D-CT deformable image registration using multiscale unsupervised deep learning. *Physics in Medicine and Biology* **2020**, *65*, doi:10.1088/1361-6560/ab79c4.
256. Zeng, Q.; Fu, Y.; Tian, Z.; Lei, Y.; Zhang, Y.; Wang, T.; Mao, H.; Liu, T.; Curran, W.J.; Jani, A.B.; et al. Label-driven magnetic resonance imaging (MRI)-transrectal ultrasound (TRUS) registration using weakly supervised learning for MRI-guided prostate radiotherapy. *Physics in Medicine and Biology* **2020**, *65*, doi:10.1088/1361-6560/ab8cd6.
257. Wepppler, S.; Schinkel, C.; Kirkby, C.; Smith, W. Data clustering to select clinically-relevant test cases for algorithm benchmarking and characterization. *Phys Med Biol* **2020**, *65*, 055014, doi:10.1088/1361-6560/ab6e54.
258. Bhattacharjee, R.; Heitz, F.; Noblet, V.; Sharma, S.; Sharma, N. Evaluation of a Learning-based Deformable Registration Method on Abdominal CT Images. *IRBM* **2021**, *42*, 94–105, doi:10.1016/j.irbm.2020.04.002.
259. Fu, Y.; Lei, Y.; Wang, T.; Patel, P.; Jani, A.B.; Mao, H.; Curran, W.J.; Liu, T.; Yang, X. A learning-based nonrigid MRI-CBCT image registration method for MRI-guided prostate cancer radiotherapy. 2021.
260. Fu, Y.; Lei, Y.; Wang, T.; Zhou, J.; Curran, W.J.; Patel, P.; Liu, T.; Yang, X. Deformable MRI-CT liver image registration using convolutional neural network with modality independent neighborhood descriptors. 2021.
261. Fu, Y.; Wang, T.; Lei, Y.; Patel, P.; Jani, A.B.; Curran, W.J.; Liu, T.; Yang, X. Deformable MR-CBCT prostate registration using biomechanically constrained deep learning networks. *Medical Physics* **2021**, *48*, 253–263, doi:10.1002/mp.14584.
262. Momin, S.; Lei, Y.; Wang, T.; Fu, Y.; Patel, P.; Jani, A.B.; Curran, W.J.; Liu, T.; Yang, X. CT-MRI pelvic deformable registration via deep learning. 2021.
263. Momin, S.; Lei, Y.; Wang, T.; Fu, Y.; Patel, P.; Jani, A.B.; Curran, W.J.; Liu, T.; Yang, X. Deep learning-based deformable MRI-CBCT registration of male pelvic region. 2021.
264. Ouyang, X.; Liang, X.; Xie, Y. Preliminary Feasibility Study of Imaging Registration between Supine and Prone Breast CT in Breast Cancer Radiotherapy Using Residual Recursive Cascaded Networks. *IEEE Access* **2021**, *9*, 3315–3325, doi:10.1109/ACCESS.2020.3047829.
265. Chi, W.; Xiang, Z.; Guo, F. Few-shot learning for deformable image registration in 4DCT images. *Br J Radiol* **2022**, *95*, 20210819, doi:10.1259/bjr.20210819.
266. Wodzinski, M.; Ciepiela, I.; Kuszewski, T.; Kedzierawski, P.; Skalski, A. Semi-supervised deep learning-based image registration method with volume penalty for real-time breast tumor bed localization. *Sensors* **2021**, *21*, doi:10.3390/s21124085.
267. Balagopal, A.; Kazemifar, S.; Nguyen, D.; Lin, M.H.; Hannan, R.; Owringi, A.; Jiang, S. Fully automated organ segmentation in male pelvic CT images. *Physics in Medicine and Biology* **2018**, *63*, doi:10.1088/1361-6560/aaf11c.
268. Cardenas, C.E.; McCarroll, R.E.; Court, L.E.; Elgohari, B.A.; Elhalawani, H.; Fuller, C.D.; Kamal, M.J.; Meheissen, M.A.M.; Mohamed, A.S.R.; Rao, A.; et al. Deep Learning Algorithm for Auto-Delineation of High-Risk Oropharyngeal Clinical Target Volumes With Built-In Dice Similarity Coefficient Parameter Optimization Function. *International Journal of Radiation Oncology Biology Physics* **2018**, *101*, 468–478, doi:10.1016/j.ijrobp.2018.01.114.
269. Charron, O.; Lallement, A.; Jarnet, D.; Noblet, V.; Clavier, J.B.; Meyer, P. Automatic detection and segmentation of brain metastases on multimodal MR images with a deep convolutional neural network. *Computers in Biology and Medicine* **2018**, *95*, 43–54, doi:10.1016/j.compbiomed.2018.02.004.
270. Chen, H.; Chen, M.; Lu, W.; Zhao, B.; Jiang, S.; Zhou, L.; Kim, N.; Spangler, A.; Rahimi, A.; Zhen, X.; et al. Deep-learning based surface region selection for deep inspiration breath hold (DIBH) monitoring in left breast cancer radiotherapy. *Physics in Medicine and Biology* **2018**, *63*, doi:10.1088/1361-6560/aaf0d6.
271. Dormer, J.D.; Ma, L.; Halicek, M.; Reilly, C.M.; Schreibmann, E.; Fei, B. Heart Chamber Segmentation from CT Using Convolutional Neural Networks. *Proc SPIE Int Soc Opt Eng* **2018**, *10578*, doi:10.1117/12.2293554.
272. Fang, L.; Liu, J.; Liu, J.; Mao, R. Automatic Segmentation and 3D Reconstruction of Spine Based on FCN and Marching Cubes in CT Volumes. 2018.

273. Feng, Z.; Nie, D.; Wang, L.; Shen, D. Semi-supervised learning for pelvic MR image segmentation based on multi-task residual fully convolutional networks. 2018; pp. 885–888.
274. Fu, Y.; Mazur, T.R.; Wu, X.; Liu, S.; Chang, X.; Lu, Y.; Li, H.H.; Kim, H.; Roach, M.C.; Henke, L.; et al. A novel MRI segmentation method using CNN-based correction network for MRI-guided adaptive radiotherapy. *Medical Physics* **2018**, *45*, 5129–5137, doi:10.1002/mp.13221.
275. Hänsch, A.; Schwier, M.; Gass, T.; Morgas, T.; Haas, B.; Klein, J.; Hahn, H.K. Comparison of different deep learning approaches for parotid gland segmentation from CT images. 2018.
276. Yang, J.; Veeraraghavan, H.; Armato, S.G., 3rd; Farahani, K.; Kirby, J.S.; Kalpathy-Kramer, J.; van Elmpt, W.; Dekker, A.; Han, X.; Feng, X.; et al. Autosegmentation for thoracic radiation treatment planning: A grand challenge at AAPM 2017. *Med Phys* **2018**, *45*, 4568–4581, doi:10.1002/mp.13141.
277. Javaid, U.; Dasnoy, D.; Lee, J.A. Multi-organ Segmentation of Chest CT Images in Radiation Oncology: Comparison of Standard and Dilated UNet. **2018**, *11182 LNCS*, 188–199, doi:10.1007/978-3-030-01449-0\_16.
278. Jungo, A.; Meier, R.; Ermis, E.; Blatti-Moreno, M.; Herrmann, E.; Wiest, R.; Reyes, M. On the effect of inter-observer variability for a reliable estimation of uncertainty of medical image segmentation. **2018**, *11070 LNCS*, 682–690, doi:10.1007/978-3-030-00928-1\_77.
279. Kazemifar, S.; Balagopal, A.; Nguyen, D.; McGuire, S.; Hannan, R.; Jiang, S.; Owringi, A. Segmentation of the prostate and organs at risk in male pelvic CT images using deep learning. *Biomedical Physics and Engineering Express* **2018**, *4*, doi:10.1088/2057-1976/aad100.
280. Li, X.; Deng, Z.; Deng, Q.; Zhang, L.; Niu, T.; Kuang, Y. A Novel Deep Learning Framework for Internal Gross Target Volume Definition from 4D Computed Tomography of Lung Cancer Patients. *IEEE Access* **2018**, *6*, 37775–37783, doi:10.1109/ACCESS.2018.2851027.
281. Lustberg, T.; van Soest, J.; Gooding, M.; Peressutti, D.; Aljabar, P.; van der Stoep, J.; van Elmpt, W.; Dekker, A. Clinical evaluation of atlas and deep learning based automatic contouring for lung cancer. *Radiotherapy and Oncology* **2018**, *126*, 312–317, doi:10.1016/j.radonc.2017.11.012.
282. Men, K.; Zhang, T.; Chen, X.; Chen, B.; Tang, Y.; Wang, S.; Li, Y.; Dai, J. Fully automatic and robust segmentation of the clinical target volume for radiotherapy of breast cancer using big data and deep learning. *Physica Medica* **2018**, *50*, 13–19, doi:10.1016/j.ejmp.2018.05.006.
283. Orasanu, E.; Brosch, T.; Glide-Hurst, C.; Renisch, S. Organ-At-Risk Segmentation in Brain MRI using Model-Based Segmentation: Benefits of Deep Learning-Based Boundary Detectors. *Shape Med Imaging (2018)* **2018**, *11167*, 291–299, doi:10.1007/978-3-030-04747-4\_27.
284. Wang, J.; Lu, J.; Qin, G.; Shen, L.; Sun, Y.; Ying, H.; Zhang, Z.; Hu, W. Technical Note: A deep learning-based autosegmentation of rectal tumors in MR images. *Medical Physics* **2018**, *45*, 2560–2564, doi:10.1002/mp.12918.
285. Zhou, S.; Nie, D.; Adeli, E.; Gao, Y.; Wang, L.; Yin, J.; Shen, D. Fine-Grained Segmentation Using Hierarchical Dilated Neural Networks. **2018**, *11073 LNCS*, 488–496, doi:10.1007/978-3-030-00937-3\_56.
286. Macomber, M.W.; Phillips, M.; Tarapov, I.; Jena, R.; Nori, A.; Carter, D.; Folgoc, L.L.; Criminisi, A.; Nyflot, M.J. Autosegmentation of prostate anatomy for radiation treatment planning using deep decision forests of radiomic features. *Physics in Medicine and Biology* **2018**, *63*, doi:10.1088/1361-6560/aaeaa4.
287. Ninomiya, K.; Arimura, H.; Sasahara, M.; Hirose, T.; Ohga, S.; Umezue, Y.; Honda, H.; Sasaki, T. Bayesian delineation framework of clinical target volumes for prostate cancer radiotherapy using an anatomical-features-based machine learning technique. 2018.
288. Osman, A.F.I. Automated brain tumor segmentation on magnetic resonance images and patient’s overall survival prediction using support vector machines. **2018**, *10670 LNCS*, 435–449, doi:10.1007/978-3-319-75238-9\_37.
289. Peng, T.; Wang, Y.; Xu, T.C.; Shi, L.; Jiang, J.; Zhu, S. Detection of Lung Contour with Closed Principal Curve and Machine Learning. *Journal of Digital Imaging* **2018**, *31*, 520–533, doi:10.1007/s10278-018-0058-y.
290. Rundo, L.; Militello, C.; Tangherloni, A.; Russo, G.; Vitabile, S.; Gilardi, M.C.; Mauri, G. NeXt for neuro-radiosurgery: A fully automatic approach for necrosis extraction in brain tumor MRI using an unsupervised machine learning technique. *International Journal of Imaging Systems and Technology* **2018**, *28*, 21–37, doi:10.1002/ima.22253.
291. Ahmad, M.; Ding, Y.; Qadri, S.F.; Yang, J. Convolutional-neural-network-based feature extraction for liver segmentation from CT images. 2019.

292. Ahn, S.H.; Yeo, A.U.; Kim, K.H.; Kim, C.; Goh, Y.; Cho, S.; Lee, S.B.; Lim, Y.K.; Kim, H.; Shin, D.; et al. Comparative clinical evaluation of atlas and deep-learning-based auto-segmentation of organ structures in liver cancer. *Radiation Oncology* **2019**, *14*, 1-13, doi:10.1186/s13014-019-1392-z.
293. Chen, P.; Xu, C.; Li, X.; Ma, Y.; Sun, F. Two-stage network for oar segmentation. 2019.
294. Dong, X.; Lei, Y.; Wang, T.; Thomas, M.; Tang, L.; Curran, W.J.; Liu, T.; Yang, X. Automatic multiorgan segmentation in thorax CT images using U-net-GAN. *Medical Physics* **2019**, *46*, 2157-2168, doi:10.1002/mp.13458.
295. Elguindi, S.; Zelefsky, M.J.; Jiang, J.; Veeraraghavan, H.; Deasy, J.O.; Hunt, M.A.; Tyagi, N. Deep learning-based auto-segmentation of targets and organs-at-risk for magnetic resonance imaging only planning of prostate radiotherapy. *Physics and Imaging in Radiation Oncology* **2019**, *12*, 80-86, doi:10.1016/j.phro.2019.11.006.
296. Elmahdy, M.S.; Wolterink, J.M.; Sokooti, H.; Išgum, I.; Staring, M. Adversarial Optimization for Joint Registration and Segmentation in Prostate CT Radiotherapy. **2019**, 11769 LNCS, 366-374, doi:10.1007/978-3-030-32226-7\_41.
297. Gium, K.B.; Créhange, G.; Hussain, R.; Walker, P.M.; Lalande, A. Deep generative model-driven multimodal prostate segmentation in radiotherapy. **2019**, 11850 LNCS, 119-127, doi:10.1007/978-3-030-32486-5\_15.
298. Guo, Z.; Guo, N.; Gong, K.; Li, Q. Automatic multi-modality segmentation of gross tumor volume for head and neck cancer radiotherapy using 3D U-Net. 2019.
299. Guo, Z.; Guo, N.; Gong, K.; Zhong, S.; Li, Q. Gross tumor volume segmentation for head and neck cancer radiotherapy using deep dense multi-modality network. *Physics in Medicine and Biology* **2019**, *64*, doi:10.1088/1361-6560/ab440d.
300. Han, M.; Zhang, Y.; Zhou, Q.; Rong, C.; Zhan, Y.; Zhou, X.; Gao, Y. Large-scale evaluation of V-Net for organ segmentation in image guided radiation therapy. 2019.
301. Hänsch, A.; Dicken, V.; Klein, J.; Morgas, T.; Haas, B.; Hahn, H.K. Artifact-driven sampling schemes for robust female pelvis CBCT segmentation using deep learning. 2019.
302. Hänsch, A.; Schwier, M.; Gass, T.; Morgas, T.; Haas, B.; Dicken, V.; Meine, H.; Klein, J.; Hahn, H.K. Evaluation of deep learning methods for parotid gland segmentation from CT images. *Journal of Medical Imaging* **2019**, *6*, doi:10.1117/1.JMI.6.1.011005.
303. Haq, R.; Hotca, A.; Apte, A.; Rimner, A.; Deasy, J.O.; Thor, M. Cardio-pulmonary substructure segmentation of CT images using convolutional neural networks. **2019**, 11850 LNCS, 162-169, doi:10.1007/978-3-030-32486-5\_20.
304. He, K.; Cao, X.; Shi, Y.; Nie, D.; Gao, Y.; Shen, D. Pelvic Organ Segmentation Using Distinctive Curve Guided Fully Convolutional Networks. *IEEE Transactions on Medical Imaging* **2019**, *38*, 585-595, doi:10.1109/TMI.2018.2867837.
305. Holbrook, M.; Blocker, S.J.; Mowery, Y.M.; Badea, C.T. Multi-modal MRI segmentation of sarcoma tumors using convolutional neural networks. 2019.
306. Javaid, U.; Dasnoy, D.; Lee, J.A. Semantic segmentation of computed tomography for radiotherapy with deep learning: Compensating insufficient annotation quality using contour augmentation. 2019.
307. Jiang, J.; Hu, Y.C.; Tyagi, N.; Zhang, P.; Rimner, A.; Deasy, J.O.; Veeraraghavan, H. Cross-modality (CT-MRI) prior augmented deep learning for robust lung tumor segmentation from small MR datasets. *Medical Physics* **2019**, *46*, 4392-4404, doi:10.1002/mp.13695.
308. Juanxiu, T.; Guocai, L.; Shanshan, G.; Dongdong, G.; Junhui, G. Segmentation of organs at risk on head and neck CT for radiotherapy based on 3D deep residual fully convolutional neural network. *Chinese Journal of Biomedical Engineering* **2019**, *38*, 257-265, doi:10.3969/j.issn.0258-8021.2019.03.001.
309. Lei, W.; Wang, H.; Gu, R.; Zhang, S.; Zhang, S.; Wang, G. DeepIGeoS-V2: Deep interactive segmentation of multiple organs from head and neck images with lightweight CNNs. **2019**, 11851 LNCS, 61-69, doi:10.1007/978-3-030-33642-4\_7.
310. Lei, Y.; Liu, Y.; Dong, X.; Tian, S.; Wang, T.; Jiang, X.; Higgins, K.; Beitler, J.J.; Yu, D.S.; Liu, T.; et al. Automatic multi-organ segmentation in thorax CT images using U-Net-GAN. 2019.
311. Lei, Y.; Tian, S.; He, X.; Wang, T.; Wang, B.; Patel, P.; Jani, A.B.; Mao, H.; Curran, W.J.; Liu, T.; et al. Ultrasound prostate segmentation based on multidirectional deeply supervised V-Net. *Medical Physics* **2019**, *46*, 3194-3206, doi:10.1002/mp.13577.
312. Li, S.; Xiao, J.; He, L.; Peng, X.; Yuan, X. The Tumor Target Segmentation of Nasopharyngeal Cancer in CT Images Based on Deep Learning Methods. *Technology in cancer research & treatment* **2019**, *18*, doi:10.1177/1533033819884561.

313. Liang, S.; Tang, F.; Huang, X.; Yang, K.; Zhong, T.; Hu, R.; Liu, S.; Yuan, X.; Zhang, Y. Deep-learning-based detection and segmentation of organs at risk in nasopharyngeal carcinoma computed tomographic images for radiotherapy planning. *European Radiology* **2019**, *29*, 1961–1967, doi:10.1007/s00330-018-5748-9.
314. Lin, L.; Dou, Q.; Jin, Y.M.; Zhou, G.Q.; Tang, Y.Q.; Chen, W.L.; Su, B.A.; Liu, F.; Tao, C.J.; Jiang, N.; et al. Deep learning for automated contouring of primary tumor volumes by MRI for nasopharyngeal carcinoma. *Radiology* **2019**, *291*, 677–686, doi:10.1148/radiol.2019182012.
315. Mak, R.H.; Endres, M.G.; Paik, J.H.; Sergeev, R.A.; Aerts, H.; Williams, C.L.; Lakhani, K.R.; Guinan, E.C. Use of Crowd Innovation to Develop an Artificial Intelligence-Based Solution for Radiation Therapy Targeting. *JAMA Oncology* **2019**, *5*, 654–661, doi:10.1001/jamaoncol.2019.0159.
316. Manko, M. Segmentation of Organs at Risk in Chest Cavity Using 3D Deep Neural Network. 2019; pp. 287–290.
317. Bi, N.; Wang, J.; Zhang, T.; Chen, X.; Xia, W.; Miao, J.; Xu, K.; Wu, L.; Fan, Q.; Wang, L.; et al. Deep Learning Improved Clinical Target Volume Contouring Quality and Efficiency for Postoperative Radiation Therapy in Non-small Cell Lung Cancer. *Front Oncol* **2019**, *9*, 1192, doi:10.3389/fonc.2019.01192.
318. Ocal, H.; Barisci, N. Prostate Segmentation via Fusing the Nested-V-net3d and V-net2d. 2019.
319. Peeken, J.C.; Molina-Romero, M.; Diehl, C.; Menze, B.H.; Straube, C.; Meyer, B.; Zimmer, C.; Wiestler, B.; Combs, S.E. Deep learning derived tumor infiltration maps for personalized target definition in Glioblastoma radiotherapy. *Radiotherapy and Oncology* **2019**, *138*, 166–172, doi:10.1016/j.radonc.2019.06.031.
320. Ren, H.; Li, T.; Pang, Y. A fully automatic framework to localize esophageal tumor for radiation therapy. 2019; pp. 510–515.
321. Schreier, J.; Attanasi, F.; Laaksonen, H. A Full-Image Deep Segmenter for CT Images in Breast Cancer Radiotherapy Treatment. *Frontiers in Oncology* **2019**, *9*, doi:10.3389/fonc.2019.00677.
322. Su, T.Y.; Yang, W.T.; Cheng, T.C.; He, Y.F.; Fang, Y.H. Automatic liver segmentation with CT images based on 3D U-net deep learning approach. 2019.
323. Tappeiner, E.; Pröll, S.; Hönig, M.; Raudaschl, P.F.; Zaffino, P.; Spadea, M.F.; Sharp, G.C.; Schubert, R.; Fritscher, K. Multi-organ segmentation of the head and neck area: an efficient hierarchical neural networks approach. *International Journal of Computer Assisted Radiology and Surgery* **2019**, *14*, 745–754, doi:10.1007/s11548-019-01922-4.
324. Trullo, R.; Petitjean, C.; Dubray, B.; Ruan, S. Multiorgan segmentation using distance-aware adversarial networks. *Journal of Medical Imaging* **2019**, *6*, doi:10.1117/1.JMI.6.1.014001.
325. van der Heyden, B.; Wohlfahrt, P.; Eekers, D.B.P.; Richter, C.; Terhaag, K.; Troost, E.G.C.; Verhaegen, F. Dual-energy CT for automatic organs-at-risk segmentation in brain-tumor patients using a multi-atlas and deep-learning approach. *Scientific Reports* **2019**, *9*, doi:10.1038/s41598-019-40584-9.
326. van der Veen, J.; Willems, S.; Deschuymer, S.; Robben, D.; Crijns, W.; Maes, F.; Nuyts, S. Benefits of deep learning for delineation of organs at risk in head and neck cancer. *Radiotherapy and Oncology* **2019**, *138*, 68–74, doi:10.1016/j.radonc.2019.05.010.
327. van Rooij, W.; Dahele, M.; Ribeiro Brandao, H.; Delaney, A.R.; Slotman, B.J.; Verbakel, W.F. Deep Learning-Based Delineation of Head and Neck Organs at Risk: Geometric and Dosimetric Evaluation. *International Journal of Radiation Oncology Biology Physics* **2019**, *104*, 677–684, doi:10.1016/j.ijrobp.2019.02.040.
328. Vesal, S.; Ravikumar, N.; Maier, A. A 2D dilated residual U-net for multi-organ segmentation in thoracic CT. 2019.
329. Wu, S.; Wang, Z.; Liu, C.; Zhu, C.; Wu, S.; Xiao, K. Automatic Segmentation of Pelvic Organs after Hysterectomy by using Dilated Convolution U-Net++. 2019; pp. 362–367.
330. Dong, X.; Lei, Y.; Tian, S.; Wang, T.; Patel, P.; Curran, W.J.; Jani, A.B.; Liu, T.; Yang, X. Synthetic MRI-aided multi-organ segmentation on male pelvic CT using cycle consistent deep attention network. *Radiother Oncol* **2019**, *141*, 192–199, doi:10.1016/j.radonc.2019.09.028.
331. Yao, Y.; Gou, S.; Wang, M. Segmentation of venous vessel in MRI using transferred convolutional neural network. 2019; pp. 354–360.
332. Zaffino, P.; Pernelle, G.; Mastmeyer, A.; Mehrtash, A.; Zhang, H.; Kikinis, R.; Kapur, T.; Francesca Spadea, M. Fully automatic catheter segmentation in MRI with 3D convolutional neural networks: Application to MRI-guided gynecologic brachytherapy. *Physics in Medicine and Biology* **2019**, *64*, doi:10.1088/1361-6560/ab2f47.
333. Zhong, T.; Huang, X.; Tang, F.; Liang, S.; Deng, X.; Zhang, Y. Boosting-based cascaded convolutional neural networks for the segmentation of CT organs-at-risk in nasopharyngeal carcinoma. *Medical Physics* **2019**, *46*, 5602–5611, doi:10.1002/mp.13825.
334. Zhu, W.; Huang, Y.; Zeng, L.; Chen, X.; Liu, Y.; Qian, Z.; Du, N.; Fan, W.; Xie, X. AnatomyNet: Deep learning for fast and fully automated whole-volume segmentation of head and neck anatomy. *Medical Physics* **2019**, *46*, 576–589, doi:10.1002/mp.13300.

335. Gonella, G.; Binaghi, E.; Nocera, P.; Mordacchini, C. Semi-automatic segmentation of MRI brain metastases combining support vector machine and morphological operators. 2019; pp. 457-463.
336. Gonella, G.; Binaghi, E.; Nocera, P.; Mordacchini, C. Investigating the behaviour of machine learning techniques to segment brain metastases in radiation therapy planning. *Applied Sciences (Switzerland)* **2019**, *9*, doi:10.3390/app9163335.
337. Apte, A.P.; Iyer, A.; Thor, M.; Pandya, R.; Haq, R.; Jiang, J.; LoCastro, E.; Shukla-Dave, A.; Sasankan, N.; Xiao, Y.; et al. Library of deep-learning image segmentation and outcomes model-implementations. *Physica Medica* **2020**, *73*, 190-196, doi:10.1016/j.ejmp.2020.04.011.
338. Arabi, H.; Shiri, I.; Jenabi, E.; Becker, M.; Zaidi, H. Deep Learning-based Automated Delineation of Head and Neck Malignant Lesions from PET Images. 2020.
339. Brouwer, C.L.; Boukerroui, D.; Oliveira, J.; Looney, P.; Steenbakkers, R.J.H.M.; Langendijk, J.A.; Both, S.; Gooding, M.J. Assessment of manual adjustment performed in clinical practice following deep learning contouring for head and neck organs at risk in radiotherapy. *Physics and Imaging in Radiation Oncology* **2020**, *16*, 54-60, doi:10.1016/j.phro.2020.10.001.
340. Brunenberg, E.J.L.; Steinseifer, I.K.; van den Bosch, S.; Kaanders, J.; Brouwer, C.L.; Gooding, M.J.; van Elmpt, W.; Monshouwer, R. External validation of deep learning-based contouring of head and neck organs at risk. *Phys Imaging Radiat Oncol* **2020**, *15*, 8-15, doi:10.1016/j.phro.2020.06.006.
341. Camps, S.M.; Houben, T.; Carneiro, G.; Edwards, C.; Antico, M.; Dunnhofer, M.; Martens, E.G.H.J.; Baeza, J.A.; Vanneste, B.G.L.; van Limbergen, E.J.; et al. Automatic Quality Assessment of Transperineal Ultrasound Images of the Male Pelvic Region, Using Deep Learning. *Ultrasound in Medicine and Biology* **2020**, *46*, 445-454, doi:10.1016/j.ultrasmedbio.2019.10.027.
342. Chen, W.; Li, Y.; Dyer, B.A.; Feng, X.; Rao, S.; Benedict, S.H.; Chen, Q.; Rong, Y. Deep learning vs. atlas-based models for fast auto-segmentation of the masticatory muscles on head and neck CT images. *Radiation Oncology* **2020**, *15*, doi:10.1186/s13014-020-01617-0.
343. Chen, X.; Men, K.; Chen, B.; Tang, Y.; Zhang, T.; Wang, S.; Li, Y.; Dai, J. CNN-Based Quality Assurance for Automatic Segmentation of Breast Cancer in Radiotherapy. *Frontiers in Oncology* **2020**, *10*, doi:10.3389/fonc.2020.00524.
344. Chen, Y.; Ruan, D.; Xiao, J.; Wang, L.; Sun, B.; Saouaf, R.; Yang, W.; Li, D.; Fan, Z. Fully automated multiorgan segmentation in abdominal magnetic resonance imaging with deep neural networks. *Medical Physics* **2020**, *47*, 4971-4982, doi:10.1002/mp.14429.
345. Chen, Y.; Xing, L.; Yu, L.; Bagshaw, H.P.; Buyyounouski, M.K.; Han, B. Automatic intraprostatic lesion segmentation in multiparametric magnetic resonance images with proposed multiple branch UNet. *Medical Physics* **2020**, *47*, 6421-6429, doi:10.1002/mp.14517.
346. Chi, W.; Ma, L.; Wu, J.; Chen, M.; Lu, W.; Gu, X. Deep learning-based medical image segmentation with limited labels. *Physics in Medicine and Biology* **2020**, *65*, doi:10.1088/1361-6560/abc363.
347. Rhee, D.J.; Jhingran, A.; Rigaud, B.; Netherton, T.; Cardenas, C.E.; Zhang, L.; Vedam, S.; Kry, S.; Brock, K.K.; Shaw, W.; et al. Automatic contouring system for cervical cancer using convolutional neural networks. *Med Phys* **2020**, *47*, 5648-5658, doi:10.1002/mp.14467.
348. da Silva, G.L.F.; Diniz, P.S.; Ferreira, J.L.; França, J.V.F.; Silva, A.C.; de Paiva, A.C.; de Cavalcanti, E.A.A. Superpixel-based deep convolutional neural networks and active contour model for automatic prostate segmentation on 3D MRI scans. *Medical and Biological Engineering and Computing* **2020**, *58*, 1947-1964, doi:10.1007/s11517-020-02199-5.
349. Diniz, J.O.B.; Ferreira, J.L.; Diniz, P.H.B.; Silva, A.C.; de Paiva, A.C. Esophagus segmentation from planning CT images using an atlas-based deep learning approach. *Computer Methods and Programs in Biomedicine* **2020**, *197*, doi:10.1016/j.cmpb.2020.105685.
350. Fei, Y.; Zhang, F.; Zu, C.; Hong, M.; Peng, X.; Xiao, J.; Wu, X.; Zhou, J.; Wang, Y. MRF-RFS: A Modified Random Forest Recursive Feature Selection Algorithm for Nasopharyngeal Carcinoma Segmentation. *Methods of Information in Medicine* **2020**, *59*, 151-161, doi:10.1055/s-0040-1721791.
351. Fu, Y.; Lei, Y.; Wang, T.; Tian, S.; Patel, P.; Jani, A.B.; Curran, W.J.; Liu, T.; Yang, X. Pelvic multi-organ segmentation on cone-beam CT for prostate adaptive radiotherapy. *Medical Physics* **2020**, *47*, 3415-3422, doi:10.1002/mp.14196.
352. Duanmu, H.; Kim, J.; Kanakaraj, P.; Wang, A.; Joshua, J.; Kong, J.; Wang, F. AUTOMATIC BRAIN ORGAN SEGMENTATION WITH 3D FULLY CONVOLUTIONAL NEURAL NETWORK FOR RADIATION THERAPY TREATMENT PLANNING. *Proc IEEE Int Symp Biomed Imaging* **2020**, *2020*, 758-762, doi:10.1109/isbi45749.2020.9098485.

353. Hänsch, A.; Hendrik Moltz, J.; Geisler, B.; Engel, C.; Klein, J.; Genghi, A.; Schreier, J.; Morgas, T.; Haas, B. Hippocampus segmentation in CT using deep learning: Impact of MR versus CT-based training contours. *Journal of Medical Imaging* **2020**, *7*, doi:10.1117/1.JMI.7.6.064001.
354. Haq, R.; Hotca, A.; Apte, A.; Rimner, A.; Deasy, J.O.; Thor, M. Cardio-pulmonary substructure segmentation of radiotherapy computed tomography images using convolutional neural networks for clinical outcomes analysis. *Physics and Imaging in Radiation Oncology* **2020**, *14*, 61–66, doi:10.1016/j.phro.2020.05.009.
355. He, H.; Chen, S. Automatic tumor segmentation in PET by deep convolutional U-Net with pre-trained encoder. *Journal of Image and Graphics* **2020**, *25*, 171–179, doi:10.11834/jig.190058.
356. Hsieh, Y.J.; Tseng, H.C.; Chin, C.L.; Shao, Y.H.; Tsai, T.Y. Based on DICOM RT Structure and Multiple Loss Function Deep Learning Algorithm in Organ Segmentation of Head and Neck Image. 2020; pp. 428–435.
357. Ibragimov, B.; Toesca, D.A.S.; Chang, D.T.; Yuan, Y.; Koong, A.C.; Xing, L. Automated hepatobiliary toxicity prediction after liver stereotactic body radiation therapy with deep learning-based portal vein segmentation. *Neurocomputing* **2020**, *392*, 181–188, doi:10.1016/j.neucom.2018.11.112.
358. van der Veen, J.; Willems, S.; Bollen, H.; Maes, F.; Nuyts, S. Deep learning for elective neck delineation: More consistent and time efficient. *Radiother Oncol* **2020**, *153*, 180–188, doi:10.1016/j.radonc.2020.10.007.
359. Zhu, J.; Chen, X.; Yang, B.; Bi, N.; Zhang, T.; Men, K.; Dai, J. Evaluation of Automatic Segmentation Model With Dosimetric Metrics for Radiotherapy of Esophageal Cancer. *Front Oncol* **2020**, *10*, 564737, doi:10.3389/fonc.2020.564737.
360. Jalalifar, A.; Soliman, H.; Sahgal, A.; Sadeghi-Naini, A. A Cascaded Deep-Learning Framework for Segmentation of Metastatic Brain Tumors Before and After Stereotactic Radiation Therapy(). *Annu Int Conf IEEE Eng Med Biol Soc* **2020**, *2020*, 1063–1066, doi:10.1109/embc44109.2020.9175489.
361. Jung, J.; Hong, H.; Jeong, T.; Seong, J.; Kim, J.S. Automatic liver segmentation in abdominal CT images using combined 2.5D and 3D segmentation networks with high-score shape prior for radiotherapy treatment planning. 2020.
362. Ke, L.; Deng, Y.; Xia, W.; Qiang, M.; Chen, X.; Liu, K.; Jing, B.; He, C.; Xie, C.; Guo, X.; et al. Development of a self-constrained 3D DenseNet model in automatic detection and segmentation of nasopharyngeal carcinoma using magnetic resonance images. *Oral Oncology* **2020**, *110*, doi:10.1016/j.oraloncology.2020.104862.
363. Kiljunen, T.; Akram, S.; Niemelä, J.; Löyttyniemi, E.; Seppälä, J.; Heikkilä, J.; Vuolukka, K.; Kääriäinen, O.S.; Heikkilä, V.P.; Lehtiö, K.; et al. A deep learning-based automated CT segmentation of prostate cancer anatomy for radiation therapy planning—a retrospective multicenter study. *Diagnostics* **2020**, *10*, doi:10.3390/diagnostics10110959.
364. Koo, J.; Caudell, J.; Feygelman, V.; Moros, E.; Latifi, K. Training and validation of a commercial deep learning contouring platform. 2020.
365. Léger, J.; Brion, E.; Desbordes, P.; Vleeschouwer, C.D.; Lee, J.A.; Macq, B. Cross-domain data augmentation for deep-learning-based male pelvic organ segmentation in cone beam CT. *Applied Sciences (Switzerland)* **2020**, *10*, doi:10.3390/app10031154.
366. Lei, Y.; Dong, X.; Tian, S.; Wang, T.; Patel, P.; Curran, W.J.; Jani, A.B.; Liu, T.; Yang, X. Multi-organ segmentation in pelvic CT images with CT-based synthetic MRI. 2020.
367. Leung, K.H.; Marashdeh, W.; Wray, R.; Ashrafinia, S.; Pomper, M.G.; Rahmim, A.; Jha, A.K. A physics-guided modular deep-learning based automated framework for tumor segmentation in PET. *Physics in Medicine and Biology* **2020**, *65*, doi:10.1088/1361-6560/ab8535.
368. Liang, S.; Thung, K.H.; Nie, D.; Zhang, Y.; Shen, D. Multi-View Spatial Aggregation Framework for Joint Localization and Segmentation of Organs at Risk in Head and Neck CT Images. *IEEE Transactions on Medical Imaging* **2020**, *39*, 2794–2805, doi:10.1109/TMI.2020.2975853.
369. Liang, X.; Zhao, W.; Hristov, D.H.; Buyyounouski, M.K.; Hancock, S.L.; Bagshaw, H.; Zhang, Q.; Xie, Y.; Xing, L. A deep learning framework for prostate localization in cone beam CT-guided radiotherapy. *Medical Physics* **2020**, *47*, 4233–4240, doi:10.1002/mp.14355.
370. Lin, K.H.; Chang, J.H.; Wang, T.H.; Ong, H.Y.; Chung, P.C. Rectum Segmentation in Brachytherapy Dataset Using Recurrent Network. 2020; pp. 232–236.
371. Liu, Y.; Lei, Y.; Fu, Y.; Wang, T.; Tang, X.; Jiang, X.; Curran, W.J.; Liu, T.; Patel, P.; Yang, X. CT-based multi-organ segmentation using a 3D self-attention U-net network for pancreatic radiotherapy. *Medical Physics* **2020**, *47*, 4316–4324, doi:10.1002/mp.14386.
372. Liu, Z.; Liu, X.; Guan, H.; Zhen, H.; Sun, Y.; Chen, Q.; Chen, Y.; Wang, S.; Qiu, J. Development and validation of a deep learning algorithm for auto-delineation of clinical target volume and organs at risk in cervical cancer radiotherapy. *Radiotherapy and Oncology* **2020**, *153*, 172–179, doi:10.1016/j.radonc.2020.09.060.

373. Mlynarski, P.; Delingette, H.; Alghamdi, H.; Bondiau, P.Y.; Ayache, N. Anatomically consistent CNN-based segmentation of organs-at-risk in cranial radiotherapy. *Journal of Medical Imaging* **2020**, *7*, doi:10.1117/1.JMI.7.1.014502.
374. Morris, E.D.; Aldridge, K.; Ghanem, A.I.; Zhu, S.; Glide-Hurst, C.K. Incorporating sensitive cardiac substructure sparing into radiation therapy planning. *Journal of Applied Clinical Medical Physics* **2020**, *21*, 195–204, doi:10.1002/acm2.13037.
375. Morris, E.D.; Ghanem, A.I.; Dong, M.; Pantelic, M.V.; Walker, E.M.; Glide-Hurst, C.K. Cardiac substructure segmentation with deep learning for improved cardiac sparing. *Medical Physics* **2020**, *47*, 576–586, doi:10.1002/mp.13940.
376. Nemoto, T.; Futakami, N.; Yagi, M.; Kumabe, A.; Takeda, A.; Kunieda, E.; Shigematsu, N. Efficacy evaluation of 2D, 3D U-Net semantic segmentation and atlas-based segmentation of normal lungs excluding the trachea and main bronchi. *Journal of Radiation Research* **2020**, *61*, 257–264, doi:10.1093/jrr/rrz086.
377. Nemoto, T.; Futakami, N.; Yagi, M.; Kunieda, E.; Akiba, T.; Takeda, A.; Shigematsu, N. Simple low-cost approaches to semantic segmentation in radiation therapy planning for prostate cancer using deep learning with non-contrast planning CT images. *Physica Medica* **2020**, *78*, 93–100, doi:10.1016/j.ejmp.2020.09.004.
378. Netherton, T.J.; Rhee, D.J.; Cardenas, C.E.; Chung, C.; Klopp, A.H.; Peterson, C.B.; Howell, R.M.; Balter, P.A.; Court, L.E. Evaluation of a multiview architecture for automatic vertebral labeling of palliative radiotherapy simulation CT images. *Medical Physics* **2020**, *47*, 5592–5608, doi:10.1002/mp.14415.
379. Peng, Z.; Fang, X.; Yan, P.; Shan, H.; Liu, T.; Pei, X.; Wang, G.; Liu, B.; Kalra, M.K.; Xu, X.G. A method of rapid quantification of patient-specific organ doses for CT using deep-learning-based multi-organ segmentation and GPU-accelerated Monte Carlo dose computing. *Medical Physics* **2020**, *47*, 2526–2536, doi:10.1002/mp.14131.
380. Porter, E.; Fuentes, P.; Siddiqui, Z.; Thompson, A.; Levitin, R.; Solis, D.; Myziuk, N.; Guerrero, T. Hippocampus segmentation on noncontrast CT using deep learning. *Medical Physics* **2020**, *47*, 2950–2961, doi:10.1002/mp.14098.
381. Qayyum, A.; Ang, C.K.; Sridevi, S.; Ahamed Khan, M.K.A.; Hong, L.W.; Mazher, M.; Chung, T.D. Hybrid 3D-ResNet deep learning model for automatic segmentation of thoracic organs at risk in CT images. 2020.
382. Savenije, M.H.F.; Maspero, M.; Sikkes, G.G.; Van Der Voort Van Zyp, J.R.N.; T. J. Kotte, A.N.; Bol, G.H.; T. Van Den Berg, C.A. Clinical implementation of MRI-based organs-at-risk auto-segmentation with convolutional networks for prostate radiotherapy. *Radiation Oncology* **2020**, *15*, doi:10.1186/s13014-020-01528-0.
383. Schreier, J.; Genghi, A.; Laaksonen, H.; Morgas, T.; Haas, B. Clinical evaluation of a full-image deep segmentation algorithm for the male pelvis on cone-beam CT and CT. *Radiotherapy and Oncology* **2020**, *145*, 1–6, doi:10.1016/j.radonc.2019.11.021.
384. Shirokikh, B.; Dalechina, A.; Shevtsov, A.; Krivov, E.; Kostjuchenko, V.; Durgaryan, A.; Galkin, M.; Osinov, I.; Golanov, A.; Belyaev, M. Deep learning for brain tumor segmentation in radiosurgery: prospective clinical evaluation. **2020**, *11992 LNCS*, 119–128, doi:10.1007/978-3-030-46640-4\_12.
385. Song, Y.; Hu, J.; Wu, Q.; Xu, F.; Nie, S.; Zhao, Y.; Bai, S.; Yi, Z. Automatic delineation of the clinical target volume and organs at risk by deep learning for rectal cancer postoperative radiotherapy. *Radiotherapy and Oncology* **2020**, *145*, 186–192, doi:10.1016/j.radonc.2020.01.020.
386. Su, T.Y.; Fang, Y.H. Automatic Liver and Spleen Segmentation with CT Images Using Multi-channel U-net Deep Learning Approach. 2020; pp. 33–41.
387. Sun, S.; Liu, Y.; Bai, N.; Tang, H.; Chen, X.; Huang, Q.; Liu, Y.; Xie, X. Attentionanatomy: A Unified Framework for Whole-Body Organs at Risk Segmentation Using Multiple Partially Annotated Datasets. 2020; pp. 451–455.
388. Tang, F.; Liang, S.; Zhong, T.; Huang, X.; Deng, X.; Zhang, Y.; Zhou, L. Postoperative glioma segmentation in CT image using deep feature fusion model guided by multi-sequence MRIs. *European Radiology* **2020**, *30*, 823–832, doi:10.1007/s00330-019-06441-z.
389. Tang, X.; Jafargholi Rangraz, E.; Coudyzer, W.; Bertels, J.; Robben, D.; Schramm, G.; Deckers, W.; Maleux, G.; Baete, K.; Verslype, C.; et al. Whole liver segmentation based on deep learning and manual adjustment for clinical use in SIRT. *European Journal of Nuclear Medicine and Molecular Imaging* **2020**, *47*, 2742–2752, doi:10.1007/s00259-020-04800-3.
390. Tappeiner, E.; Pröll, S.; Fritscher, K.; Welk, M.; Schubert, R. Training of head and neck segmentation networks with shape prior on small datasets. *International Journal of Computer Assisted Radiology and Surgery* **2020**, *15*, 1417–1425, doi:10.1007/s11548-020-02175-2.
391. Vaassen, F.; Hazelaar, C.; Vaniqui, A.; Gooding, M.; van der Heyden, B.; Canters, R.; van Elmpt, W. Evaluation of measures for assessing time-saving of automatic organ-at-risk segmentation in radiotherapy. *Physics and Imaging in Radiation Oncology* **2020**, *13*, 1–6, doi:10.1016/j.phro.2019.12.001.

392. van Dijk, L.V.; Van den Bosch, L.; Aljabar, P.; Peressutti, D.; Both, S.; Steenbakkers Roel, J.H.M.; Langendijk, J.A.; Gooding, M.J.; Brouwer, C.L. Improving automatic delineation for head and neck organs at risk by Deep Learning Contouring. *Radiotherapy and Oncology* **2020**, *142*, 115–123, doi:10.1016/j.radonc.2019.09.022.
393. Weston, A.D.; Korfiatis, P.; Philbrick, K.A.; Conte, G.M.; Kostandy, P.; Sakinis, T.; Zeinoddini, A.; Boonrod, A.; Moynagh, M.; Takahashi, N.; et al. Complete abdomen and pelvis segmentation using U-net variant architecture. *Medical Physics* **2020**, *47*, 5609–5618, doi:10.1002/mp.14422.
394. Wong, J.; Fong, A.; McVicar, N.; Smith, S.; Giambattista, J.; Wells, D.; Kolbeck, C.; Giambattista, J.; Gondara, L.; Alexander, A. Comparing deep learning-based auto-segmentation of organs at risk and clinical target volumes to expert inter-observer variability in radiotherapy planning. *Radiotherapy and Oncology* **2020**, *144*, 152–158, doi:10.1016/j.radonc.2019.10.019.
395. Wu, X.; Wang, Z. Deep-learning-based Detection and Segmentation of Organs at Risk in Head and Neck. 2020; pp. 910–915.
396. Xue, J.; Wang, B.; Ming, Y.; Liu, X.; Jiang, Z.; Wang, C.; Liu, X.; Chen, L.; Qu, J.; Xu, S.; et al. Deep learning-based detection and segmentation-assisted management of brain metastases. *Neuro-Oncology* **2020**, *22*, 505–514, doi:10.1093/neuonc/noz234.
397. Xue, X.; Qin, N.; Hao, X.; Shi, J.; Wu, A.; An, H.; Zhang, H.; Wu, A.; Yang, Y. Sequential and Iterative Auto-Segmentation of High-Risk Clinical Target Volume for Radiotherapy of Nasopharyngeal Carcinoma in Planning CT Images. *Frontiers in Oncology* **2020**, *10*, doi:10.3389/fonc.2020.01134.
398. Liang, Y.; Schott, D.; Zhang, Y.; Wang, Z.; Nasief, H.; Paulson, E.; Hall, W.; Knechtges, P.; Erickson, B.; Li, X.A. Auto-segmentation of pancreatic tumor in multi-parametric MRI using deep convolutional neural networks. *Radiother Oncol* **2020**, *145*, 193–200, doi:10.1016/j.radonc.2020.01.021.
399. Yang, X.; Li, X.; Zhang, X.; Song, F.; Huang, S.; Xia, Y. Segmentation of organs at risk in nasopharyngeal cancer for radiotherapy using a self-adaptive Unet network. *Nan fang yi ke da xue xue bao = Journal of Southern Medical University* **2020**, *40*, 1579–1586, doi:10.12122/j.issn.1673-4254.2020.11.07.
400. Zhang, M.; Young, G.S.; Chen, H.; Li, J.; Qin, L.; McFaline-Figueroa, J.R.; Reardon, D.A.; Cao, X.; Wu, X.; Xu, X. Deep-Learning Detection of Cancer Metastases to the Brain on MRI. *Journal of Magnetic Resonance Imaging* **2020**, *52*, 1227–1236, doi:10.1002/jmri.27129.
401. Zhou, X. Automatic Segmentation of Multiple Organs on 3D CT Images by Using Deep Learning Approaches. *Advances in Experimental Medicine and Biology* **2020**, *1213*, 135–147, doi:10.1007/978-3-030-33128-3\_9.
402. Comelli, A.; Bignardi, S.; Stefano, A.; Russo, G.; Sabini, M.G.; Ippolito, M.; Yezzi, A. Development of a new fully three-dimensional methodology for tumours delineation in functional images. *Computers in Biology and Medicine* **2020**, *120*, doi:10.1016/j.combiomed.2020.103701.
403. Takagi, H.; Kadoya, N.; Kajikawa, T.; Tanaka, S.; Takayama, Y.; Chiba, T.; Ito, K.; Dobashi, S.; Takeda, K.; Jingu, K. Multi-atlas-based auto-segmentation for prostatic urethra using novel prediction of deformable image registration accuracy. *Medical Physics* **2020**, *47*, 3023–3031, doi:10.1002/mp.14154.
404. Terparia, S.; Mir, R.; Tsang, Y.; Clark, C.H.; Patel, R. Automatic evaluation of contours in radiotherapy planning utilising conformity indices and machine learning. *Physics and Imaging in Radiation Oncology* **2020**, *16*, 149–155, doi:10.1016/j.phro.2020.10.008.
405. Balagopal, A.; Morgan, H.; Dohopolski, M.; Timmerman, R.; Shan, J.; Heitjan, D.F.; Liu, W.; Nguyen, D.; Hannan, R.; Garant, A.; et al. PSA-Net: Deep learning-based physician style-aware segmentation network for postoperative prostate cancer clinical target volumes. *Artif Intell Med* **2021**, *121*, 102195, doi:10.1016/j.artmed.2021.102195.
406. Smith, A.G.; Petersen, J.; Terrones-Campos, C.; Berthelsen, A.K.; Forbes, N.J.; Darkner, S.; Specht, L.; Vogelius, I.R. RootPainter3D: Interactive-machine-learning enables rapid and accurate contouring for radiotherapy. *Med Phys* **2022**, *49*, 461–473, doi:10.1002/mp.15353.
407. Amarasinghe, K.C.; Lopes, J.; Beraldo, J.; Kiss, N.; Bucknell, N.; Everitt, S.; Jackson, P.; Litchfield, C.; Denehy, L.; Blyth, B.J.; et al. A Deep Learning Model to Automate Skeletal Muscle Area Measurement on Computed Tomography Images. *Frontiers in Oncology* **2021**, *11*, doi:10.3389/fonc.2021.580806.
408. Anderson, B.M.; Wahid, K.A.; Brock, K.K. Simple Python Module for Conversions Between DICOM Images and Radiation Therapy Structures, Masks, and Prediction Arrays. *Practical Radiation Oncology* **2021**, *11*, 226–229, doi:10.1016/j.prro.2021.02.003.
409. Shirokikh, B.; Shevtsov, A.; Dalechina, A.; Krivov, E.; Kostjuchenko, V.; Golanov, A.; Gombolevskiy, V.; Morozov, S.; Belyaev, M. Accelerating 3D Medical Image Segmentation by Adaptive Small-Scale Target Localization. *J Imaging* **2021**, *7*, doi:10.3390/jimaging7020035.
410. Bai, X.; Hu, Y.; Gong, G.; Yin, Y.; Xia, Y. A deep learning approach to segmentation of nasopharyngeal carcinoma using computed tomography. *Biomedical Signal Processing and Control* **2021**, *64*, doi:10.1016/j.bspc.2020.102246.

411. Balagopal, A.; Nguyen, D.; Morgan, H.; Weng, Y.; Dohopolski, M.; Lin, M.H.; Barkousaraie, A.S.; Gonzalez, Y.; Garant, A.; Desai, N.; et al. A deep learning-based framework for segmenting invisible clinical target volumes with estimated uncertainties for post-operative prostate cancer radiotherapy. *Medical Image Analysis* **2021**, *72*, doi:10.1016/j.media.2021.102101.
412. Behboodi, B.; Rivaz, H.; Lalondrelle, S.; Harris, E. Automatic 3D Ultrasound Segmentation of Uterus Using Deep Learning. 2021.
413. Byun, H.K.; Chang, J.S.; Choi, M.S.; Chun, J.; Jung, J.; Jeong, C.; Kim, J.S.; Chang, Y.; Chung, S.Y.; Lee, S.; et al. Evaluation of deep learning-based autosegmentation in breast cancer radiotherapy. *Radiation Oncology* **2021**, *16*, doi:10.1186/s13014-021-01923-1.
414. Cai, M.; Wang, J.; Yang, Q.; Guo, Y.; Zhang, Z.; Ying, H.; Hu, W.; Hu, C. Combining Images and T-Staging Information to Improve the Automatic Segmentation of Nasopharyngeal Carcinoma Tumors in MR Images. *IEEE Access* **2021**, *9*, 21323–21331, doi:10.1109/ACCESS.2021.3056130.
415. Cao, R.; Pei, X.; Ge, N.; Zheng, C. Clinical Target Volume Auto-Segmentation of Esophageal Cancer for Radiotherapy After Radical Surgery Based on Deep Learning. *Technology in cancer research & treatment* **2021**, *20*, doi:10.1177/15330338211034284.
416. Cao, Z.; Yu, B.; Lei, B.; Ying, H.; Zhang, X.; Chen, D.Z.; Wu, J. Cascaded SE-ResUnet for segmentation of thoracic organs at risk. *Neurocomputing* **2021**, *453*, 357–368, doi:10.1016/j.neucom.2020.08.086.
417. Cardenas, C.E.; Beadle, B.M.; Garden, A.S.; Skinner, H.D.; Yang, J.; Rhee, D.J.; McCarroll, R.E.; Netherton, T.J.; Gay, S.S.; Zhang, L.; et al. Generating High-Quality Lymph Node Clinical Target Volumes for Head and Neck Cancer Radiation Therapy Using a Fully Automated Deep Learning-Based Approach. *International Journal of Radiation Oncology Biology Physics* **2021**, *109*, 801–812, doi:10.1016/j.ijrobp.2020.10.005.
418. Chakrabarty, S.; Sotiras, A.; Milchenko, M.; Lamontagne, P.; Abraham, C.; Robinson, C.; Marcus, D. BrainTumorNet: Multi-task learning for joint segmentation of high-grade glioma and brain metastases from MR images. 2021.
419. Chang, J.H.; Lin, K.H.; Wang, T.H.; Zhou, Y.K.; Chung, P.C. Image Segmentation in 3D Brachytherapy Using Convolutional LSTM. *Journal of Medical and Biological Engineering* **2021**, *41*, 636–651, doi:10.1007/s40846-021-00624-0.
420. Chen, W.; Wang, C.; Zhan, W.; Jia, Y.; Ruan, F.; Qiu, L.; Yang, S.; Li, Y. A comparative study of auto-contouring softwares in delineation of organs at risk in lung cancer and rectal cancer. *Scientific Reports* **2021**, *11*, doi:10.1038/s41598-021-02330-y.
421. Chen, X.; Sun, S.; Bai, N.; Han, K.; Liu, Q.; Yao, S.; Tang, H.; Zhang, C.; Lu, Z.; Huang, Q.; et al. A deep learning-based auto-segmentation system for organs-at-risk on whole-body computed tomography images for radiation therapy. *Radiotherapy and Oncology* **2021**, *160*, 175–184, doi:10.1016/j.radonc.2021.04.019.
422. Chen, X.; Yang, B.; Li, J.; Zhu, J.; Ma, X.; Chen, D.; Hu, Z.; Men, K.; Dai, J. A deep-learning method for generating synthetic kV-CT and improving tumor segmentation for helical tomotherapy of nasopharyngeal carcinoma. *Physics in Medicine and Biology* **2021**, *66*, doi:10.1088/1361-6560/ac3345.
423. Choi, M.S.; Choi, B.S.; Chung, S.Y.; Kim, N.; Chun, J.; Kim, Y.B.; Chang, J.S.; Kim, J.S. Clinical evaluation of atlas- and deep learning-based automatic segmentation of multiple organs and clinical target volumes for breast cancer. *Radiotherapy and Oncology* **2020**, *153*, 139–145, doi:10.1016/j.radonc.2020.09.045.
424. Chung, S.Y.; Chang, J.S.; Choi, M.S.; Chang, Y.; Choi, B.S.; Chun, J.; Keum, K.C.; Kim, J.S.; Kim, Y.B. Clinical feasibility of deep learning-based auto-segmentation of target volumes and organs-at-risk in breast cancer patients after breast-conserving surgery. *Radiation Oncology* **2021**, *16*, doi:10.1186/s13014-021-01771-z.
425. Comelli, A.; Dahiya, N.; Stefano, A.; Vernuccio, F.; Portoghese, M.; Cutaia, G.; Bruno, A.; Salvaggio, G.; Yezzi, A. Deep learning-based methods for prostate segmentation in magnetic resonance imaging. *Applied Sciences (Switzerland)* **2021**, *11*, 1–13, doi:10.3390/app11020782.
426. Luximon, D.C.; Abdulkadir, Y.; Chow, P.E.; Morris, E.D.; Lamb, J.M. Machine-assisted interpolation algorithm for semi-automated segmentation of highly deformable organs. *Med Phys* **2022**, *49*, 41–51, doi:10.1002/mp.15351.
427. Huang, D.; Wang, M.; Zhang, L.; Li, H.; Ye, M.; Li, A. Learning rich features with hybrid loss for brain tumor segmentation. *BMC Med Inform Decis Mak* **2021**, *21*, 63, doi:10.1186/s12911-021-01431-y.
428. Li, D.; Chu, X.; Cui, Y.; Zhao, J.; Zhang, K.; Yang, X. Improved U-Net based on contour prediction for efficient segmentation of rectal cancer. *Comput Methods Programs Biomed* **2022**, *213*, 106493, doi:10.1016/j.cmpb.2021.106493.

429. Dahiya, N.; Alam, S.R.; Zhang, P.; Zhang, S.Y.; Li, T.; Yezzi, A.; Nadeem, S. Multitask 3D CBCT-to-CT translation and organs-at-risk segmentation using physics-based data augmentation. *Medical Physics* **2021**, *48*, 5130–5141, doi:10.1002/mp.15083.
430. Dai, X.; Lei, Y.; Janopaul-Naylor, J.; Wang, T.; Roper, J.; Liu, T.; Curran, W.J.; Patel, P.; Yang, X. Region proposal network for multi-organ segmentation in CT for pancreatic radiotherapy. 2021.
431. Dai, X.; Lei, Y.; Wang, T.; Zhou, J.; Roper, J.; McDonald, M.; Beitler, J.J.; Curran, W.J.; Liu, T.; Yang, X. Residual mask scoring regional convolutional neural network for multi-organ segmentation in head-and-neck CT. 2021.
432. Dai, X.; Lei, Y.; Wynne, J.; Janopaul-Naylor, J.; Wang, T.; Roper, J.; Curran, W.J.; Liu, T.; Patel, P.; Yang, X. Synthetic CT-aided multiorgan segmentation for CBCT-guided adaptive pancreatic radiotherapy. *Medical Physics* **2021**, *48*, 7063–7073, doi:10.1002/mp.15264.
433. de Lima Mendes, R.; da Silva Alves, A.H.; de Souza Gomes, M.; Bertarini, P.L.L.; do Amaral, L.R. Many Layer Transfer Learning Genetic Algorithm (MLTLGA): A New Evolutionary Transfer Learning Approach Applied To Pneumonia Classification. 2021; pp. 2476–2482.
434. Brion, E.; Léger, J.; Barragán-Montero, A.M.; Meert, N.; Lee, J.A.; Macq, B. Domain adversarial networks and intensity-based data augmentation for male pelvic organ segmentation in cone beam CT. *Comput Biol Med* **2021**, *131*, 104269, doi:10.1016/j.compbimed.2021.104269.
435. Fang, Y.; Wang, J.; Ou, X.; Ying, H.; Hu, C.; Zhang, Z.; Hu, W. The impact of training sample size on deep learning-based organ auto-segmentation for head-and-neck patients. *Physics in Medicine and Biology* **2021**, *66*, doi:10.1088/1361-6560/ac2206.
436. Almeida, G.; Figueira, A.R.; Lencart, J.; Tavares, J. Segmentation of male pelvic organs on computed tomography with a deep neural network fine-tuned by a level-set method. *Comput Biol Med* **2021**, *140*, 105107, doi:10.1016/j.compbimed.2021.105107.
437. Gan, W.; Wang, H.; Gu, H.; Duan, Y.; Shao, Y.; Chen, H.; Feng, A.; Huang, Y.; Fu, X.; Ying, Y.; et al. Automatic segmentation of lung tumors on CT images based on a 2D & 3D hybrid convolutional neural network. *British Journal of Radiology* **2021**, *94*, doi:10.1259/BJR.20210038.
438. Gan, Y.; Langendijk, J.A.; Oldehinkel, E.; Scandurra, D.; Sijtsma, N.M.; Lin, Z.; Both, S.; Brouwer, C.L. A novel semi auto-segmentation method for accurate dose and NTCP evaluation in adaptive head and neck radiotherapy. *Radiotherapy and Oncology* **2021**, *164*, 167–174, doi:10.1016/j.radonc.2021.09.019.
439. Garrett Fernandes, M.; Bussink, J.; Stam, B.; Wijsman, R.; Schinagl, D.A.X.; Monshouwer, R.; Teuwen, J. Deep learning model for automatic contouring of cardiovascular substructures on radiotherapy planning CT images: Dosimetric validation and reader study based clinical acceptability testing. *Radiotherapy and Oncology* **2021**, *165*, 52–59, doi:10.1016/j.radonc.2021.10.008.
440. Gonzalez, Y.; Shen, C.; Jung, H.; Nguyen, D.; Jiang, S.B.; Albuquerque, K.; Jia, X. Semi-automatic sigmoid colon segmentation in CT for radiation therapy treatment planning via an iterative 2.5-D deep learning approach. *Medical Image Analysis* **2021**, *68*, doi:10.1016/j.media.2020.101896.
441. Groendahl, A.R.; Skjei Knudtsen, I.; Huynh, B.N.; Mulstad, M.; Moe, Y.M.; Knuth, F.; Tomic, O.; Indahl, U.G.; Torheim, T.; Dale, E.; et al. A comparison of methods for fully automatic segmentation of tumors and involved nodes in PET/CT of head and neck cancers. *Physics in Medicine and Biology* **2021**, *66*, doi:10.1088/1361-6560/abe553.
442. Guo, H.; Wang, J.; Xia, X.; Zhong, Y.; Peng, J.; Zhang, Z.; Hu, W. The dosimetric impact of deep learning-based auto-segmentation of organs at risk on nasopharyngeal and rectal cancer. *Radiation Oncology* **2021**, *16*, doi:10.1186/s13014-021-01837-y.
443. Hague, C.; McPartlin, A.; Lee, L.W.; Hughes, C.; Mullan, D.; Beasley, W.; Green, A.; Price, G.; Whitehurst, P.; Slevin, N.; et al. An evaluation of MR based deep learning auto-contouring for planning head and neck radiotherapy. *Radiotherapy and Oncology* **2021**, *158*, 112–117, doi:10.1016/j.radonc.2021.02.018.
444. He, Y.; Yu, H.; Zhang, S.; Luo, Y.; Fu, Y. Feasibility of Evaluating Result of Auto-segmentation of Target Volumes in Radiotherapy with Medical Consideration Index. *Zhongguo yi liao qi xie za zhi = Chinese journal of medical instrumentation* **2021**, *45*, 573–579, doi:10.3969/j.issn.1671-7104.2021.05.022.
445. Hsu, D.G.; Ballangrud, Å.; Shamseddine, A.; Deasy, J.O.; Veeraraghavan, H.; Cervino, L.; Beal, K.; Aristophanous, M. Automatic segmentation of brain metastases using T1 magnetic resonance and computed tomography images. *Physics in Medicine and Biology* **2021**, *66*, doi:10.1088/1361-6560/ac1835.
446. Huang, Y.J.; Dou, Q.; Wang, Z.X.; Liu, L.Z.; Jin, Y.; Li, C.F.; Wang, L.; Chen, H.; Xu, R.H. 3-D RoI-Aware U-Net for accurate and efficient colorectal tumor segmentation. *IEEE Transactions on Cybernetics* **2021**, *51*, 5397–5408, doi:10.1109/TCYB.2020.2980145.

447. Harms, J.; Lei, Y.; Tian, S.; McCall, N.S.; Higgins, K.A.; Bradley, J.D.; Curran, W.J.; Liu, T.; Yang, X. Automatic delineation of cardiac substructures using a region-based fully convolutional network. *Med Phys* **2021**, *48*, 2867–2876, doi:10.1002/mp.14810.
448. Sanders, J.W.; Mok, H.; Hanania, A.N.; Venkatesan, A.M.; Tang, C.; Bruno, T.L.; Thames, H.D.; Kudchadker, R.J.; Frank, S.J. Computer-aided segmentation on MRI for prostate radiotherapy, part II: Comparing human and computer observer populations and the influence of annotator variability on algorithm variability. *Radiother Oncol* **2021**, doi:10.1016/j.radonc.2021.12.033.
449. Zhang, J.; Gu, L.; Han, G.; Liu, X. AttR2U-Net: A Fully Automated Model for MRI Nasopharyngeal Carcinoma Segmentation Based on Spatial Attention and Residual Recurrent Convolution. *Front Oncol* **2021**, *11*, 816672, doi:10.3389/fonc.2021.816672.
450. Jamtheim Gustafsson, C.; Lempart, M.; Swärd, J.; Persson, E.; Nyholm, T.; Thellenberg Karlsson, C.; Scherman, J. Deep learning-based classification and structure name standardization for organ at risk and target delineations in prostate cancer radiotherapy. *Journal of Applied Clinical Medical Physics* **2021**, *22*, 51–63, doi:10.1002/acm2.13446.
451. Jiang, J.; Luo, Y.; Wang, F.; Fu, Y.; Yu, H.; He, Y. Evaluation on auto-segmentation of the clinical target volume (Ctv) for graves' ophthalmopathy (go) with a fully convolutional network (fcn) on ct images. *Current Medical Imaging* **2021**, *17*, 404–409, doi:10.2174/1573405616666200910141323.
452. Jiang, J.; Riyahi Alam, S.; Chen, I.; Zhang, P.; Rimner, A.; Deasy, J.O.; Veeraraghavan, H. Deep cross-modality (MR-CT) educed distillation learning for cone beam CT lung tumor segmentation. *Medical Physics* **2021**, *48*, 3702–3713, doi:10.1002/mp.14902.
453. Jin, X.; Thomas, M.A.; Dise, J.; Kavanaugh, J.; Hilliard, J.; Zoberi, I.; Robinson, C.G.; Hugo, G.D. Robustness of deep learning segmentation of cardiac substructures in noncontrast computed tomography for breast cancer radiotherapy. *Medical Physics* **2021**, *48*, 7172–7188, doi:10.1002/mp.15237.
454. Kano, Y.; Ikushima, H.; Sasaki, M.; Haga, A. Automatic contour segmentation of cervical cancer using artificial intelligence. *Journal of Radiation Research* **2021**, *62*, 934–944, doi:10.1093/jrr/rrab070.
455. Kazemimoghadam, M.; Chi, W.; Rahimi, A.; Kim, N.; Alluri, P.; Nwachukwu, C.; Lu, W.; Gu, X. Saliency-guided deep learning network for automatic tumor bed volume delineation in post-operative breast irradiation. *Physics in Medicine and Biology* **2021**, *66*, doi:10.1088/1361-6560/ac176d.
456. Kieselmann, J.P.; Fuller, C.D.; Gurney-Champion, O.J.; Oelfke, U. Cross-modality deep learning: Contouring of MRI data from annotated CT data only. *Medical Physics* **2021**, *48*, 1673–1684, doi:10.1002/mp.14619.
457. Kim, N.; Chun, J.; Chang, J.S.; Lee, C.G.; Keum, K.C.; Kim, J.S. Feasibility of continual deep learning-based segmentation for personalized adaptive radiation therapy in head and neck area. *Cancers* **2021**, *13*, 1–19, doi:10.3390/cancers13040702.
458. Korte, J.C.; Hardcastle, N.; Ng, S.P.; Clark, B.; Kron, T.; Jackson, P. Cascaded deep learning-based auto-segmentation for head and neck cancer patients: Organs at risk on T2-weighted magnetic resonance imaging. *Medical Physics* **2021**, *48*, 7757–7772, doi:10.1002/mp.15290.
459. Kos, A.; Bulat, J. Comparison of ASM and CNN based prostate segmentation in CT images. 2021.
460. Langhans, M.; Fechter, T.; Baltas, D.; Binder, H.; Bortfeld, T. Automatic Segmentation of Brain Structures for Treatment Planning Optimization and Target Volume Definition. **2021**, 12587 LNCS, 40–48, doi:10.1007/978-3-030-71827-5\_5.
461. Lei, Y.; Tian, Z.; Wang, T.; Roper, J.; Higgins, K.; Bradley, J.D.; Curran, W.J.; Liu, T.; Yang, X. Mask R-CNN-based tumor localization and segmentation in 4D Lung CT. 2021.
462. Li, Z.; Li, R.; Kiser, K.J.; Giancardo, L.; Jim Zheng, W. Segmenting thoracic cavities with neoplastic lesions: A head-to-head benchmark with fully convolutional neural networks. 2021.
463. Lin, M.; Momin, S.; Lei, Y.; Wang, H.; Curran, W.J.; Liu, T.; Yang, X. Fully automated segmentation of brain tumor from multiparametric MRI using 3D context deep supervised U-Net. *Medical Physics* **2021**, *48*, 4365–4374, doi:10.1002/mp.15032.
464. Liu, C.; Zhang, X.; Si, W.; Ni, X. Multiview Self-Supervised Segmentation for OARs Delineation in Radiotherapy. *Evidence-based Complementary and Alternative Medicine* **2021**, doi:10.1155/2021/8894222.
465. Ghaffari, M.; Samarasinghe, G.; Jameson, M.; Aly, F.; Holloway, L.; Chlap, P.; Koh, E.S.; Sowmya, A.; Oliver, R. Automated post-operative brain tumour segmentation: A deep learning model based on transfer learning from pre-operative images. *Magn Reson Imaging* **2022**, *86*, 28–36, doi:10.1016/j.mri.2021.10.012.

466. Tran, M.T.; Kim, S.H.; Yang, H.J.; Lee, G.S.; Oh, I.J.; Kang, S.R. Esophagus Segmentation in CT Images via Spatial Attention Network and STAPLE Algorithm. *Sensors (Basel)* **2021**, *21*, doi:10.3390/s21134556.
467. Ma, Q.; Zu, C.; Wu, X.; Zhou, J.; Wang, Y. Coarse-To-Fine Segmentation of Organs at Risk in Nasopharyngeal Carcinoma Radiotherapy. **2021**, *12901 LNCS*, 358–368, doi:10.1007/978-3-030-87193-2\_34.
468. Mallios, D.; Cai, X. Deep Rectum Segmentation for Image Guided Radiation Therapy with Synthetic Data. 2021; pp. 975–979.
469. Matkovic, L.A.; Wang, T.; Lei, Y.; Akin-Akintayo, O.O.; Abiodun Ojo, O.A.; Akintayo, A.A.; Roper, J.; Bradley, J.D.; Liu, T.; Schuster, D.M.; et al. Prostate and dominant intraprostatic lesion segmentation on PET/CT using cascaded regional-net. *Physics in Medicine and Biology* **2021**, *66*, doi:10.1088/1361-6560/ac3c13.
470. Min, H.; Dowling, J.; Jameson, M.G.; Cloak, K.; Faustino, J.; Sidhom, M.; Martin, J.; Ebert, M.A.; Haworth, A.; Chlap, P.; et al. Automatic radiotherapy delineation quality assurance on prostate MRI with deep learning in a multicentre clinical trial. *Physics in Medicine and Biology* **2021**, *66*, doi:10.1088/1361-6560/ac25d5.
471. Moe, Y.M.; Groendahl, A.R.; Tomic, O.; Dale, E.; Malinen, E.; Futsaether, C.M. Deep learning-based auto-delineation of gross tumour volumes and involved nodes in PET/CT images of head and neck cancer patients. *European Journal of Nuclear Medicine and Molecular Imaging* **2021**, *48*, 2782–2792, doi:10.1007/s00259-020-05125-x.
472. Momin, S.; Lei, Y.; Tian, Z.; Wang, T.; Roper, J.; Kesarwala, A.H.; Higgins, K.; Bradley, J.D.; Liu, T.; Yang, X. Lung tumor segmentation in 4D CT images using motion convolutional neural networks. *Medical Physics* **2021**, *48*, 7141–7153, doi:10.1002/mp.15204.
473. Morris, E.D.; Ghanem, A.I.; Zhu, S.; Dong, M.; Pantelic, M.V.; Glide-Hurst, C.K. Quantifying inter-fraction cardiac substructure displacement during radiotherapy via magnetic resonance imaging guidance. *Physics and Imaging in Radiation Oncology* **2021**, *18*, 34–40, doi:10.1016/j.phro.2021.03.005.
474. Naser, M.A.; van Dijk, L.V.; He, R.; Wahid, K.A.; Fuller, C.D. Tumor Segmentation in Patients with Head and Neck Cancers Using Deep Learning Based-on Multi-modality PET/CT Images. *Head Neck Tumor Segm (2020)* **2021**, *12603*, 85–98, doi:10.1007/978-3-030-67194-5\_10.
475. Nazari, M.; Jiménez-Franco, L.D.; Schroeder, M.; Kluge, A.; Bronzel, M.; Kimiaei, S. Automated and robust organ segmentation for 3D-based internal dose calculation. *EJNMMI Research* **2021**, *11*, doi:10.1186/s13550-021-00796-5.
476. Nemoto, T.; Futakami, N.; Kunieda, E.; Yagi, M.; Takeda, A.; Akiba, T.; Mutu, E.; Shigematsu, N. Effects of sample size and data augmentation on U-Net-based automatic segmentation of various organs. *Radiological Physics and Technology* **2021**, *14*, 318–327, doi:10.1007/s12194-021-00630-6.
477. Petersen, J.; Isensee, F.; Köhler, G.; Jäger, P.F.; Zimmerer, D.; Neuberger, U.; Wick, W.; Debus, J.; Heiland, S.; Bendszus, M.; et al. Continuous-Time Deep Glioma Growth Models. **2021**, *12903 LNCS*, 83–92, doi:10.1007/978-3-030-87199-4\_8.
478. Poel, R.; Rüfenacht, E.; Hermann, E.; Scheib, S.; Manser, P.; Aebbersold, D.M.; Reyes, M. The predictive value of segmentation metrics on dosimetry in organs at risk of the brain. *Medical Image Analysis* **2021**, *73*, doi:10.1016/j.media.2021.102161.
479. Rasyid, D.A.; Huang, G.H.; Iriawan, N. Segmentation of low-grade gliomas using U-Net VGG16 with transfer learning. 2021; pp. 393–398.
480. Ren, G.; Lam, S.K.; Zhang, J.; Xiao, H.; Cheung, A.L.Y.; Ho, W.Y.; Qin, J.; Cai, J. Investigation of a Novel Deep Learning-Based Computed Tomography Perfusion Mapping Framework for Functional Lung Avoidance Radiotherapy. *Frontiers in Oncology* **2021**, *11*, doi:10.3389/fonc.2021.644703.
481. Ren, J.; Eriksen, J.G.; Nijkamp, J.; Korreman, S.S. Comparing different CT, PET and MRI multi-modality image combinations for deep learning-based head and neck tumor segmentation. *Acta Oncologica* **2021**, *60*, 1399–1406, doi:10.1080/0284186X.2021.1949034.
482. Rigaud, B.; Anderson, B.M.; Yu, Z.H.; Gobeli, M.; Cazoulat, G.; Söderberg, J.; Samuelsson, E.; Lidberg, D.; Ward, C.; Taku, N.; et al. Automatic Segmentation Using Deep Learning to Enable Online Dose Optimization During Adaptive Radiation Therapy of Cervical Cancer. *International Journal of Radiation Oncology Biology Physics* **2021**, *109*, 1096–1110, doi:10.1016/j.ijrobp.2020.10.038.
483. Rodríguez Outeiral, R.; Bos, P.; Al-Mamgani, A.; Jasperse, B.; Simões, R.; van der Heide, U.A. Oropharyngeal primary tumor segmentation for radiotherapy planning on magnetic resonance imaging using deep learning. *Physics and Imaging in Radiation Oncology* **2021**, *19*, 39–44, doi:10.1016/j.phro.2021.06.005.
484. Ruskó, L.; Capala, M.E.; Czupcz, V.; Kolozsvári, B.; Deák-Karancsi, B.; Czabány, R.; Gyalai, B.; Tan, T.; Végyváry, Z.; Borzasi, E.; et al. Deep-learning-based segmentation of organs-at-risk in the head for MR-assisted radiation therapy planning. 2021; pp. 31–43.

485. van Velzen, S.G.M.; Bruns, S.; Wolterink, J.M.; Leiner, T.; Viergever, M.A.; Verkooijen, H.M.; Išgum, I. AI-Based Quantification of Planned Radiation Therapy Dose to Cardiac Structures and Coronary Arteries in Patients With Breast Cancer. *Int J Radiat Oncol Biol Phys* **2022**, *112*, 611–620, doi:10.1016/j.ijrobp.2021.09.009.
486. Luan, S.; Xue, X.; Ding, Y.; Wei, W.; Zhu, B. Adaptive Attention Convolutional Neural Network for Liver Tumor Segmentation. *Front Oncol* **2021**, *11*, 680807, doi:10.3389/fonc.2021.680807.
487. Zhang, S.; Wang, H.; Tian, S.; Zhang, X.; Li, J.; Lei, R.; Gao, M.; Liu, C.; Yang, L.; Bi, X.; et al. A slice classification model-facilitated 3D encoder-decoder network for segmenting organs at risk in head and neck cancer. *J Radiat Res* **2021**, *62*, 94–103, doi:10.1093/jrr/rraa094.
488. Shi, J.; Ding, X.; Liu, X.; Li, Y.; Liang, W.; Wu, J. Automatic clinical target volume delineation for cervical cancer in CT images using deep learning. *Medical Physics* **2021**, *48*, 3968–3981, doi:10.1002/mp.14898.
489. Marin, T.; Zhuo, Y.; Lahoud, R.M.; Tian, F.; Ma, X.; Xing, F.; Moteabbed, M.; Liu, X.; Grogg, K.; Shusharina, N.; et al. Deep learning-based GTV contouring modeling inter- and intra- observer variability in sarcomas. *Radiother Oncol* **2021**, *167*, 269–276, doi:10.1016/j.radonc.2021.09.034.
490. Tahir, A.B.T.; Khan, M.A.; Alhaisoni, M.; Khan, J.A.; Nam, Y.; Wang, S.H.; Javed, K. Deep Learning and Improved Particle Swarm Optimization Based Multimodal Brain Tumor Classification. *Computers, Materials and Continua* **2021**, *68*, 1099–1116, doi:10.32604/cmc.2021.015154.
491. Tang, P.; Zu, C.; Hong, M.; Yan, R.; Peng, X.; Xiao, J.; Wu, X.; Zhou, J.; Zhou, L.; Wang, Y. DA-DSUnet: Dual Attention-based Dense SU-net for automatic head-and-neck tumor segmentation in MRI images. *Neurocomputing* **2021**, *435*, 103–113, doi:10.1016/j.neucom.2020.12.085.
492. Thor, M.; Apte, A.; Haq, R.; Iyer, A.; LoCastro, E.; Deasy, J.O. Using Auto-Segmentation to Reduce Contouring and Dose Inconsistency in Clinical Trials: The Simulated Impact on RTOG 0617. *International Journal of Radiation Oncology Biology Physics* **2021**, *109*, 1619–1626, doi:10.1016/j.ijrobp.2020.11.011.
493. Thor, M.; Iyer, A.; Jiang, J.; Apte, A.; Veeraraghavan, H.; Allgood, N.B.; Kouri, J.A.; Zhou, Y.; LoCastro, E.; Elguindi, S.; et al. Deep learning auto-segmentation and automated treatment planning for trismus risk reduction in head and neck cancer radiotherapy. *Physics and Imaging in Radiation Oncology* **2021**, *19*, 96–101, doi:10.1016/j.phro.2021.07.009.
494. Urago, Y.; Okamoto, H.; Kaneda, T.; Murakami, N.; Kashihara, T.; Takemori, M.; Nakayama, H.; Iijima, K.; Chiba, T.; Kuwahara, J.; et al. Evaluation of auto-segmentation accuracy of cloud-based artificial intelligence and atlas-based models. *Radiation Oncology* **2021**, *16*, doi:10.1186/s13014-021-01896-1.
495. Wang, T.; Lei, Y.; McDonald, M.; Beitler, J.J.; Curran, W.J.; Liu, T.; Yang, X. Multi-organ segmentation on head and neck dual-energy CT using Deep Neural Networks. 2021.
496. Wang, T.; Lei, Y.; Roper, J.; Ghavidel, B.; Beitler, J.J.; McDonald, M.; Curran, W.J.; Liu, T.; Yang, X. Head and neck multi-organ segmentation on dual-energy CT using dual pyramid convolutional neural networks. *Physics in Medicine and Biology* **2021**, *66*, doi:10.1088/1361-6560/abfce2.
497. Wang, W.; Wang, Q.; Jia, M.; Wang, Z.; Yang, C.; Zhang, D.; Wen, S.; Hou, D.; Liu, N.; Wang, P.; et al. Deep Learning-Augmented Head and Neck Organs at Risk Segmentation From CT Volumes. *Frontiers in Physics* **2021**, *9*, doi:10.3389/fphy.2021.743190.
498. Wong, J.; Huang, V.; Giambattista, J.A.; Teke, T.; Kolbeck, C.; Giambattista, J.; Atrchian, S. Training and Validation of Deep Learning-Based Auto-Segmentation Models for Lung Stereotactic Ablative Radiotherapy Using Retrospective Radiotherapy Planning Contours. *Frontiers in Oncology* **2021**, *11*, doi:10.3389/fonc.2021.626499.
499. Wong, J.; Huang, V.; Wells, D.; Giambattista, J.; Giambattista, J.; Kolbeck, C.; Otto, K.; Saibishkumar, E.P.; Alexander, A. Implementation of deep learning-based auto-segmentation for radiotherapy planning structures: a workflow study at two cancer centers. *Radiation Oncology* **2021**, *16*, doi:10.1186/s13014-021-01831-4.
500. Wu, S.; Wu, P.Y.; Chang, H.; Su, F.T.; Liao, H.; Tseng, W.; Liao, C.; Lai, F.; Hsu, F.; Xiao, F. Deep learning-based segmentation of various brain lesions for radiosurgery. *Applied Sciences (Switzerland)* **2021**, *11*, doi:10.3390/app11199180.
501. Jiang, X.; Wang, F.; Chen, Y.; Yan, S. RefineNet-based automatic delineation of the clinical target volume and organs at risk for three-dimensional brachytherapy for cervical cancer. *Ann Transl Med* **2021**, *9*, 1721, doi:10.21037/atm-21-4074.
502. Ye, X.; Guo, D.; Tseng, C.K.; Ge, J.; Hung, T.M.; Pai, P.C.; Ren, Y.; Zheng, L.; Zhu, X.; Peng, L.; et al. Multi-Institutional Validation of Two-Streamed Deep Learning Method for Automated Delineation of Esophageal Gross Tumor Volume Using Planning CT and FDG-PET/CT. *Front Oncol* **2021**, *11*, 785788, doi:10.3389/fonc.2021.785788.
503. Xie, H.; Zhang, J.F.; Li, Q. Application of Deep Convolution Network to Automated Image Segmentation of Chest CT for Patients With Tumor. *Frontiers in Oncology* **2021**, *11*, doi:10.3389/fonc.2021.719398.

504. Xie, X.; Song, Y.; Ye, F.; Yan, H.; Wang, S.; Zhao, X.; Dai, J. Prior information guided auto-contouring of breast gland for deformable image registration in postoperative breast cancer radiotherapy. *Quantitative Imaging in Medicine and Surgery* **2021**, *11*, 4721–4730, doi:10.21037/qims-20-1141.
505. Xu, X.; Lian, C.; Wang, S.; Zhu, T.; Chen, R.C.; Wang, A.Z.; Royce, T.J.; Yap, P.T.; Shen, D.; Lian, J. Asymmetric multi-task attention network for prostate bed segmentation in computed tomography images. *Medical image analysis* **2021**, *72*, 102116, doi:10.1016/j.media.2021.102116.
506. Chang, Y.; Wang, Z.; Peng, Z.; Zhou, J.; Pi, Y.; Xu, X.G.; Pei, X. Clinical application and improvement of a CNN-based autosegmentation model for clinical target volumes in cervical cancer radiotherapy. *J Appl Clin Med Phys* **2021**, *22*, 115–125, doi:10.1002/acm2.13440.
507. Cui, Y.; Arimura, H.; Nakano, R.; Yoshitake, T.; Shioyama, Y.; Yabuuchi, H. Automated approach for segmenting gross tumor volumes for lung cancer stereotactic body radiation therapy using CT-based dense V-networks. *J Radiat Res* **2021**, *62*, 346–355, doi:10.1093/jrr/rraa132.
508. Lei, Y.; Wang, T.; Tian, S.; Fu, Y.; Patel, P.; Jani, A.B.; Curran, W.J.; Liu, T.; Yang, X. Male pelvic CT multi-organ segmentation using synthetic MRI-aided dual pyramid networks. *Phys Med Biol* **2021**, *66*, doi:10.1088/1361-6560/abf2f9.
509. Wu, Y.; Kang, K.; Han, C.; Wang, S.; Chen, Q.; Chen, Y.; Zhang, F.; Liu, Z. A blind randomized validated convolutional neural network for auto-segmentation of clinical target volume in rectal cancer patients receiving neoadjuvant radiotherapy. *Cancer Med* **2022**, *11*, 166–175, doi:10.1002/cam4.4441.
510. Gong, Z.; Guo, C.; Guo, W.; Zhao, D.; Tan, W.; Zhou, W.; Zhang, G. A hybrid approach based on deep learning and level set formulation for liver segmentation in CT images. *J Appl Clin Med Phys* **2022**, *23*, e13482, doi:10.1002/acm2.13482.
511. Liu, Z.; Chen, W.; Guan, H.; Zhen, H.; Shen, J.; Liu, X.; Liu, A.; Li, R.; Geng, J.; You, J.; et al. An Adversarial Deep-Learning-Based Model for Cervical Cancer CTV Segmentation With Multicenter Blinded Randomized Controlled Validation. *Front Oncol* **2021**, *11*, 702270, doi:10.3389/fonc.2021.702270.
512. Zabel, W.J.; Conway, J.L.; Gladwish, A.; Skliarenko, J.; Didiodato, G.; Goorts-Matthews, L.; Michalak, A.; Reistetter, S.; King, J.; Nakonechny, K.; et al. Clinical Evaluation of Deep Learning and Atlas-Based Auto-Contouring of Bladder and Rectum for Prostate Radiation Therapy. *Practical Radiation Oncology* **2021**, *11*, e80–e89, doi:10.1016/j.prro.2020.05.013.
513. Zeleznik, R.; Weiss, J.; Taron, J.; Guthier, C.; Bitterman, D.S.; Hancox, C.; Kann, B.H.; Kim, D.W.; Punglia, R.S.; Bredfeldt, J.; et al. Deep-learning system to improve the quality and efficiency of volumetric heart segmentation for breast cancer. *npj Digital Medicine* **2021**, *4*, doi:10.1038/s41746-021-00416-5.
514. Zhang, G.; Yang, Z.; Huo, B.; Chai, S.; Jiang, S. Automatic segmentation of organs at risk and tumors in CT images of lung cancer from partially labelled datasets with a semi-supervised conditional nnU-Net. *Computer Methods and Programs in Biomedicine* **2021**, *211*, doi:10.1016/j.cmpb.2021.106419.
515. Zhang, Z.; Zhao, T.; Gay, H.; Zhang, W.; Sun, B. Weaving attention U-net: A novel hybrid CNN and attention-based method for organs-at-risk segmentation in head and neck CT images. *Medical Physics* **2021**, *48*, 7052–7062, doi:10.1002/mp.15287.
516. Zhang, Z.; Zhao, T.; Gay, H.; Zhang, W.; Sun, B. Semi-supervised semantic segmentation of prostate and organs-at-risk on 3D pelvic CT images. *Biomedical Physics and Engineering Express* **2021**, *7*, doi:10.1088/2057-1976/ac26e8.
517. Zhang, Z.; Zhao, T.; Gay, H.; Zhang, W.; Sun, B. ARPM-net: A novel CNN-based adversarial method with Markov random field enhancement for prostate and organs at risk segmentation in pelvic CT images. *Medical Physics* **2021**, *48*, 227–237, doi:10.1002/mp.14580.
518. Zhou, H.; Li, Y.; Gu, Y.; Shen, Z.; Zhu, X.; Ge, Y. A deep learning based automatic segmentation approach for anatomical structures in intensity modulation radiotherapy. *Mathematical Biosciences and Engineering* **2021**, *18*, 7506–7524, doi:10.3934/mbe.2021371.
519. Chiu, F.Y.; Le, N.Q.K.; Chen, C.Y. A multiparametric mri-based radiomics analysis to efficiently classify tumor subregions of glioblastoma: A pilot study in machine learning. *Journal of Clinical Medicine* **2021**, *10*, doi:10.3390/jcm10092030.
520. Iqbal, Z.; Luo, D.; Henry, P.; Kazemifar, S.; Rozario, T.; Yan, Y.; Westover, K.; Lu, W.; Nguyen, D.; Long, T.; et al. Accurate real time localization tracking in a clinical environment using Bluetooth Low Energy and deep learning. *PLoS ONE* **2018**, *13*, doi:10.1371/journal.pone.0205392.
521. Karami, E.; Gaede, S.; Lee, T.Y.; Samani, A. A machine learning approach for biomechanics-based tracking of lung tumor during external beam radiation therapy. 2018.
522. Lin, T.; Lin, Y. Markerless tumor gating and tracking for lung cancer radiotherapy based on machine learning techniques. *Intelligent Systems Reference Library* **2018**, *140*, 337–359, doi:10.1007/978-3-319-68843-5\_12.

523. Huang, P.; Yu, G.; Lu, H.; Liu, D.; Xing, L.; Yin, Y.; Kovalchuk, N.; Xing, L.; Li, D. Attention-aware fully convolutional neural network with convolutional long short-term memory network for ultrasound-based motion tracking. *Medical Physics* **2019**, *46*, 2275–2285, doi:10.1002/mp.13510.
524. Kim, T.; Park, J.C.; Gach, H.M.; Chun, J.; Mutic, S. Technical Note: Real-time 3D MRI in the presence of motion for MRI-guided radiotherapy: 3D Dynamic keyhole imaging with super-resolution. *Medical Physics* **2019**, *46*, 4631–4638, doi:10.1002/mp.13748.
525. Zhang, Y.; Huang, X.; Wang, J. Advanced 4-dimensional cone-beam computed tomography reconstruction by combining motion estimation, motion-compensated reconstruction, biomechanical modeling and deep learning. *Visual Computing for Industry, Biomedicine, and Art* **2019**, *2*, doi:10.1186/s42492-019-0033-6.
526. Zhao, W.; Han, B.; Yang, Y.; Buyyounouski, M.; Hancock, S.L.; Bagshaw, H.; Xing, L. Incorporating imaging information from deep neural network layers into image guided radiation therapy (IGRT). *Radiotherapy and Oncology* **2019**, *140*, 167–174, doi:10.1016/j.radonc.2019.06.027.
527. Zhao, W.; Han, B.; Yang, Y.; Buyyounouski, M.; Hancock, S.L.; Bagshaw, H.; Xing, L. Toward markerless image-guided radiotherapy using deep learning for prostate cancer. **2019**, *11850 LNCS*, 34–42, doi:10.1007/978-3-030-32486-5\_5.
528. Zhao, W.; Shen, L.; Wu, Y.; Han, B.; Yang, Y.; Xing, L. Automatic marker-free target positioning and tracking for image-guided radiotherapy and interventions. 2019.
529. Bao, X.; Gao, W.; Xiao, D.; Wang, J.; Jia, F. Bayesian model-based liver respiration motion prediction and evaluation using single-cycle and double-cycle 4D CT images. 2019.
530. Huang, P.; Su, L.; Chen, S.; Cao, K.; Song, Q.; Kazanzides, P.; Iordachita, I.; Lediju Bell, M.A.; Wong, J.W.; Li, D.; et al. 2D ultrasound imaging based intra-fraction respiratory motion tracking for abdominal radiation therapy using machine learning. *Physics in Medicine and Biology* **2019**, *64*, doi:10.1088/1361-6560/ab33db.
531. Lin, H.; Zou, W.; Li, T.; Feigenberg, S.J.; Teo, B.K.K.; Dong, L. A Super-Learner Model for Tumor Motion Prediction and Management in Radiation Therapy: Development and Feasibility Evaluation. *Scientific Reports* **2019**, *9*, doi:10.1038/s41598-019-51338-y.
532. Mori, S.; Sakata, Y.; Hirai, R.; Furuichi, W.; Shimabukuro, K.; Kohno, R.; Koom, W.S.; Kasai, S.; Okaya, K.; Iseki, Y. Commissioning of a fluoroscopic-based real-time markerless tumor tracking system in a superconducting rotating gantry for carbon-ion pencil beam scanning treatment. *Medical Physics* **2019**, *46*, 1561–1574, doi:10.1002/mp.13403.
533. Romaguera, L.V.; Plantefève, R.; Romero, F.P.; Hébert, F.; Carrier, J.F.; Kadoury, S. Prediction of in-plane organ deformation during free-breathing radiotherapy via discriminative spatial transformer networks. *Med Image Anal* **2020**, *64*, 101754, doi:10.1016/j.media.2020.101754.
534. Lei, Y.; Tian, Z.; Wang, T.; Higgins, K.; Bradley, J.D.; Curran, W.J.; Liu, T.; Yang, X. Deep learning-based real-time volumetric imaging for lung stereotactic body radiation therapy: A proof of concept study. *Physics in Medicine and Biology* **2020**, *65*, doi:10.1088/1361-6560/abc303.
535. Liang, Z.; Zhou, Q.; Yang, J.; Zhang, L.; Liu, D.; Tu, B.; Zhang, S. Artificial intelligence-based framework in evaluating intrafraction motion for liver cancer robotic stereotactic body radiation therapy with fiducial tracking. *Med Phys* **2020**, *47*, 5482–5489, doi:10.1002/mp.14501.
536. Liu, F.; Liu, D.; Tian, J.; Xie, X.; Yang, X.; Wang, K. Cascaded one-shot deformable convolutional neural networks: Developing a deep learning model for respiratory motion estimation in ultrasound sequences. *Medical Image Analysis* **2020**, *65*, doi:10.1016/j.media.2020.101793.
537. Roggen, T.; Bobic, M.; Givehchi, N.; Scheib, S.G. Deep Learning model for markerless tracking in spinal SBRT. *Physica Medica* **2020**, *74*, 66–73, doi:10.1016/j.ejmp.2020.04.029.
538. Terpstra, M.L.; Maspero, M.; D'Agata, F.; Stemkens, B.; Intven, M.P.W.; Lagendijk, J.J.W.; Van Den Berg, C.A.T.; Tijssen, R.H.N. Deep learning-based image reconstruction and motion estimation from undersampled radial k-space for real-time MRI-guided radiotherapy. *Physics in Medicine and Biology* **2020**, *65*, doi:10.1088/1361-6560/ab9358.
539. Wang, Y.; Zhong, Z.; Hua, J. DeepOrganNet: On-the-Fly Reconstruction and Visualization of 3D / 4D Lung Models from Single-View Projections by Deep Deformation Network. *IEEE Transactions on Visualization and Computer Graphics* **2020**, *26*, 960–970, doi:10.1109/TVCG.2019.2934369.
540. Zhang, Z.; Beltran, C.; Corner, S.M.; Deisher, A.J.; Herman, M.G.; Kruse, J.J.; Wan Chan Tseung, H.S.; Tryggestad, E.J. A Windows GUI application for real-time image guidance during motion-managed proton beam therapy. 2020.
541. Kai, Y.; Arimura, H.; Ninomiya, K.; Saito, T.; Shimohigashi, Y.; Kuraoka, A.; Maruyama, M.; Toya, R.; Oya, N. Semi-automated prediction approach of target shifts using machine learning with anatomical features between planning and pretreatment CT images in prostate radiotherapy. *Journal of Radiation Research* **2020**, *61*, 285–297, doi:10.1093/jrr/rrz105.

542. Abreu, M.; Fred, A.; Valente, J.; Wang, C.; Plácido da Silva, H. Morphological autoencoders for apnea detection in respiratory gating radiotherapy. *Comput Methods Programs Biomed* **2020**, *195*, 105675, doi:10.1016/j.cmpb.2020.105675.
543. Sakata, Y.; Hirai, R.; Kobuna, K.; Tanizawa, A.; Mori, S. A machine learning-based real-time tumor tracking system for fluoroscopic gating of lung radiotherapy. *Physics in Medicine and Biology* **2020**, *65*, doi:10.1088/1361-6560/ab79c5.
544. Bharadwaj, S.; Prasad, S.; Almekkawy, M. An Upgraded Siamese Neural Network for Motion Tracking in Ultrasound Image Sequences. *IEEE Transactions on Ultrasonics, Ferroelectrics, and Frequency Control* **2021**, *68*, 3515–3527, doi:10.1109/TUFFC.2021.3095299.
545. Chang, P.; Dang, J.; Dai, J.; Sun, W. Real-time respiratory tumor motion prediction based on a temporal convolutional neural network: Prediction model development study. *Journal of Medical Internet Research* **2021**, *23*, doi:10.2196/27235.
546. Dai, X.; Lei, Y.; Roper, J.; Chen, Y.; Bradley, J.D.; Curran, W.J.; Liu, T.; Yang, X. Deep learning-based motion tracking using ultrasound images. *Medical Physics* **2021**, *48*, 7747–7756, doi:10.1002/mp.15321.
547. Amarsee, K.; Ramachandran, P.; Fielding, A.; Lehman, M.; Noble, C.; Perrett, B.; Ning, D. Automatic Detection and Tracking of Marker Seeds Implanted in Prostate Cancer Patients using a Deep Learning Algorithm. *J Med Phys* **2021**, *46*, 80–87, doi:10.4103/jmp.JMP\_117\_20.
548. Penarrubia, L.; Pinon, N.; Roux, E.; Dávila Serrano, E.E.; Richard, J.C.; Orkisz, M.; Sarrut, D. Improving motion-mask segmentation in thoracic CT with multiplanar U-nets. *Med Phys* **2022**, *49*, 420–431, doi:10.1002/mp.15347.
549. Lei, Y.; Momin, S.; Roper, J.; Pretesh, P.; Curran, W.J.; Liu, T.; Yang, X. Motion tracking in 3D ultrasound imaging based on markov-like deep-learning-based deformable registration. 2021.
550. Pastor-Serrano, O.; Lathouwers, D.; Perkó, Z. A semi-supervised autoencoder framework for joint generation and classification of breathing. *Comput Methods Programs Biomed* **2021**, *209*, 106312, doi:10.1016/j.cmpb.2021.106312.
551. Motley, R.; Fielding, A.L.; Ramachandran, P. A feasibility study on the development and use of a deep learning model to automate real-time monitoring of tumor position and assessment of interfraction fiducial marker migration in prostate radiotherapy patients. *Biomed Phys Eng Express* **2021**, doi:10.1088/2057-1976/ac34da.
552. Mezheritsky, T.; Romaguera, L.V.; Le, W.; Kadoury, S. Population-based 3D respiratory motion modelling from convolutional autoencoders for 2D ultrasound-guided radiotherapy. *Med Image Anal* **2022**, *75*, 102260, doi:10.1016/j.media.2021.102260.
553. He, X.; Cai, W.; Li, F.; Fan, Q.; Zhang, P.; Cuaron, J.J.; Cerviño, L.I.; Li, X.; Li, T. Decompose kV projection using neural network for improved motion tracking in paraspinal SBRT. *Med Phys* **2021**, *48*, 7590–7601, doi:10.1002/mp.15295.
554. Chun, J.; Lewis, B.; Ji, Z.; Shin, J.I.; Park, J.C.; Kim, J.S.; Kim, T. Evaluation of super-resolution on 50 pancreatic cancer patients with real-time cine MRI from 0.35T MRgRT. *Biomedical Physics and Engineering Express* **2021**, *7*, doi:10.1088/2057-1976/ac1c51.
555. Friedrich, F.; Hörner-Rieber, J.; Renkamp, C.K.; Klüter, S.; Bachert, P.; Ladd, M.E.; Knowles, B.R. Stability of conventional and machine learning-based tumor auto-segmentation techniques using undersampled dynamic radial bSSFP acquisitions on a 0.35 T hybrid MR-linac system. *Medical Physics* **2021**, *48*, 587–596, doi:10.1002/mp.14659.
556. Wang, G.; Li, Z.; Li, G.; Dai, G.; Xiao, Q.; Bai, L.; He, Y.; Liu, Y.; Bai, S. Real-time liver tracking algorithm based on LSTM and SVR networks for use in surface-guided radiation therapy. *Radiation Oncology* **2021**, *16*, doi:10.1186/s13014-020-01729-7.
557. Hosny, A.; Parmar, C.; Coroller, T.P.; Grossmann, P.; Zeleznik, R.; Kumar, A.; Bussink, J.; Gillies, R.J.; Mak, R.H.; Aerts, H.J.W.L. Deep learning for lung cancer prognostication: A retrospective multi-cohort radiomics study. *PLoS Medicine* **2018**, *15*, doi:10.1371/journal.pmed.1002711.
558. Ibragimov, B.; Toesca, D.; Chang, D.; Yuan, Y.; Koong, A.; Xing, L. Development of deep neural network for individualized hepatobiliary toxicity prediction after liver SBRT. *Medical Physics* **2018**, *45*, 4763–4774, doi:10.1002/mp.13122.
559. Lee, J.; An, J.Y.; Choi, M.G.; Park, S.H.; Kim, S.T.; Lee, J.H.; Sohn, T.S.; Bae, J.M.; Kim, S.; Lee, H.; et al. Deep learning-based survival analysis identified associations between molecular subtype and optimal adjuvant treatment of patients with Gastric cancer. *JCO Clinical Cancer Informatics* **2018**, *2018*, 1–14, doi:10.1200/CCI.17.00065.

560. Cha, Y.J.; Jang, W.I.; Kim, M.S.; Yoo, H.J.; Paik, E.K.; Jeong, H.K.; Youn, S.M. Prediction of Response to Stereotactic Radiosurgery for Brain Metastases Using Convolutional Neural Networks. *Anticancer Res* **2018**, *38*, 5437–5445, doi:10.21873/anticancer.12875.
561. Abdollahi, H.; Mahdavi, S.R.; Mofid, B.; Bakhshandeh, M.; Razzaghdoost, A.; Saadipoor, A.; Tanha, K. Rectal wall MRI radiomics in prostate cancer patients: prediction of and correlation with early rectal toxicity. *International Journal of Radiation Biology* **2018**, *94*, 829–837, doi:10.1080/09553002.2018.1492756.
562. Abdollahi, H.; Mostafaei, S.; Cheraghi, S.; Shiri, I.; Rabi Mahdavi, S.; Kazemnejad, A. Cochlea CT radiomics predicts chemoradiotherapy induced sensorineural hearing loss in head and neck cancer patients: A machine learning and multi-variable modelling study. *Physica Medica* **2018**, *45*, 198–204, doi:10.1016/j.ejmp.2017.10.008.
563. Chao, H.H.; Valdes, G.; Luna, J.M.; Heskel, M.; Berman, A.T.; Solberg, T.D.; Simone, C.B., II. Exploratory analysis using machine learning to predict for chest wall pain in patients with stage I non-small-cell lung cancer treated with stereotactic body radiation therapy. *Journal of Applied Clinical Medical Physics* **2018**, *19*, 539–546, doi:10.1002/acm2.12415.
564. Dean, J.; Wong, K.; Gay, H.; Welsh, L.; Jones, A.B.; Schick, U.; Oh, J.H.; Apte, A.; Newbold, K.; Bhide, S.; et al. Incorporating spatial dose metrics in machine learning-based normal tissue complication probability (NTCP) models of severe acute dysphagia resulting from head and neck radiotherapy. *Clinical and Translational Radiation Oncology* **2018**, *8*, 27–39, doi:10.1016/j.ctro.2017.11.009.
565. Deist, T.M.; Dankers, F.J.W.M.; Valdes, G.; Wijsman, R.; Hsu, I.C.; Oberije, C.; Lustberg, T.; van Soest, J.; Hoebers, F.; Jochems, A.; et al. Machine learning algorithms for outcome prediction in (chemo)radiotherapy: An empirical comparison of classifiers. *Medical Physics* **2018**, *45*, 3449–3459, doi:10.1002/mp.12967.
566. Du, W.; Dickinson, K.; Johnson, C.A.; Saligan, L.N. Identifying Genes to Predict Cancer Radiotherapy-Related Fatigue with Machine-Learning Methods. 2018; p. 527.
567. Elhalawani, H.; Kanwar, A.; Mohamed, A.S.R.; White, A.; Zafereo, J.; Wong, A.; Berends, J.; Abohashem, S.; Williams, B.; Aymard, J.M.; et al. Investigation of radiomic signatures for local recurrence using primary tumor texture analysis in oropharyngeal head and neck cancer patients. *Scientific Reports* **2018**, *8*, doi:10.1038/s41598-017-14687-0.
568. Elhalawani, H.; Lin, T.A.; Volpe, S.; Mohamed, A.S.R.; White, A.L.; Zafereo, J.; Wong, A.J.; Berends, J.E.; AboHashem, S.; Williams, B.; et al. Machine learning applications in head and neck radiation oncology: Lessons from open-source radiomics challenges. *Frontiers in Oncology* **2018**, *8*, doi:10.3389/fonc.2018.00294.
569. Gabryś, H.S.; Buettner, F.; Sterzing, F.; Hauswald, H.; Bangert, M. Design and selection of machine learning methods using radiomics and dosiomics for normal tissue complication probability modeling of xerostomia. *Frontiers in Oncology* **2018**, *8*, doi:10.3389/fonc.2018.00035.
570. Gao, T.; Hao, Y.; Zhang, H.; Hu, L.; Li, H.; Li, H.; Hu, L.H.; Han, B. Predicting pathological response to neoadjuvant chemotherapy in breast cancer patients based on imbalanced clinical data. *Personal and Ubiquitous Computing* **2018**, *22*, 1039–1047, doi:10.1007/s00779-018-1144-3.
571. Lin, H.; Liu, T.; Shi, C.; Petillion, S.; Kindts, I.; Weltens, C.; Depuydt, T.; Song, Y.; Saleh, Z.; Xu, X.G.; et al. Feasibility study of individualized optimal positioning selection for left-sided whole breast radiotherapy: DIBH or prone. *J Appl Clin Med Phys* **2018**, *19*, 218–229, doi:10.1002/acm2.12283.
572. Chen, J.; Chen, H.; Zhong, Z.; Wang, Z.; Hrycushko, B.; Zhou, L.; Jiang, S.; Albuquerque, K.; Gu, X.; Zhen, X. Investigating rectal toxicity associated dosimetric features with deformable accumulated rectal surface dose maps for cervical cancer radiotherapy. *Radiat Oncol* **2018**, *13*, 125, doi:10.1186/s13014-018-1068-0.
573. Lee, S.; Kerns, S.; Ostrer, H.; Rosenstein, B.; Deasy, J.O.; Oh, J.H. Machine Learning on a Genome-wide Association Study to Predict Late Genitourinary Toxicity After Prostate Radiation Therapy. *International Journal of Radiation Oncology Biology Physics* **2018**, *101*, 128–135, doi:10.1016/j.ijrobp.2018.01.054.
574. Li, P.; Ren, H.; Zhang, Y.; Zhou, Z. Fifteen-gene expression based model predicts the survival of clear cell renal cell carcinoma. *Medicine (United States)* **2018**, *97*, doi:10.1097/MD.00000000000011839.
575. Li, S.; Wang, K.; Hou, Z.; Yang, J.; Ren, W.; Gao, S.; Meng, F.; Wu, P.; Liu, B.; Liu, J.; et al. Use of radiomics combined with machine learning method in the recurrence patterns after intensity-modulated radiotherapy for nasopharyngeal carcinoma: A preliminary study. *Frontiers in Oncology* **2018**, *8*, doi:10.3389/fonc.2018.00648.
576. Li, S.; Yang, N.; Li, B.; Zhou, Z.; Hao, H.; Folkert, M.R.; Iyengar, P.; Westover, K.; Choy, H.; Timmerman, R.; et al. A pilot study using kernelled support tensor machine for distant failure prediction in lung SBRT. *Medical Image Analysis* **2018**, *50*, 106–116, doi:10.1016/j.media.2018.09.004.
577. Olar, A.; Goodman, L.D.; Wani, K.M.; Boehling, N.S.; Sharma, D.S.; Mody, R.R.; Gumin, J.; Claus, E.B.; Lang, F.F.; Cloughesy, T.F.; et al. A gene expression signature predicts recurrence-free survival in meningioma. *Oncotarget* **2018**, *9*, 16087–16098, doi:10.18632/oncotarget.24498.

578. Olling, K.; Nyeng, D.W.; Wee, L. Predicting acute odynophagia during lung cancer radiotherapy using observations derived from patient-centred nursing care. *Technical Innovations and Patient Support in Radiation Oncology* **2018**, *5*, 16–20, doi:10.1016/j.tipsro.2018.01.002.
579. Peeken, J.C.; Goldberg, T.; Knie, C.; Komboz, B.; Bernhofer, M.; Pasa, F.; Kessel, K.A.; Tafti, P.D.; Rost, B.; Nüsslin, F.; et al. Treatment-related features improve machine learning prediction of prognosis in soft tissue sarcoma patients. *Strahlentherapie und Onkologie* **2018**, *194*, 824–834, doi:10.1007/s00066-018-1294-2.
580. Rathore, S.; Akbari, H.; Doshi, J.; Shukla, G.; Rozycki, M.; Bilello, M.; Lustig, R.; Davatzikos, C. Radiomic signature of infiltration in peritumoral edema predicts subsequent recurrence in glioblastoma: Implications for personalized radiotherapy planning. *Journal of Medical Imaging* **2018**, *5*, doi:10.1117/1.JMI.5.2.021219.
581. Rathore, S.; Akbari, H.; Doshi, J.; Shukla, G.; Rozycki, M.; Bilello, M.; Lustig, R.; Davatzikos, C. Technical note: A radiomic signature of infiltration in peritumoral edema predicts subsequent recurrence in glioblastoma. 2018.
582. Rogan, P.K.; Zhao, J.Z.L.; Mucaki, E.J. Predicting ionizing radiation exposure using biochemically-inspired genomic machine learning [version 1; referees: 3 approved]. *F1000Research* **2018**, *7*, doi:10.12688/f1000research.14048.1.
583. Setareh, S.; Zahiri Esfahani, M.; Zare Bandamiri, M.; Raeesi, A.; Abbasi, R. Using data mining for survival prediction in patients with colon cancer. *Iranian Journal of Epidemiology* **2018**, *14*, 19–29.
584. Sharma, D.; Sannachi, L.; Karam, I.; Poon, T.; Suraweera, H.; Ouiaoit, K.; Tran, W.T.; Czarnota, G.J. Predicting Radiotherapy Response in Head and Neck Patients Using Quantitative Ultrasound. 2018.
585. Sun, R.; Limkin, E.J.; Vakalopoulou, M.; Dercle, L.; Champiat, S.; Han, S.R.; Verlingue, L.; Brandao, D.; Lancia, A.; Ammari, S.; et al. A radiomics approach to assess tumour-infiltrating CD8 cells and response to anti-PD-1 or anti-PD-L1 immunotherapy: an imaging biomarker, retrospective multicohort study. *The Lancet Oncology* **2018**, *19*, 1180–1191, doi:10.1016/S1470-2045(18)30413-3.
586. Sun, Y.; Reynolds, H.M.; Wraith, D.; Williams, S.; Finnegan, M.E.; Mitchell, C.; Murphy, D.; Haworth, A. Voxel-wise prostate cell density prediction using multiparametric magnetic resonance imaging and machine learning. *Acta Oncologica* **2018**, *57*, 1540–1546, doi:10.1080/0284186X.2018.1468084.
587. Tabl, A.A.; Alkhateeb, A.; Pham, H.Q.; Rueda, L.; ElMaraghy, W.; Ngom, A. A Novel Approach for Identifying Relevant Genes for Breast Cancer Survivability on Specific Therapies. *Evolutionary Bioinformatics* **2018**, *14*, doi:10.1177/1176934318790266.
588. Toesca, D.A.S.; Ibragimov, B.; Koong, A.J.; Xing, L.; Koong, A.C.; Chang, D.T. Strategies for prediction and mitigation of radiation-induced liver toxicity. *Journal of Radiation Research* **2018**, *59*, i40–i49, doi:10.1093/jrr/rrx104.
589. Valdes, G.; Chang, A.J.; Interian, Y.; Owen, K.; Jensen, S.T.; Ungar, L.H.; Cunha, A.; Solberg, T.D.; Hsu, I.C. Salvage HDR Brachytherapy: Multiple Hypothesis Testing Versus Machine Learning Analysis. *International Journal of Radiation Oncology Biology Physics* **2018**, *101*, 694–703, doi:10.1016/j.ijrobp.2018.03.001.
590. Vial, A.; Stirling, D.; Field, M.; Ros, M.; Ritz, C.; Carolan, M.; Holloway, L.; Miller, A.A. A comparative study of machine learning techniques for the improved prediction of NSCLC survival analysis. 2018.
591. Emaus, M.J.; Išgum, I.; Van Velzen, S.G.M.; Van Den Bongard, H.J.G.D.; Gernaat, S.A.M.; Lessmann, N.; Sattler, M.G.A.; Teske, A.J.; Penninkhof, J.; Meijer, H.; et al. Bragatston study protocol: A multicentre cohort study on automated quantification of cardiovascular calcifications on radiotherapy planning CT scans for cardiovascular risk prediction in patients with breast cancer. *BMJ Open* **2019**, *9*, doi:10.1136/bmjopen-2018-028752.
592. Lee, H.; Hong, H.; Seong, J.; Kim, J.S.; Kim, J. Treatment response prediction of hepatocellular carcinoma patients from abdominal ct images with deep convolutional neural networks. **2019**, *11843 LNCS*, 168–176, doi:10.1007/978-3-030-32281-6\_18.
593. Lou, B.; Doken, S.; Zhuang, T.; Wingerter, D.; Gidwani, M.; Mistry, N.; Ladic, L.; Kamen, A.; Abazeed, M.E. An image-based deep learning framework for individualising radiotherapy dose: a retrospective analysis of outcome prediction. *The Lancet Digital Health* **2019**, *1*, e136–e147, doi:10.1016/S2589-7500(19)30058-5.
594. Men, K.; Geng, H.; Zhong, H.; Fan, Y.; Lin, A.; Xiao, Y. A Deep Learning Model for Predicting Xerostomia Due to Radiation Therapy for Head and Neck Squamous Cell Carcinoma in the RTOG 0522 Clinical Trial. *International Journal of Radiation Oncology Biology Physics* **2019**, *105*, 440–447, doi:10.1016/j.ijrobp.2019.06.009.
595. Cui, S.; Luo, Y.; Hsin Tseng, H.; Ten Haken, R.K.; El Naqa, I. Artificial Neural Network with Composite Architectures for Prediction of Local Control in Radiotherapy. *IEEE Trans Radiat Plasma Med Sci* **2019**, *3*, 242–249, doi:10.1109/trpms.2018.2884134.

596. Wang, R.; Weng, Y.; Zhou, Z.; Chen, L.; Hao, H.; Wang, J. Multi-objective ensemble deep learning using electronic health records to predict outcomes after lung cancer radiotherapy. *Physics in Medicine and Biology* **2019**, *64*, doi:10.1088/1361-6560/ab555e.
597. Abdollahi, H.; Mofid, B.; Shiri, I.; Razzaghdoost, A.; Saadipoor, A.; Mahdavi, A.; Galandooz, H.M.; Mahdavi, S.R. Machine learning-based radiomic models to predict intensity-modulated radiation therapy response, Gleason score and stage in prostate cancer. *Radiologia Medica* **2019**, *124*, 555-567, doi:10.1007/s11547-018-0966-4.
598. Mirestean, C.C.; Pagute, O.; Buzea, C.; Iancu, R.I.; Iancu, D.T. Radiomic Machine Learning and Texture Analysis - New Horizons for Head and Neck Oncology. *Maedica (Bucur)* **2019**, *14*, 126-130, doi:10.26574/maedica.2019.14.2.126.
599. Malone, C.; Fennell, L.; Folliard, T.; Kelly, C. Using a neural network to predict deviations in mean heart dose during the treatment of left-sided deep inspiration breath hold patients. *Phys Med* **2019**, *65*, 137-142, doi:10.1016/j.ejmp.2019.08.014.
600. Cameron, J.M.; Butler, H.J.; Smith, B.R.; Hegarty, M.G.; Jenkinson, M.D.; Syed, K.; Brennan, P.M.; Ashton, K.; Dawson, T.; Palmer, D.S.; et al. Developing infrared spectroscopic detection for stratifying brain tumour patients: Glioblastoma multiforme: Vs. lymphoma. *Analyst* **2019**, *144*, 6736-6750, doi:10.1039/c9an01731c.
601. Chang, C.C.; Chen, S.H. Developing a Novel Machine Learning-Based Classification Scheme for Predicting SPCs in Breast Cancer Survivors. *Frontiers in Genetics* **2019**, *10*, doi:10.3389/fgene.2019.00848.
602. Cui, S.; Luo, Y.; Tseng, H.H.; Ten Haken, R.K.; El Naqa, I. Combining handcrafted features with latent variables in machine learning for prediction of radiation-induced lung damage. *Medical Physics* **2019**, *46*, 2497-2511, doi:10.1002/mp.13497.
603. Fan, Y.; Jiang, S.; Hua, M.; Feng, S.; Feng, M.; Wang, R. Machine Learning-Based Radiomics Predicts Radiotherapeutic Response in Patients With Acromegaly. *Frontiers in Endocrinology* **2019**, *10*, doi:10.3389/fendo.2019.00588.
604. Buizza, G.; Paganelli, C.; D'Ippolito, E.; Fontana, G.; Molinelli, S.; Preda, L.; Riva, G.; Iannalfi, A.; Valvo, F.; Orlandi, E.; et al. Radiomics and Dosimetrics for Predicting Local Control after Carbon-Ion Radiotherapy in Skull-Base Chordoma. *Cancers (Basel)* **2021**, *13*, doi:10.3390/cancers13020339.
605. Hectors, S.J.; Cherny, M.; Yadav, K.K.; Beksaç, A.T.; Thulasidass, H.; Lewis, S.; Davicioni, E.; Wang, P.; Tewari, A.K.; Taouli, B. Radiomics features measured with multiparametric magnetic resonance imaging predict prostate cancer aggressiveness. *Journal of Urology* **2019**, *202*, 498-504, doi:10.1097/JU.0000000000000272.
606. Jiang, W.; Lakshminarayanan, P.; Hui, X.; Han, P.; Cheng, Z.; Bowers, M.; Shpitser, I.; Siddiqui, S.; Taylor, R.H.; Quon, H.; et al. Machine Learning Methods Uncover Radiomorphologic Dose Patterns in Salivary Glands that Predict Xerostomia in Patients with Head and Neck Cancer. *Advances in Radiation Oncology* **2019**, *4*, 401-412, doi:10.1016/j.adro.2018.11.008.
607. Bousabarah, K.; Temming, S.; Hoevels, M.; Borggreffe, J.; Baus, W.W.; Ruess, D.; Visser-Vandewalle, V.; Ruge, M.; Kocher, M.; Treuer, H. Radiomic analysis of planning computed tomograms for predicting radiation-induced lung injury and outcome in lung cancer patients treated with robotic stereotactic body radiation therapy. *Strahlenther Onkol* **2019**, *195*, 830-842, doi:10.1007/s00066-019-01452-7.
608. Sheikh, K.; Lee, S.H.; Cheng, Z.; Lakshminarayanan, P.; Peng, L.; Han, P.; McNutt, T.R.; Quon, H.; Lee, J. Predicting acute radiation induced xerostomia in head and neck Cancer using MR and CT Radiomics of parotid and submandibular glands. *Radiat Oncol* **2019**, *14*, 131, doi:10.1186/s13014-019-1339-4.
609. Karami, E.; Soliman, H.; Ruschin, M.; Sahgal, A.; Myrehaug, S.; Tseng, C.L.; Czarnota, G.J.; Jabehdar-Maralani, P.; Chugh, B.; Lau, A.; et al. Quantitative MRI Biomarkers of Stereotactic Radiotherapy Outcome in Brain Metastasis. *Scientific Reports* **2019**, *9*, doi:10.1038/s41598-019-56185-5.
610. Lakshminarayanan, P.; Jiang, W.; Robertson, S.P.; Cheng, Z.; Han, P.; Bowers, M.; Moore, J.A.; Shpitser, I.; Siddiqui, S.A.; Quon, H.; et al. Radio-morphology: Parametric shape-based features in radiotherapy. *Medical Physics* **2019**, *46*, 704-713, doi:10.1002/mp.13323.
611. Lin, Y.T.; Lee, M.T.S.; Huang, Y.C.; Liu, C.K.; Li, Y.T.; Chen, M. Prediction of recurrence-associated death from localized prostate cancer with a charlson comorbidity index-reinforced machine learning model. *Open Medicine (Poland)* **2019**, *14*, 593-606, doi:10.1515/med-2019-0067.
612. Lipkova, J.; Angelikopoulos, P.; Wu, S.; Alberts, E.; Wiestler, B.; Diehl, C.; Preibisch, C.; Pyka, T.; Combs, S.E.; Hadjidakas, P.; et al. Personalized Radiotherapy Design for Glioblastoma: Integrating Mathematical Tumor Models, Multimodal Scans, and Bayesian Inference. *IEEE Transactions on Medical Imaging* **2019**, *38*, 1875-1884, doi:10.1109/TMI.2019.2902044.

613. Luna, J.M.; Chao, H.H.; Diffenderfer, E.S.; Valdes, G.; Chinniah, C.; Ma, G.; Cengel, K.A.; Solberg, T.D.; Berman, A.T.; Simone, C.B., II. Predicting radiation pneumonitis in locally advanced stage II–III non-small cell lung cancer using machine learning. *Radiotherapy and Oncology* **2019**, *133*, 106–112, doi:10.1016/j.radonc.2019.01.003.
614. Marcu, L.G.; Forster, J.C.; Bezak, E. The Potential Role of Radiomics and Radiogenomics in Patient Stratification by Tumor Hypoxia Status. *Journal of the American College of Radiology* **2019**, *16*, 1329–1337, doi:10.1016/j.jacr.2019.05.018.
615. Mizutani, T.; Magome, T.; Igaki, H.; Haga, A.; Nawa, K.; Sekiya, N.; Nakagawa, K. Optimization of treatment strategy by using a machine learning model to predict survival time of patients with malignant glioma after radiotherapy. *Journal of Radiation Research* **2019**, *60*, 818–824, doi:10.1093/jrr/rrz066.
616. Motohashi, H.; Teraoka, T.; Aoki, S.; Ohwada, H. Regression Models and Ranking Method for p53 Inhibitor Candidates Using Machine Learning. 2019; pp. 708–712.
617. Mylona, E.; Lebreton, C.; Fontaine, P.; Supiot, S.; Magne, N.; Crehange, G.; De Crevoisier, R.; Acosta, O. Comparison of machine learning algorithms and oversampling techniques for urinary toxicity prediction after prostate cancer radiotherapy. 2019; pp. 964–971.
618. Nakatsugawa, M.; Cheng, Z.; Kiess, A.; Choflet, A.; Bowers, M.; Utsunomiya, K.; Sugiyama, S.; Wong, J.; Quon, H.; McNutt, T. The Needs and Benefits of Continuous Model Updates on the Accuracy of RT-Induced Toxicity Prediction Models Within a Learning Health System. *International Journal of Radiation Oncology Biology Physics* **2019**, *103*, 460–467, doi:10.1016/j.ijrobp.2018.09.038.
619. Papiez, A.; Badie, C.; Polanska, J. Machine learning techniques combined with dose profiles indicate radiation response biomarkers. *International Journal of Applied Mathematics and Computer Science* **2019**, *29*, 169–178, doi:10.2478/amcs-2019-0013.
620. Peeken, J.C.; Bernhofer, M.; Spraker, M.B.; Pfeiffer, D.; Devecka, M.; Thamer, A.; Shouman, M.A.; Ott, A.; Nüsslin, F.; Mayr, N.A.; et al. CT-based radiomic features predict tumor grading and have prognostic value in patients with soft tissue sarcomas treated with neoadjuvant radiation therapy. *Radiotherapy and Oncology* **2019**, *135*, 187–196, doi:10.1016/j.radonc.2019.01.004.
621. Ryu, S.M.; Lee, S.H.; Kim, E.S.; Eoh, W. Predicting Survival of Patients with Spinal Ependymoma Using Machine Learning Algorithms with the SEER Database. *World Neurosurgery* **2019**, *124*, e331–e339, doi:10.1016/j.wneu.2018.12.091.
622. Shi, L.; Zhang, Y.; Nie, K.; Sun, X.; Niu, T.; Yue, N.; Kwong, T.; Chang, P.; Chow, D.; Chen, J.H.; et al. Machine learning for prediction of chemoradiation therapy response in rectal cancer using pre-treatment and mid-radiation multi-parametric MRI. *Magnetic Resonance Imaging* **2019**, *61*, 33–40, doi:10.1016/j.mri.2019.05.003.
623. Silva, J.; Lezama, O.B.P.; Varela, N.; Borrero, L.A. Integration of Data Mining Classification Techniques and Ensemble Learning for Predicting the Type of Breast Cancer Recurrence. **2019**, *11484 LNCS*, 18–30, doi:10.1007/978-3-030-19223-5\_2.
624. Tian, Z.; Yen, A.; Zhou, Z.; Shen, C.; Albuquerque, K.; Hrycushko, B. A machine-learning-based prediction model of fistula formation after interstitial brachytherapy for locally advanced gynecological malignancies. *Brachytherapy* **2019**, *18*, 530–538, doi:10.1016/j.brachy.2019.04.004.
625. Tran, W.T.; Suraweera, H.; Quaioit, K.; Cardenas, D.; Leong, K.X.; Karam, I.; Poon, I.; Jang, D.; Sannachi, L.; Gangeh, M.; et al. Predictive quantitative ultrasound radiomic markers associated with treatment response in head and neck cancer. *Future Science OA* **2019**, *6*, doi:10.2144/fsoa-2019-0048.
626. Lindsay, W.D.; Ahern, C.A.; Tobias, J.S.; Berlind, C.G.; Chinniah, C.; Gabriel, P.E.; Gee, J.C.; Simone, C.B., 2nd. Automated data extraction and ensemble methods for predictive modeling of breast cancer outcomes after radiation therapy. *Med Phys* **2019**, *46*, 1054–1063, doi:10.1002/mp.13314.
627. Yao, Z.; Zheng, Z.; Ke, W.; Wang, R.; Mu, X.; Sun, F.; Wang, X.; Garg, S.; Shi, W.; He, Y.; et al. Prognostic nomogram for bladder cancer with brain metastases: A National Cancer Database analysis. *Journal of Translational Medicine* **2019**, *17*, doi:10.1186/s12967-019-2109-7.
628. Yu, H.; Wu, H.; Wang, W.; Jolly, S.; Jin, J.Y.; Hu, C.; Kong, F.M. Machine learning to build and validate a model for radiation pneumonitis prediction in patients with non-small cell lung cancer. *Clinical Cancer Research* **2019**, *25*, 4343–4350, doi:10.1158/1078-0432.CCR-18-1084.
629. Zhu, M.; Li, X.; Ge, Y.; Nie, J.; Li, X. The tumor infiltrating leukocyte cell composition are significant markers for prognostics of radiotherapy of rectal cancer as revealed by cell type deconvolution. 2019; pp. 301–305.
630. Afshar, P.; Oikonomou, A.; Plataniotis, K.N.; Mohammadi, A. MDR-SURV: A Multi-Scale Deep Learning-Based Radiomics for Survival Prediction in Pulmonary Malignancies. 2020; pp. 2013–2017.

631. Blanc-Durand, P.; Campedel, L.; Mule, S.; Jegou, S.; Luciani, A.; Pigneur, F.; Itti, E. Prognostic value of anthropometric measures extracted from whole-body CT using deep learning in patients with non-small-cell lung cancer. *European Radiology* **2020**, *30*, 3528–3537, doi:10.1007/s00330-019-06630-w.
632. Dong, T.; Yang, C.; Cui, B.; Zhang, T.; Sun, X.; Song, K.; Wang, L.; Kong, B.; Yang, X. Development and Validation of a Deep Learning Radiomics Model Predicting Lymph Node Status in Operable Cervical Cancer. *Frontiers in Oncology* **2020**, *10*, doi:10.3389/fonc.2020.00464.
633. Gao, Y.; Xiao, X.; Han, B.; Li, G.; Ning, X.; Wang, D.; Cai, W.; Kikinis, R.; Berkovsky, S.; Di Ieva, A.; et al. Deep learning methodology for differentiating glioma recurrence from radiation necrosis using multimodal magnetic resonance imaging: Algorithm development and validation. *JMIR Medical Informatics* **2020**, *8*, doi:10.2196/19805.
634. Hareendran, S.A.; S S, V.C.; Prasad, S.R.; Dhanya, S. Deep Learning Strategies for Survival Prediction in Prophylactic Resection Patients. **2020**, *12145 LNCS*, 575–583, doi:10.1007/978-3-030-53956-6\_53.
635. Ibragimov, B.; Toesca, D.A.S.; Chang, D.T.; Yuan, Y.; Koong, A.C.; Xing, L.; Vogelius, I.R. Deep learning for identification of critical regions associated with toxicities after liver stereotactic body radiation therapy. *Medical Physics* **2020**, *47*, 3721–3731, doi:10.1002/mp.14235.
636. Lee, H.; Hong, H.; Seong, J.; Kim, J.S.; Kim, J. Survival prediction of liver cancer patients from CT images using deep learning and radiomic feature-based regression. 2020.
637. Massi, M.C.; Gasperoni, F.; Ieva, F.; Paganoni, A.M.; Zunino, P.; Manzoni, A.; Franco, N.R.; Veldeman, L.; Ost, P.; Fonteyne, V.; et al. A Deep Learning Approach Validates Genetic Risk Factors for Late Toxicity After Prostate Cancer Radiotherapy in a REQUITE Multi-National Cohort. *Frontiers in Oncology* **2020**, *10*, doi:10.3389/fonc.2020.541281.
638. Chan, S.T.; Ruan, D.; Shaverdian, N.; Raghavan, G.; Cao, M.; Lee, P. Effect of Radiation Doses to the Heart on Survival for Stereotactic Ablative Radiotherapy for Early-stage Non-Small-cell Lung Cancer: An Artificial Neural Network Approach. *Clin Lung Cancer* **2020**, *21*, 136–144.e131, doi:10.1016/j.clcc.2019.10.010.
639. Wang, C.; Liu, C.; Chang, Y.; Lafata, K.; Cui, Y.; Zhang, J.; Sheng, Y.; Mowery, Y.; Brizel, D.; Yin, F.F. Dose-Distribution-Driven PET Image-Based Outcome Prediction (DDD-PIOP): A Deep Learning Study for Oropharyngeal Cancer IMRT Application. *Frontiers in Oncology* **2020**, *10*, doi:10.3389/fonc.2020.01592.
640. Welch, M.L.; McIntosh, C.; McNiven, A.; Huang, S.H.; Zhang, B.B.; Wee, L.; Traverso, A.; O'Sullivan, B.; Hoebbers, F.; Dekker, A.; et al. User-controlled pipelines for feature integration and head and neck radiation therapy outcome predictions. *Physica Medica* **2020**, *70*, 145–152, doi:10.1016/j.ejmp.2020.01.027.
641. Zhu, C.; Lin, S.H.; Jiang, X.; Xiang, Y.; Belal, Z.; Jun, G.; Mohan, R. A novel deep learning model using dosimetric and clinical information for grade 4 radiotherapy-induced lymphopenia prediction. *Physics in Medicine and Biology* **2020**, *65*, doi:10.1088/1361-6560/ab63b6.
642. Akcay, M.; Etiz, D.; Celik, O. Prediction of Survival and Recurrence Patterns by Machine Learning in Gastric Cancer Cases Undergoing Radiation Therapy and Chemotherapy. *Advances in Radiation Oncology* **2020**, *5*, 1179–1187, doi:10.1016/j.adro.2020.07.007.
643. Akcay, M.; Etiz, D.; Celik, O.; Ozen, A. Evaluation of Prognosis in Nasopharyngeal Cancer Using Machine Learning. *Technology in cancer research & treatment* **2020**, *19*, doi:10.1177/1533033820909829.
644. Alcorn, S.R.; Fiksel, J.; Wright, J.L.; Elledge, C.R.; Smith, T.J.; Perng, P.; Saleemi, S.; McNutt, T.R.; DeWeese, T.L.; Zeger, S. Developing an Improved Statistical Approach for Survival Estimation in Bone Metastases Management: The Bone Metastases Ensemble Trees for Survival (BMETS) Model. *International Journal of Radiation Oncology Biology Physics* **2020**, *108*, 554–563, doi:10.1016/j.ijrobp.2020.05.023.
645. Baumann, B.C.; Mitra, N.; Harton, J.G.; Xiao, Y.; Wojcieszynski, A.P.; Gabriel, P.E.; Zhong, H.; Geng, H.; Doucette, A.; Wei, J.; et al. Comparative Effectiveness of Proton vs Photon Therapy as Part of Concurrent Chemoradiotherapy for Locally Advanced Cancer. *JAMA Oncology* **2020**, *6*, 237–246, doi:10.1001/jamaoncol.2019.4889.
646. Chatterjee, A.; Vallières, M.; Seuntjens, J. Overlooked pitfalls in multi-class machine learning classification in radiation oncology and how to avoid them. *Physica Medica* **2020**, *70*, 96–100, doi:10.1016/j.ejmp.2020.01.009.
647. Damiani, G.; Grossi, E.; Berti, E.; Conic, R.R.Z.; Radhakrishna, U.; Pacifico, A.; Bragazzi, N.L.; Piccinno, R.; Linder, D. Artificial neural networks allow response prediction in squamous cell carcinoma of the scalp treated with radiotherapy. *Journal of the European Academy of Dermatology and Venereology* **2020**, *34*, 1369–1373, doi:10.1111/jdv.16210.
648. Fang, M.; Kan, Y.; Dong, D.; Yu, T.; Zhao, N.; Jiang, W.; Zhong, L.; Hu, C.; Luo, Y.; Tian, J. Multi-Habitat Based Radiomics for the Prediction of Treatment Response to Concurrent Chemotherapy and Radiation Therapy in Locally Advanced Cervical Cancer. *Frontiers in Oncology* **2020**, *10*, doi:10.3389/fonc.2020.00563.
649. De Araujo Faria, V.; Azimbagirad, M.; Viani Arruda, G.; Fernandes Pavoni, J.; Cezar Felipe, J.; Dos Santos, E.; Murta Junior, L.O. Prediction of Radiation-Related Dental Caries Through PyRadiomics Features and Artificial Neural Network on Panoramic Radiography. *J Digit Imaging* **2021**, *34*, 1237–1248, doi:10.1007/s10278-021-00487-6.

650. Filias, F.; Mylona, E.; Blekos, K.; Supiot, S.; De Crevoisier, R.; Acosta, O. Ensemble Learning for Prediction of Toxicity in Prostate Cancer Radiotherapy: Comparison between Stacking and Genetic Algorithm Weighted Voting. 2020; pp. 884-889.
651. Fontaine, P.; Riet, F.G.; Castelli, J.; Gnep, K.; Depeursinge, A.; Crevoisier, R.D.; Acosta, O. Comparison of feature selection in radiomics for the prediction of overall survival after radiotherapy for hepatocellular carcinoma. 2020; pp. 1667-1670.
652. Gao, X.Y.; Wang, Y.D.; Wu, S.M.; Rui, W.T.; Ma, D.N.; Duan, Y.; Zhang, A.N.; Yao, Z.W.; Yang, G.; Yu, Y.P. Differentiation of treatment-related effects from glioma recurrence using machine learning classifiers based upon pre-and post-contrast T1WI and T2 FLAIR subtraction features: A two-center study. *Cancer Management and Research* **2020**, *12*, 3191-3201, doi:10.2147/CMAR.S244262.
653. Guo, Y.; Jiang, W.; Lakshminarayanan, P.; Han, P.; Cheng, Z.; Bowers, M.; Hui, X.; Shpitser, I.; Siddiqui, S.; Taylor, R.H.; et al. Spatial Radiation Dose Influence on Xerostomia Recovery and Its Comparison to Acute Incidence in Patients With Head and Neck Cancer. *Advances in Radiation Oncology* **2020**, *5*, 221-230, doi:10.1016/j.adro.2019.08.009.
654. Han, L.; Shi, H.; Luo, Y.; Sun, W.; Li, S.; Zhang, N.; Jiang, X.; Gong, Y.; Xie, C. Gene signature based on B cell predicts clinical outcome of radiotherapy and immunotherapy for patients with lung adenocarcinoma. *Cancer Medicine* **2020**, *9*, 9581-9594, doi:10.1002/cam4.3561.
655. Hettal, L.; Stefani, A.; Salleron, J.; Courrech, F.; Behm-Ansmant, I.; Constans, J.M.; Gauchotte, G.; Vogin, G. Radiomics Method for the Differential Diagnosis of Radionecrosis Versus Progression after Fractionated Stereotactic Body Radiotherapy for Brain Oligometastasis. *Radiation Research* **2020**, *193*, 471-480, doi:10.1667/RR15517.1.
656. Howard, F.M.; Kochanny, S.; Koshy, M.; Spiotto, M.; Pearson, A.T. Machine Learning-Guided Adjuvant Treatment of Head and Neck Cancer. *JAMA Network Open* **2020**, *3*, doi:10.1001/jamanetworkopen.2020.25881.
657. Jaberipour, M.; Sahgal, A.; Soliman, H.; Sadeghi-Naini, A. Predicting Local Failure after Stereotactic Radiation Therapy in Brain Metastasis using Quantitative CT and Machine Learning(). *Annu Int Conf IEEE Eng Med Biol Soc* **2020**, *2020*, 1323-1326, doi:10.1109/embc44109.2020.9175746.
658. Jang, B.S.; Park, A.J.; Jeon, S.H.; Kim, I.H.; Lim, D.H.; Park, S.H.; Lee, J.H.; Chang, J.H.; Cho, K.H.; Kim, J.H.; et al. Machine learning model to predict pseudoprogression versus progression in glioblastoma using mri: A multi-institutional study (krog 18-07). *Cancers* **2020**, *12*, 1-14, doi:10.3390/cancers12092706.
659. Jones, S.; Hargrave, C.; Deegan, T.; Holt, T.; Mengersen, K. Comparison of statistical machine learning models for rectal protocol compliance in prostate external beam radiation therapy. *Medical Physics* **2020**, *47*, 1452-1459, doi:10.1002/mp.14044.
660. Kashef, A.; Khatibi, T.; Mehrvar, A. Prediction of Cranial Radiotherapy Treatment in Pediatric Acute Lymphoblastic Leukemia Patients Using Machine Learning: A Case Study at MAHAK Hospital. *Asian Pacific journal of cancer prevention : APJCP* **2020**, *21*, 3211-3219, doi:10.31557/APJCP.2020.21.11.3211.
661. Keek, S.; Sanduleanu, S.; Wesseling, F.; De Roest, R.; Van Den Brekel, M.; Van Der Heijden, M.; Vens, C.; Giuseppina, C.; Licitra, L.; Scheckenbach, K.; et al. Computed tomography-derived radiomic signature of head and neck squamous cell carcinoma (peri)tumoral tissue for the prediction of locoregional recurrence and distant metastasis after concurrent chemoradiotherapy. *PLoS ONE* **2020**, *15*, doi:10.1371/journal.pone.0232639.
662. Kowalchuk, R.O.; Waters, M.R.; Richardson, K.M.; Spencer, K.M.; Larner, J.M.; Kersh, C.R. A single-institutional experience with low dose stereotactic body radiation therapy for liver metastases. *Reports of Practical Oncology and Radiotherapy* **2020**, *25*, 987-993, doi:10.1016/j.rpor.2020.09.010.
663. Lee, S.H.; Han, P.; Hales, R.K.; Voong, K.R.; Noro, K.; Sugiyama, S.; Haller, J.W.; McNutt, T.R.; Lee, J. Multi-view radiomics and dosiomics analysis with machine learning for predicting acute-phase weight loss in lung cancer patients treated with radiotherapy. *Phys Med Biol* **2020**, *65*, 195015, doi:10.1088/1361-6560/ab8531.
664. Luna, J.M.; Chao, H.H.; Shinohara, R.T.; Ungar, L.H.; Cengel, K.A.; Pryma, D.A.; Chinniah, C.; Berman, A.T.; Katz, S.I.; Kontos, D.; et al. Machine learning highlights the deficiency of conventional dosimetric constraints for prevention of high-grade radiation esophagitis in non-small cell lung cancer treated with chemoradiation. *Clinical and Translational Radiation Oncology* **2020**, *22*, 69-75, doi:10.1016/j.ctro.2020.03.007.
665. Avanzo, M.; Pirrone, G.; Vinante, L.; Caroli, A.; Stancanello, J.; Drigo, A.; Massarut, S.; Mileto, M.; Urbani, M.; Trovo, M.; et al. Electron Density and Biologically Effective Dose (BED) Radiomics-Based Machine Learning Models to Predict Late Radiation-Induced Subcutaneous Fibrosis. *Front Oncol* **2020**, *10*, 490, doi:10.3389/fonc.2020.00490.
666. Niedzielski, J.S.; Wei, X.; Xu, T.; Gomez, D.R.; Liao, Z.; Bankson, J.A.; Lai, S.Y.; Court, L.E.; Yang, J. Development and application of an elastic net logistic regression model to investigate the impact of cardiac substructure dose on radiation-induced pericardial effusion in patients with NSCLC. *Acta Oncologica* **2020**, 1193-1200, doi:10.1080/0284186X.2020.1794034.

667. Pan, X.; Levin-Epstein, R.; Huang, J.; Ruan, D.; King, C.R.; Kishan, A.U.; Steinberg, M.L.; Qi, X.S. Dosimetric predictors of patient-reported toxicity after prostate stereotactic body radiotherapy: Analysis of full range of the dose-volume histogram using ensemble machine learning. *Radiotherapy and oncology : journal of the European Society for Therapeutic Radiology and Oncology* **2020**, *148*, 181–188, doi:10.1016/j.radonc.2020.04.013.
668. Pan, X.; Zhang, T.; Yang, Q.; Yang, D.; Rwigema, J.C.; Qi, X.S. Survival prediction for oral tongue cancer patients via probabilistic genetic algorithm optimized neural network models. *British Journal of Radiology* **2020**, *93*, doi:10.1259/bjr.20190825.
669. Pan, Z.Q.; Zhang, S.J.; Wang, X.L.; Jiao, Y.X.; Qiu, J.J. Machine learning based on a multiparametric and multiregional radiomics signature predicts radiotherapeutic response in patients with glioblastoma. *Behavioural Neurology* **2020**, *2020*, doi:10.1155/2020/1712604.
670. Qiu, X.; Gao, J.; Yang, J.; Hu, J.; Hu, W.; Kong, L.; Lu, J.J. A Comparison Study of Machine Learning (Random Survival Forest) and Classic Statistic (Cox Proportional Hazards) for Predicting Progression in High-Grade Glioma after Proton and Carbon Ion Radiotherapy. *Frontiers in Oncology* **2020**, *10*, doi:10.3389/fonc.2020.551420.
671. Shi, R.; Chen, W.; Yang, B.; Qu, J.; Cheng, Y.; Zhu, Z.; Gao, Y.; Wang, Q.; Liu, Y.; Li, Z.; et al. Prediction of KRAS, NRAS and BRAF status in colorectal cancer patients with liver metastasis using a deep artificial neural network based on radiomics and semantic features. *Am J Cancer Res* **2020**, *10*, 4513–4526.
672. Rattay, T.; Seibold, P.; Aguado-Barrera, M.E.; Altabas, M.; Azria, D.; Barnett, G.C.; Bultijnck, R.; Chang-Claude, J.; Choudhury, A.; Coles, C.E.; et al. External Validation of a Predictive Model for Acute Skin Radiation Toxicity in the REQUITE Breast Cohort. *Frontiers in Oncology* **2020**, *10*, doi:10.3389/fonc.2020.575909.
673. Ryu, S.M.; Seo, S.W.; Lee, S.H. Novel prognostication of patients with spinal and pelvic chondrosarcoma using deep survival neural networks. *BMC Medical Informatics and Decision Making* **2020**, *20*, doi:10.1186/s12911-019-1008-4.
674. Leger, S.; Zwanenburg, A.; Leger, K.; Lohaus, F.; Linge, A.; Schreiber, A.; Kalinauskaite, G.; Tinhofer, I.; Guberina, N.; Guberina, M.; et al. Comprehensive Analysis of Tumour Sub-Volumes for Radiomic Risk Modelling in Locally Advanced HNSCC. *Cancers (Basel)* **2020**, *12*, doi:10.3390/cancers12103047.
675. Purohit, S.; Zhi, W.; Ferris, D.G.; Alvarez, M.; Tran, L.K.H.; Tran, P.M.H.; Dun, B.; Hopkins, D.; Santos, B.D.; Ghamande, S.; et al. Senescence-Associated Secretory Phenotype Determines Survival and Therapeutic Response in Cervical Cancer. *Cancers (Basel)* **2020**, *12*, doi:10.3390/cancers12102899.
676. Saednia, K.; Tabbarah, S.; Lagree, A.; Wu, T.; Klein, J.; Garcia, E.; Hall, M.; Chow, E.; Rakovitch, E.; Childs, C.; et al. Quantitative Thermal Imaging Biomarkers to Detect Acute Skin Toxicity From Breast Radiation Therapy Using Supervised Machine Learning. *International Journal of Radiation Oncology Biology Physics* **2020**, *106*, 1071–1083, doi:10.1016/j.ijrobp.2019.12.032.
677. Sher, A.; Medavaram, S.; Nemesure, B.; Clouston, S.; Keresztes, R. Risk stratification of locally advanced non-small cell lung cancer (Nslc) patients treated with chemo-radiotherapy: An institutional analysis. *Cancer Management and Research* **2020**, *12*, 7165–7171, doi:10.2147/CMAR.S250868.
678. Smith, J.B.; Shew, M.; Karadaghy, O.A.; Nallani, R.; Sykes, K.J.; Gan, G.N.; Brant, J.A.; Bur, A.M. Predicting salvage laryngectomy in patients treated with primary nonsurgical therapy for laryngeal squamous cell carcinoma using machine learning. *Head and Neck* **2020**, *42*, 2330–2339, doi:10.1002/hed.26246.
679. Socarrás Fernández, J.A.; Mönnich, D.; Leibfarth, S.; Welz, S.; Zwanenburg, A.; Leger, S.; Löck, S.; Pfannenberger, C.; La Fougère, C.; Reischl, G.; et al. Comparison of patient stratification by computed tomography radiomics and hypoxia positron emission tomography in head-and-neck cancer radiotherapy. *Physics and Imaging in Radiation Oncology* **2020**, *15*, 52–59, doi:10.1016/j.phro.2020.07.003.
680. Takada, A.; Yokota, H.; Watanabe Nemoto, M.; Horikoshi, T.; Matsushima, J.; Uno, T. A multi-scanner study of MRI radiomics in uterine cervical cancer: prediction of in-field tumor control after definitive radiotherapy based on a machine learning method including peritumoral regions. *Japanese Journal of Radiology* **2020**, *38*, 265–273, doi:10.1007/s11604-019-00917-0.
681. Valle, L.F.; Ruan, D.; Dang, A.; Levin-Epstein, R.G.; Patel, A.P.; Weidhaas, J.B.; Nickols, N.G.; Lee, P.P.; Low, D.A.; Qi, X.S.; et al. Development and Validation of a Comprehensive Multivariate Dosimetric Model for Predicting Late Genitourinary Toxicity Following Prostate Cancer Stereotactic Body Radiotherapy. *Frontiers in Oncology* **2020**, *10*, doi:10.3389/fonc.2020.00786.
682. Tran, W.T.; Suraweera, H.; Quiaoit, K.; DiCenzo, D.; Fatima, K.; Jang, D.; Bhardwaj, D.; Kolios, C.; Karam, I.; Poon, I.; et al. Quantitative ultrasound delta-radiomics during radiotherapy for monitoring treatment responses in head and neck malignancies. *Future Sci OA* **2020**, *6*, Fso624, doi:10.2144/fsoa-2020-0073.

683. Wang, J.; Liu, R.; Zhao, Y.; Nantavithya, C.; Elhalawani, H.; Zhu, H.; Mohamed, A.S.R.; Fuller, C.D.; Kannarunimit, D.; Yang, P.; et al. A predictive model of radiation-related fibrosis based on the radiomic features of magnetic resonance imaging and computed tomography. *Translational Cancer Research* **2020**, *9*, 4726–4738, doi:10.21037/tcr-20-751.
684. Yan, M.; Wang, W. Radiomic Analysis of CT Predicts Tumor Response in Human Lung Cancer with Radiotherapy. *Journal of Digital Imaging* **2020**, *33*, 1401–1403, doi:10.1007/s10278-020-00385-3.
685. Avanzo, M.; Gagliardi, V.; Stancanella, J.; Blanck, O.; Pirrone, G.; El Naqa, I.; Revelant, A.; Sartor, G. Combining computed tomography and biologically effective dose in radiomics and deep learning improves prediction of tumor response to robotic lung stereotactic body radiation therapy. *Medical Physics* **2021**, *48*, 6257–6269, doi:10.1002/mp.15178.
686. Bin, L.; Yuan, T.; Zhaohui, S.; Wenting, R.; Zhiqiang, L.; Peng, H.; Shuying, Y.; Lei, D.; Jianyang, W.; Jingbo, W.; et al. A deep learning-based dual-omics prediction model for radiation pneumonitis. *Medical Physics* **2021**, *48*, 6247–6256, doi:10.1002/mp.15079.
687. Chen, L.; Dohopolski, M.; Zhou, Z.; Wang, K.; Wang, R.; Sher, D.; Wang, J. Attention Guided Lymph Node Malignancy Prediction in Head and Neck Cancer. *International Journal of Radiation Oncology Biology Physics* **2021**, *110*, 1171–1179, doi:10.1016/j.ijrobp.2021.02.004.
688. Cui, S.; Ten Haken, R.K.; El Naqa, I. Integrating Multiomics Information in Deep Learning Architectures for Joint Actuarial Outcome Prediction in Non-Small Cell Lung Cancer Patients After Radiation Therapy. *International Journal of Radiation Oncology Biology Physics* **2021**, *110*, 893–904, doi:10.1016/j.ijrobp.2021.01.042.
689. Fontaine, P.; Andrearczyk, V.; Oreiller, V.; Castelli, J.; Jreige, M.; Prior, J.O.; Depeursinge, A. Fully Automatic Head and Neck Cancer Prognosis Prediction in PET/CT. **2021**, *13050 LNCS*, 59–68, doi:10.1007/978-3-030-89847-2\_6.
690. Gal, R.; Van Velzen, S.G.M.; Hoening, M.J.; Emaus, M.J.; Van Der Leij, F.; Gregorowitsch, M.L.; Blezer, E.L.A.; Gernaat, S.A.M.; Lessmann, N.; Sattler, M.G.A.; et al. Identification of Risk of Cardiovascular Disease by Automatic Quantification of Coronary Artery Calcifications on Radiotherapy Planning CT Scans in Patients with Breast Cancer. *JAMA Oncology* **2021**, *7*, 1024–1032, doi:10.1001/jamaoncol.2021.1144.
691. Gao, Y.; Ghodrati, V.; Kalbasi, A.; Fu, J.; Ruan, D.; Cao, M.; Wang, C.; Eilber, F.C.; Bernthal, N.; Bukata, S.; et al. Prediction of soft tissue sarcoma response to radiotherapy using longitudinal diffusion MRI and a deep neural network with generative adversarial network-based data augmentation. *Medical Physics* **2021**, *48*, 3262–3372, doi:10.1002/mp.14897.
692. Jang, B.S.; Song, C.; Kang, S.B.; Kim, J.S. Radiogenomic and deep learning network approaches to predict kras mutation from radiotherapy plan ct. *Anticancer Research* **2021**, *41*, 3969–3976, doi:10.21873/anticancer.15193.
693. Jenkins, A.; Mullen, T.S.; Johnson-Hart, C.; Green, A.; McWilliam, A.; Aznar, M.; van Herk, M.; Vasquez Osorio, E. Novel methodology to assess the effect of contouring variation on treatment outcome. *Medical Physics* **2021**, *48*, 3234–3242, doi:10.1002/mp.14865.
694. Kim, H.; Lee, J.H.; Kim, H.J.; Park, C.M.; Wu, H.G.; Goo, J.M. Extended application of a CT-based artificial intelligence prognostication model in patients with primary lung cancer undergoing stereotactic ablative radiotherapy. *Radiother Oncol* **2021**, *165*, 166–173, doi:10.1016/j.radonc.2021.10.022.
695. Li, X.; Gao, H.; Zhu, J.; Huang, Y.; Zhu, Y.; Huang, W.; Li, Z.; Sun, K.; Liu, Z.; Tian, J.; et al. 3D Deep Learning Model for the Pretreatment Evaluation of Treatment Response in Esophageal Carcinoma: A Prospective Study (ChiCTR2000039279). *International Journal of Radiation Oncology Biology Physics* **2021**, *111*, 926–935, doi:10.1016/j.ijrobp.2021.06.033.
696. Moradmand, H.; Aghamiri, S.M.R.; Ghaderi, R.; Emami, H. The role of deep learning-based survival model in improving survival prediction of patients with glioblastoma. *Cancer Medicine* **2021**, *10*, 7048–7059, doi:10.1002/cam4.4230.
697. Fh, T.; Cyw, C.; Eyw, C. Radiomics AI prediction for head and neck squamous cell carcinoma (HNSCC) prognosis and recurrence with target volume approach. *BJR Open* **2021**, *3*, 20200073, doi:10.1259/bjro.20200073.
698. Wei, L.; Owen, D.; Rosen, B.; Guo, X.; Cuneo, K.; Lawrence, T.S.; Ten Haken, R.; El Naqa, I. A deep survival interpretable radiomics model of hepatocellular carcinoma patients. *Physica Medica* **2021**, *82*, 295–305, doi:10.1016/j.ejmp.2021.02.013.

699. Jiao, Z.; Li, H.; Xiao, Y.; Dorsey, J.; Simone, C.B.; Feigenberg, S.; Kao, G.; Fan, Y. Integration of Deep Learning Radiomics and Counts of Circulating Tumor Cells Improves Prediction of Outcomes of Early Stage NSCLC Patients Treated With Stereotactic Body Radiation Therapy. *Int J Radiat Oncol Biol Phys* **2022**, *112*, 1045-1054, doi:10.1016/j.ijrobp.2021.11.006.
700. Zhao, Y.; Xu, J.; Chen, Q. Analysis of Curative Effect and Prognostic Factors of Radiotherapy for Esophageal Cancer Based on the CNN. *Journal of Healthcare Engineering* **2021**, *2021*, doi:10.1155/2021/9350677.
701. Haga, A.; Takahashi, W.; Aoki, S.; Nawa, K.; Yamashita, H.; Abe, O.; Nakagawa, K. Classification of early stage non-small cell lung cancers on computed tomographic images into histological types using radiomic features: interobserver delineation variability analysis. *Radiol Phys Technol* **2018**, *11*, 27-35, doi:10.1007/s12194-017-0433-2.
702. Alabi, R.O.; Mäkitie, A.A.; Pirinen, M.; Elmusrati, M.; Leivo, I.; Almangush, A. Comparison of nomogram with machine learning techniques for prediction of overall survival in patients with tongue cancer. *International Journal of Medical Informatics* **2021**, *145*, doi:10.1016/j.ijmedinf.2020.104313.
703. Aldrainli, M.; Soria, D.; Grishchuck, D.; Ingram, S.; Lyon, R.; Mistry, A.; Oliveira, J.; Samuel, R.; Shelley, L.E.A.; Osman, S.; et al. A data science approach for early-stage prediction of Patient's susceptibility to acute side effects of advanced radiotherapy. *Computers in Biology and Medicine* **2021**, *135*, doi:10.1016/j.compbimed.2021.104624.
704. Amiri, S.; Akbarabadi, M.; Abdolali, F.; Nikoofar, A.; Esfahani, A.J.; Cheraghi, S. Radiomics analysis on CT images for prediction of radiation-induced kidney damage by machine learning models. *Computers in Biology and Medicine* **2021**, *133*, doi:10.1016/j.compbimed.2021.104409.
705. Gui, C.; Chen, X.; Sheikh, K.; Mathews, L.; Lo, S.L.; Lee, J.; Khan, M.A.; Sciubba, D.M.; Redmond, K.J. Radiomic modeling to predict risk of vertebral compression fracture after stereotactic body radiation therapy for spinal metastases. *J Neurosurg Spine* **2021**, *1-9*, doi:10.3171/2021.3.Spine201534.
706. Puttanawarut, C.; Sirirutbunkajorn, N.; Khachonkham, S.; Pattaranutaporn, P.; Wongsawat, Y. Biological dosiomic features for the prediction of radiation pneumonitis in esophageal cancer patients. *Radiat Oncol* **2021**, *16*, 220, doi:10.1186/s13014-021-01950-y.
707. Cao, Y.; Mukhopadhyay, N.D. Statistical Modeling of Longitudinal Data with Non-Ignorable Non-Monotone Missingness with Semiparametric Bayesian and Machine Learning Components. *Sankhya B* **2021**, *83*, 152-169, doi:10.1007/s13571-019-00222-w.
708. Chang, C.Y.; Lu, Y.C.A.; Ting, W.C.; Shen, T.W.D.; Peng, W.C. An artificial immune system with bootstrap sampling for the diagnosis of recurrent endometrial cancers. *Open Medicine (Poland)* **2021**, *16*, 237-245, doi:10.1515/med-2021-0226.
709. Chang, H.C.; Dai, Y.H.; Shen, P.C.; Chang, W.C.; Lo, C.H.; Yang, J.F.; Lin, C.S.; Chao, H.L.; Tu, S.J.; Huang, W.Y.; et al. Using computed tomography-based radiomics to predict outcomes for hepatocellular carcinoma patients receiving stereotactic body radiotherapy. *Therapeutic Radiology and Oncology* **2021**, *5*, doi:10.21037/TRO-21-8.
710. Chen, H.; Li, C.; Zheng, L.; Lu, W.; Li, Y.; Wei, Q. A machine learning-based survival prediction model of high grade glioma by integration of clinical and dose-volume histogram parameters. *Cancer Medicine* **2021**, *10*, 2774-2786, doi:10.1002/cam4.3838.
711. Chen, X.; Sheikh, K.; Nakajima, E.; Lin, C.T.; Lee, J.; Hu, C.; Hales, R.K.; Forde, P.M.; Naidoo, J.; Voong, K.R. Radiation Versus Immune Checkpoint Inhibitor Associated Pneumonitis: Distinct Radiologic Morphologies. *Oncologist* **2021**, *26*, e1822-e1832, doi:10.1002/onco.13900.
712. Cheung, B.M.F.; Lau, K.S.; Lee, V.H.F.; Leung, T.W.; Kong, F.M.S.; Luk, M.Y.; Yuen, K.K. Computed tomography-based radiomic model predicts radiological response following stereotactic body radiation therapy in early-stage non-small-cell lung cancer and pulmonary oligo-metastases. *Radiation Oncology Journal* **2021**, *39*, 254-264, doi:10.3857/roj.2021.00311.
713. Choudhury, A.; Theophanous, S.; Lønne, P.I.; Samuel, R.; Guren, M.G.; Berbee, M.; Brown, P.; Lilley, J.; van Soest, J.; Dekker, A.; et al. Predicting outcomes in anal cancer patients using multi-centre data and distributed learning - A proof-of-concept study. *Radiother Oncol* **2021**, *159*, 183-189, doi:10.1016/j.radonc.2021.03.013.
714. Conroy, L.; Khalifa, A.; Berlin, A.; McIntosh, C.; Purdie, T.G. Performance stability evaluation of atlas-based machine learning radiation therapy treatment planning in prostate cancer. *Physics in Medicine and Biology* **2021**, *66*, doi:10.1088/1361-6560/abfff0.
715. Bitterman, D.S.; Selesnick, P.; Bredfeldt, J.; Williams, C.L.; Guthier, C.; Huynh, E.; Kozono, D.E.; Lewis, J.H.; Cormack, R.A.; Carpenter, C.M.; et al. Dosimetric Planning Tradeoffs to Reduce Heart Dose Using Machine Learning-Guided Decision Support Software in Patients with Lung Cancer. *Int J Radiat Oncol Biol Phys* **2022**, *112*, 996-1003, doi:10.1016/j.ijrobp.2021.11.009.

716. Dasgupta, A.; Fatima, K.; DiCenzo, D.; Bhardwaj, D.; Quiaoit, K.; Saifuddin, M.; Karam, I.; Poon, I.; Husain, Z.; Tran, W.T.; et al. Quantitative ultrasound radiomics in predicting recurrence for patients with node-positive head-neck squamous cell carcinoma treated with radical radiotherapy. *Cancer Medicine* **2021**, *10*, 2579–2589, doi:10.1002/cam4.3634.
717. De Felice, F.; Valentini, V.; De Vincentiis, M.; Di Gioia, C.R.T.; Musio, D.; Tummulo, A.A.; Ricci, L.I.; Converti, V.; Mezi, S.; Messineo, D.; et al. Prediction of recurrence by machine learning in salivary gland cancer patients after adjuvant (chemo) radiotherapy. *In Vivo* **2021**, *35*, 3355–3360, doi:10.21873/invivo.12633.
718. de Marco Borges, P.H.; Lizar, J.C.; Faustino, A.C.C.; Arruda, G.V.; Pavoni, J.F. Kurtosis is An MRI Radiomics Feature Predictor of Poor Prognosis in Patients with GBM. *Brazilian Journal of Physics* **2021**, *51*, 1035–1042, doi:10.1007/s13538-021-00912-9.
719. Delli Pizzi, A.; Chiarelli, A.M.; Chiacchiaretta, P.; d’Annibale, M.; Croce, P.; Rosa, C.; Mastrodicasa, D.; Trebeschi, S.; Lambregts, D.M.J.; Caposiena, D.; et al. MRI-based clinical-radiomics model predicts tumor response before treatment in locally advanced rectal cancer. *Scientific Reports* **2021**, *11*, doi:10.1038/s41598-021-84816-3.
720. Deng, F.; Zhou, H.; Lin, Y.; Heim, J.A.; Shen, L.; Li, Y.; Zhang, L. Predict multicategory causes of death in lung cancer patients using clinicopathologic factors. *Computers in Biology and Medicine* **2021**, *129*, doi:10.1016/j.compbimed.2020.104161.
721. Devakumar, D.; Sunny, G.; Sasidharan, B.K.; Bowen, S.R.; Nadaraj, A.; Jeyseelan, L.; Mathew, M.; Irodi, A.; Isiah, R.; Pavamani, S.; et al. Framework for Machine Learning of CT and PET Radiomics to Predict Local Failure after Radiotherapy in Locally Advanced Head and Neck Cancers. *J Med Phys* **2021**, *46*, 181–188, doi:10.4103/jmp.JMP\_6\_21.
722. Diao, P.; Jiang, Y.; Li, Y.; Wu, X.; Li, J.; Zhou, C.; Jiang, L.; Zhang, W.; Yan, E.; Zhang, P.; et al. Immune landscape and subtypes in primary resectable oral squamous cell carcinoma: Prognostic significance and predictive of therapeutic response. *Journal for ImmunoTherapy of Cancer* **2021**, *9*, doi:10.1136/jitc-2021-002434.
723. Elledge, C.R.; LaVigne, A.W.; Fiksel, J.; Wright, J.L.; McNutt, T.; Kleinberg, L.R.; Hu, C.; Smith, T.J.; Zeger, S.; DeWeese, T.L.; et al. External Validation of the Bone Metastases Ensemble Trees for Survival (BMETS) Machine Learning Model to Predict Survival in Patients With Symptomatic Bone Metastases. *JCO clinical cancer informatics* **2021**, *5*, 304–314, doi:10.1200/CCI.20.00128.
724. Moro, F.; Albanese, M.; Boldrini, L.; Chiappa, V.; Lenkiewicz, J.; Bertolina, F.; Mascilini, F.; Moroni, R.; Gambacorta, M.A.; Raspagliesi, F.; et al. Developing and validating ultrasound-based radiomics models for predicting high-risk endometrial cancer. *Ultrasound Obstet Gynecol* **2021**, doi:10.1002/uog.24805.
725. Fatima, K.; Dasgupta, A.; DiCenzo, D.; Kolios, C.; Quiaoit, K.; Saifuddin, M.; Sandhu, M.; Bhardwaj, D.; Karam, I.; Poon, I.; et al. Ultrasound delta-radiomics during radiotherapy to predict recurrence in patients with head and neck squamous cell carcinoma. *Clinical and Translational Radiation Oncology* **2021**, *28*, 62–70, doi:10.1016/j.ctro.2021.03.002.
726. Gensheimer, M.F.; Aggarwal, S.; Benson, K.R.K.; Carter, J.N.; Henry, A.S.; Wood, D.J.; Soltys, S.G.; Hancock, S.; Pollom, E.; Shah, N.H.; et al. Automated model versus treating physician for predicting survival time of patients with metastatic cancer. *Journal of the American Medical Informatics Association : JAMIA* **2021**, *28*, 1108–1116, doi:10.1093/jamia/ocaa290.
727. Giraud, P.; Giraud, P.; Nicolas, E.; Boisselier, P.; Alfonsi, M.; Rives, M.; Bardet, E.; Calugaru, V.; Noel, G.; Chajon, E.; et al. Interpretable Machine Learning Model for Locoregional Relapse Prediction in Oropharyngeal Cancers. *Cancers (Basel)* **2020**, *13*, doi:10.3390/cancers13010057.
728. Gutsche, R.; Lohmann, P.; Hoevels, M.; Ruess, D.; Galldiks, N.; Visser-Vandewalle, V.; Treuer, H.; Ruge, M.; Kocher, M. Radiomics outperforms semantic features for prediction of response to stereotactic radiosurgery in brain metastases. *Radiother Oncol* **2021**, *166*, 37–43, doi:10.1016/j.radonc.2021.11.010.
729. Ji, H.; Zhao, H.; Jin, J.; Liu, Z.; Gao, X.; Wang, F.; Dong, J.; Yan, X.; Zhang, J.; Wang, N.; et al. Novel Immune-Related Gene-Based Signature Characterizing an Inflamed Microenvironment Predicts Prognosis and Radiotherapy Efficacy in Glioblastoma. *Front Genet* **2021**, *12*, 736187, doi:10.3389/fgene.2021.736187.
730. Zhang, H.; Wang, W.; Pi, W.; Bi, N.; DesRosiers, C.; Kong, F.; Cheng, M.; Yang, L.; Lautenschlaeger, T.; Jolly, S.; et al. Genetic Variations in the Transforming Growth Factor- $\beta$ 1 Pathway May Improve Predictive Power for Overall Survival in Non-small Cell Lung Cancer. *Front Oncol* **2021**, *11*, 599719, doi:10.3389/fonc.2021.599719.
731. Haider, S.P.; Sharaf, K.; Zeevi, T.; Baumeister, P.; Reichel, C.; Forghani, R.; Kann, B.H.; Petukhova, A.; Judson, B.L.; Prasad, M.L.; et al. Prediction of post-radiotherapy locoregional progression in HPV-associated oropharyngeal squamous cell carcinoma using machine-learning analysis of baseline PET/CT radiomics. *Translational Oncology* **2021**, *14*, doi:10.1016/j.tranon.2020.100906.

732. Han, P.; Lee, S.H.; Noro, K.; Haller, J.W.; Nakatsugawa, M.; Sugiyama, S.; Bowers, M.; Lakshminarayanan, P.; Hoff, J.; Friedes, C.; et al. Improving Early Identification of Significant Weight Loss Using Clinical Decision Support System in Lung Cancer Radiation Therapy. *JCO clinical cancer informatics* **2021**, *5*, 944–952, doi:10.1200/CCI.20.00189.
733. Hu, L.; Ji, J.; Li, F. Estimating heterogeneous survival treatment effect in observational data using machine learning. *Statistics in Medicine* **2021**, *40*, 4691–4713, doi:10.1002/sim.9090.
734. Humbert-Vidan, L.; Patel, V.; Oksuz, I.; King, A.P.; Urbano, T.G. Comparison of machine learning methods for prediction of osteoradionecrosis incidence in patients with head and neck cancer. *British Journal of Radiology* **2021**, *94*, doi:10.1259/bjr.20200026.
735. Peeken, J.C.; Asadpour, R.; Specht, K.; Chen, E.Y.; Klymenko, O.; Akinkuoroye, V.; Hippe, D.S.; Spraker, M.B.; Schaub, S.K.; Dapper, H.; et al. MRI-based delta-radiomics predicts pathologic complete response in high-grade soft-tissue sarcoma patients treated with neoadjuvant therapy. *Radiother Oncol* **2021**, *164*, 73–82, doi:10.1016/j.radonc.2021.08.023.
736. Jaberipour, M.; Soliman, H.; Sahgal, A.; Sadeghi-Naini, A. A priori prediction of local failure in brain metastasis after hypo-fractionated stereotactic radiotherapy using quantitative MRI and machine learning. *Scientific Reports* **2021**, *11*, doi:10.1038/s41598-021-01024-9.
737. Jones, H.J.S.; Cunningham, C.; Askautrud, H.A.; Danielsen, H.E.; Kerr, D.J.; Domingo, E.; Maughan, T.; Leedham, S.J.; Koelzer, V.H. Stromal composition predicts recurrence of early rectal cancer after local excision. *Histopathology* **2021**, *79*, 947–956, doi:10.1111/his.14438.
738. Lafata, K.J.; Chang, Y.; Wang, C.; Mowery, Y.M.; Vergalasova, I.; Niedzwiecki, D.; Yoo, D.S.; Liu, J.G.; Brizel, D.M.; Yin, F.F. Intrinsic radiomic expression patterns after 20 Gy demonstrate early metabolic response of oropharyngeal cancers. *Med Phys* **2021**, *48*, 3767–3777, doi:10.1002/mp.14926.
739. Syed, K.; Sleeman, W.; Soni, P.; Hagan, M.; Palta, J.; Kapoor, R.; Ghosh, P. Machine-Learning Models for Multicenter Prostate Cancer Treatment Plans. *J Comput Biol* **2021**, *28*, 166–184, doi:10.1089/cmb.2020.0188.
740. Zhao, L.M.; Kang, Y.F.; Gao, J.M.; Li, L.; Chen, R.T.; Zeng, J.J.; Zhang, Y.M.; Liao, W. Functional Connectivity Density for Radiation Encephalopathy Prediction in Nasopharyngeal Carcinoma. *Front Oncol* **2021**, *11*, 687127, doi:10.3389/fonc.2021.687127.
741. Wei, L.; Huang, Y.; Chen, Z.; Li, J.; Huang, G.; Qin, X.; Cui, L.; Zhuo, Y. A Novel Machine Learning Algorithm Combined With Multivariate Analysis for the Prognosis of Renal Collecting Duct Carcinoma. *Front Oncol* **2021**, *11*, 777735, doi:10.3389/fonc.2021.777735.
742. Lee, C.H.; Kang, C.L.; Tseng, C.D.; Chou, C.M.; Shieh, C.S.; Lin, C.H.; Tsai, I.H.; Li, B.S.; Ren, J.H.; Chao, P.J.; et al. Photographic image processing to predict radiation dermatitis in breast cancer patients using machine learning algorithms. *International Journal of Modern Physics B* **2021**, *35*, doi:10.1142/S0217979221400221.
743. Luxton, J.J.; McKenna, M.J.; Lewis, A.M.; Taylor, L.E.; Jhavar, S.G.; Swanson, G.P.; Bailey, S.M. Telomere length dynamics and chromosomal instability for predicting individual radiosensitivity and risk via machine learning. *Journal of Personalized Medicine* **2021**, *11*, doi:10.3390/jpm11030188.
744. Akcay, M.; Etiz, D.; Celik, O.; Ozen, A. Evaluation of acute hematological toxicity by machine learning in gynecologic cancers using postoperative radiotherapy. *Indian J Cancer* **2021**, doi:10.4103/ijc.IJC\_666\_19.
745. Manem, V.S.K. Development and validation of genomic predictors of radiation sensitivity using preclinical data. *BMC Cancer* **2021**, *21*, doi:10.1186/s12885-021-08652-4.
746. Morgado, J.; Pereira, T.; Silva, F.; Freitas, C.; Negrão, E.; de Lima, B.F.; da Silva, M.C.; Madureira, A.J.; Ramos, I.; Hespanhol, V.; et al. Machine learning and feature selection methods for egfr mutation status prediction in lung cancer. *Applied Sciences (Switzerland)* **2021**, *11*, doi:10.3390/app11073273.
747. Morgan, H.E.; Wang, K.; Dohopolski, M.; Liang, X.; Folkert, M.R.; Sher, D.J.; Wang, J. Exploratory ensemble interpretable model for predicting local failure in head and neck cancer: The additive benefit of CT and intra-treatment cone-beam computed tomography features. *Quantitative Imaging in Medicine and Surgery* **2021**, *11*, 4781–4796, doi:10.21037/qims-21-274.
748. Giraud, N.; Saut, O.; Aparicio, T.; Ronchin, P.; Bazire, L.A.; Barbier, E.; Lemanski, C.; Mirabel, X.; Etienne, P.L.; Lièvre, A.; et al. MRI-Based Radiomics Input for Prediction of 2-Year Disease Recurrence in Anal Squamous Cell Carcinoma. *Cancers (Basel)* **2021**, *13*, doi:10.3390/cancers13020193.
749. Nieder, C.; Mannsåker, B.; Yobuta, R. Independent validation of a comprehensive machine learning approach predicting survival after radiotherapy for bone metastases. *Anticancer Research* **2021**, *41*, 1471–1474, doi:10.21873/anticancer.14905.

750. Oei, R.W.; Lyu, Y.; Ye, L.; Kong, F.; Du, C.; Zhai, R.; Xu, T.; Shen, C.; He, X.; Kong, L.; et al. Progression-free survival prediction in patients with nasopharyngeal carcinoma after intensity-modulated radiotherapy: Machine learning vs. traditional statistics. *Journal of Personalized Medicine* **2021**, *11*, doi:10.3390/jpm11080787.
751. Osapoetra, L.O.; Dasgupta, A.; DiCenzo, D.; Fatima, K.; Quiaioit, K.; Saifuddin, M.; Karam, I.; Poon, I.; Husain, Z.; Tran, W.T.; et al. Assessment of clinical radiosensitivity in patients with head-neck squamous cell carcinoma from pre-treatment quantitative ultrasound radiomics. *Scientific Reports* **2021**, *11*, doi:10.1038/s41598-021-85221-6.
752. Pardo-Montero, J.; Parga-Pazos, M.; Fenwick, J.D. Classification of tolerable/intolerable mucosal toxicity of head-and-neck radiotherapy schedules with a biomathematical model of cell dynamics. *Medical Physics* **2021**, *48*, 4075-4084, doi:10.1002/mp.14834.
753. Ren, W.; Liang, B.; Sun, C.; Wu, R.; Men, K.; Xu, Y.; Han, F.; Yi, J.; Qu, Y.; Dai, J. Dosiomics-based prediction of radiation-induced hypothyroidism in nasopharyngeal carcinoma patients. *Physica Medica* **2021**, *89*, 219-225, doi:10.1016/j.ejmp.2021.08.009.
754. Pang, S.; Field, M.; Dowling, J.; Vinod, S.; Holloway, L.; Sowmya, A. Training radiomics-based CNNs for clinical outcome prediction: Challenges, strategies and findings. *Artif Intell Med* **2022**, *123*, 102230, doi:10.1016/j.artmed.2021.102230.
755. Shi, H.; Han, L.; Zhao, J.; Wang, K.; Xu, M.; Shi, J.; Dong, Z. Tumor stemness and immune infiltration synergistically predict response of radiotherapy or immunotherapy and relapse in lung adenocarcinoma. *Cancer Medicine* **2021**, *10*, 8944-8960, doi:10.1002/cam4.4377.
756. Siciarz, P.; Alfaifi, S.; Uytven, E.V.; Rathod, S.; Koul, R.; McCurdy, B. Machine learning for dose-volume histogram based clinical decision-making support system in radiation therapy plans for brain tumors. *Clinical and Translational Radiation Oncology* **2021**, *31*, 50-57, doi:10.1016/j.ctro.2021.09.001.
757. Sulicka-Grodzicka, J.; Surdacki, A.; Seweryn, M.; Mikołajczyk, T.; Rewiuk, K.; Guzik, T.; Grodzicki, T. Low-grade chronic inflammation and immune alterations in childhood and adolescent cancer survivors: A contribution to accelerated aging? *Cancer Medicine* **2021**, *10*, 1772-1782, doi:10.1002/cam4.3788.
758. Adachi, T.; Nakamura, M.; Shintani, T.; Mitsuyoshi, T.; Kakino, R.; Ogata, T.; Ono, T.; Tanabe, H.; Kokubo, M.; Sakamoto, T.; et al. Multi-institutional dose-segmented dosiomic analysis for predicting radiation pneumonitis after lung stereotactic body radiation therapy. *Med Phys* **2021**, *48*, 1781-1791, doi:10.1002/mp.14769.
759. Tunthanathip, T.; Oearsakul, T.; Tunthanathip, T. Machine Learning Approaches for Prognostication of Newly Diagnosed Glioblastoma. *International Journal of Nutrition, Pharmacology, Neurological Diseases* **2021**, *11*, 57-63, doi:10.4103/ijnpn.ijnpn-93-20.
760. Ursino, S.; Giuliano, A.; Martino, F.D.; Cocuzza, P.; Molinari, A.; Stefanelli, A.; Giusti, P.; Aringhieri, G.; Morganti, R.; Neri, E.; et al. Incorporating dose-volume histogram parameters of swallowing organs at risk in a videofluoroscopy-based predictive model of radiation-induced dysphagia after head and neck cancer intensity-modulated radiation therapy. *Strahlentherapie und Onkologie* **2021**, *197*, 209-218, doi:10.1007/s00066-020-01697-7.
761. Li, W.; Wang, T.; Zhang, X.; Zhu, J.; Li, X.Y.; Peng, F.; Dai, J.; Wang, J.; Zhang, L.; Wang, Y.; et al. Distinct lipid profiles of radiation-induced carotid plaques from atherosclerotic carotid plaques revealed by UPLC-QTOF-MS and DESI-MSI. *Radiother Oncol* **2021**, *167*, 25-33, doi:10.1016/j.radonc.2021.12.006.
762. Wen, D.W.; Lin, L.; Mao, Y.P.; Chen, C.Y.; Chen, F.P.; Wu, C.F.; Huang, X.D.; Li, Z.X.; Xu, S.S.; Kou, J.; et al. Normal tissue complication probability (NTCP) models for predicting temporal lobe injury after intensity-modulated radiotherapy in nasopharyngeal carcinoma: A large registry-based retrospective study from China. *Radiotherapy and Oncology* **2021**, *157*, 99-105, doi:10.1016/j.radonc.2021.01.008.
763. Zhang, Y.M.; Kang, Y.F.; Zeng, J.J.; Li, L.; Gao, J.M.; Liu, L.Z.; Shi, L.R.; Liao, W.H. Surface-Based Falff: A Potential Novel Biomarker for Prediction of Radiation Encephalopathy in Patients With Nasopharyngeal Carcinoma. *Front Neurosci* **2021**, *15*, 692575, doi:10.3389/fnins.2021.692575.
764. Yakar, M.; Etiz, D.; Badak, B.; Çelik, Ö.; Kütri, D.; Özen, A.; Yilmaz, E. Prediction of response to neoadjuvant chemoradiotherapy with machine learning in rectal cancer: A pilot study. *Türk Onkoloji Dergisi* **2021**, *36*, 459-467, doi:10.5505/tjo.2021.2843.
765. Yakar, M.; Etiz, D.; Metintas, M.; Ak, G.; Celik, O. Prediction of Radiation Pneumonitis With Machine Learning in Stage III Lung Cancer: A Pilot Study. *Technology in Cancer Research and Treatment* **2021**, *20*, 1-10, doi:10.1177/15330338211016373.
766. Yakar, M.; Etiz, D.; Yilmaz, Ş.; Çelik, Ö.; Ak, G.; Metintaş, M. Prediction of survival and progression-free survival using machine learning in stage iii lung cancer: A pilot study. *Türk Onkoloji Dergisi* **2021**, *36*, 446-458, doi:10.5505/tjo.2021.2788.
767. Yu, H.; Lam, K.O.; Wu, H.; Green, M.; Wang, W.; Jin, J.Y.; Hu, C.; Jolly, S.; Wang, Y.; Kong, F.M.S. Weighted-Support Vector Machine Learning Classifier of Circulating Cytokine Biomarkers to Predict Radiation-Induced Lung Fibrosis in Non-Small-Cell Lung Cancer Patients. *Frontiers in Oncology* **2021**, *10*, doi:10.3389/fonc.2020.601979.

768. Zhong, J.; Frood, R.; Brown, P.; Nelstrop, H.; Prestwich, R.; McDermott, G.; Currie, S.; Vaidyanathan, S.; Scarsbrook, A.F. Machine learning-based FDG PET-CT radiomics for outcome prediction in larynx and hypopharynx squamous cell carcinoma. *Clinical Radiology* **2021**, *76*, 78.e79-78.e17, doi:10.1016/j.crad.2020.08.030.
769. Zhu, C.; Huang, H.; Liu, X.; Chen, H.; Jiang, H.; Liao, C.; Pang, Q.; Dang, J.; Liu, P.; Lu, H. A Clinical-Radiomics Nomogram Based on Computed Tomography for Predicting Risk of Local Recurrence After Radiotherapy in Nasopharyngeal Carcinoma. *Frontiers in Oncology* **2021**, *11*, doi:10.3389/fonc.2021.637687.
770. Zhu, C.; Mohan, R.; Lin, S.H.; Jun, G.; Yaseen, A.; Jiang, X.; Wang, Q.; Cao, W.; Hobbs, B.P. Identifying Individualized Risk Profiles for Radiotherapy-Induced Lymphopenia Among Patients With Esophageal Cancer Using Machine Learning. *JCO clinical cancer informatics* **2021**, *5*, 1044-1053, doi:10.1200/CCI.21.00098.
771. Bandaragoda, T.; Ranasinghe, W.; Adikari, A.; de Silva, D.; Lawrentschuk, N.; Alahakoon, D.; Persad, R.; Bolton, D. The Patient-Reported Information Multidimensional Exploration (PRIME) Framework for Investigating Emotions and Other Factors of Prostate Cancer Patients with Low Intermediate Risk Based on Online Cancer Support Group Discussions. *Annals of Surgical Oncology* **2018**, *25*, 1737-1745, doi:10.1245/s10434-018-6372-2.
772. Auffenberg, G.B.; Ghani, K.R.; Ramani, S.; Usoro, E.; Denton, B.; Rogers, C.; Stockton, B.; Miller, D.C.; Singh, K. askMUSIC: Leveraging a Clinical Registry to Develop a New Machine Learning Model to Inform Patients of Prostate Cancer Treatments Chosen by Similar Men. *Eur Urol* **2019**, *75*, 901-907, doi:10.1016/j.eururo.2018.09.050.
773. Bourbonne, V.; Vallières, M.; Lucia, F.; Doucet, L.; Visvikis, D.; Tissot, V.; Pradier, O.; Hatt, M.; Schick, U. MRI-derived radiomics to guide post-operative management for high-risk prostate cancer. *Frontiers in Oncology* **2019**, *9*, doi:10.3389/fonc.2019.00807.
774. Shew, M.; New, J.; Bur, A.M. Machine Learning to Predict Delays in Adjuvant Radiation following Surgery for Head and Neck Cancer. *Otolaryngology - Head and Neck Surgery (United States)* **2019**, *160*, 1058-1064, doi:10.1177/0194599818823200.
775. Tang, G.; Yan, Y.; Shen, C.; Jia, X.; Zinn, M.; Trivedi, Z.; Yingling, A.; Westover, K.; Jiang, S. Development of a real-time indoor location system using bluetooth low energy technology and deep learning to facilitate clinical applications. *Med Phys* **2020**, *47*, 3277-3285, doi:10.1002/mp.14198.
776. Holbrook, M.D.; Blocker, S.J.; Mowery, Y.; Badea, A.; Qi, Y.; Kirsch, D.G.; Badea, C.T. MRI-based radiomics of sarcomas in the preclinical arm of a Co-clinical trial. 2020.
777. Kim, K.H.; Park, K.; Kim, H.; Jo, B.; Ahn, S.H.; Kim, C.; Kim, M.; Kim, T.H.; Lee, S.B.; Shin, D.; et al. Facial expression monitoring system for predicting patient's sudden movement during radiotherapy using deep learning. *Journal of Applied Clinical Medical Physics* **2020**, *21*, 191-199, doi:10.1002/acm2.12945.
778. Charteros, E.; Koutsopoulos, I. Edge computing for having an edge on cancer treatment: A mobile app for breast image analysis. 2020.
779. Hong, J.C.; Eclov, N.C.W.; Dalal, N.H.; Thomas, S.M.; Stephens, S.J.; Malicki, M.; Shields, S.; Cobb, A.; Mowery, Y.M.; Niedzwiecki, D.; et al. System for High-Intensity Evaluation during Radiation Therapy (SHIELD-RT): A Prospective Randomized Study of Machine Learning-Directed Clinical Evaluations during Radiation and Chemoradiation. *Journal of Clinical Oncology* **2020**, *38*, 3652-3661, doi:10.1200/JCO.20.01688.
780. Syed, K.; Sleeman, W.t.; Hagan, M.; Palta, J.; Kapoor, R.; Ghosh, P. Automatic Incident Triage in Radiation Oncology Incident Learning System. *Healthcare (Basel)* **2020**, *8*, doi:10.3390/healthcare8030272.
781. Wang, K.; Feng, C.; Li, M.; Pei, Q.; Li, Y.; Zhu, H.; Song, X.; Pei, H.; Tan, F. A bibliometric analysis of 23,492 publications on rectal cancer by machine learning: basic medical research is needed. *Therapeutic Advances in Gastroenterology* **2020**, *13*, doi:10.1177/1756284820934594.
782. Bose, P.; Sleeman, W.C.; Syed, K.; Hagan, M.; Palta, J.; Kapoor, R.; Ghosh, P. Deep neural network models to automate incident triage in the radiation oncology incident learning system. 2021.
783. Etminani-Ghasrodashti, R.; Kan, C.; Mozaffarian, L. Investigating the role of transportation barriers in cancer patients' decision making regarding the treatment process. *Transportation Research Record* **2021**, *2675*, 175-187, doi:10.1177/0361198121991497.
784. Men, K.; Boimel, P.; Janopaul-Naylor, J.; Cheng, C.; Zhong, H.; Huang, M.; Geng, H.; Fan, Y.; Plastaras, J.P.; Ben-Josef, E.; et al. A study of positioning orientation effect on segmentation accuracy using convolutional neural networks for rectal cancer. *J Appl Clin Med Phys* **2019**, *20*, 110-117, doi:10.1002/acm2.12494.
785. Mylonas, A.; Keall, P.J.; Booth, J.T.; Shieh, C.C.; Eade, T.; Poulsen, P.R.; Nguyen, D.T. A deep learning framework for automatic detection of arbitrarily shaped fiducial markers in intrafraction fluoroscopic images. *Medical Physics* **2019**, *46*, 2286-2297, doi:10.1002/mp.13519.
786. Zhao, W.; Shen, L.; Han, B.; Yang, Y.; Cheng, K.; Toesca, D.A.S.; Koong, A.C.; Chang, D.T.; Xing, L. Markerless Pancreatic Tumor Target Localization Enabled By Deep Learning. *International Journal of Radiation Oncology Biology Physics* **2019**, *105*, 432-439, doi:10.1016/j.ijrobp.2019.05.071.

787. Liu, C.; Liu, C.; Lv, F.; Zhong, K.; Yu, H. Breast cancer patient auto-setup using residual neural network for CT-guided therapy. *IEEE Access* **2020**, *8*, 201666–201674, doi:10.1109/ACCESS.2020.3035809.
788. Thomas, D.H.; Schubert, L.K.; Vinogradskiy, Y.; Nath, S.; Kavanagh, B.; Miften, M.; Jones, B. Technical Note: Deep Learning approach for automatic detection and identification of patient positioning devices for radiation therapy. *Medical Physics* **2020**, *47*, 5061–5069, doi:10.1002/mp.14338.
789. Tomori, S.; Kadoya, N.; Takayama, Y.; Kajikawa, T.; Shima, K.; Narazaki, K.; Jingu, K. A deep learning-based prediction model for gamma evaluation in patient-specific quality assurance. *Medical Physics* **2018**, *45*, 4055–4065, doi:10.1002/mp.13112.
790. Brown, W.E.; Sung, K.; Aleman, D.M.; Moreno-Centeno, E.; Purdie, T.G.; McIntosh, C.J. Guided undersampling classification for automated radiation therapy quality assurance of prostate cancer treatment. *Med Phys* **2018**, *45*, 1306–1316, doi:10.1002/mp.12757.
791. Nyflot, M.J.; Thammasorn, P.; Wootton, L.S.; Ford, E.C.; Chaovalitwongse, W.A. Deep learning for patient-specific quality assurance: Identifying errors in radiotherapy delivery by radiomic analysis of gamma images with convolutional neural networks. *Medical Physics* **2019**, *46*, 456–464, doi:10.1002/mp.13338.
792. El Naqa, I.; Irrer, J.; Ritter, T.A.; DeMarco, J.; Al-Hallaq, H.; Booth, J.; Kim, G.; Alkhatib, A.; Popple, R.; Perez, M.; et al. Machine learning for automated quality assurance in radiotherapy: A proof of principle using EPID data description. *Medical Physics* **2019**, *46*, 1914–1921, doi:10.1002/mp.13433.
793. Lam, D.; Zhang, X.; Li, H.; Deshan, Y.; Schott, B.; Zhao, T.; Zhang, W.; Mutic, S.; Sun, B. Predicting gamma passing rates for portal dosimetry-based IMRT QA using machine learning. *Medical Physics* **2019**, *46*, 4666–4675, doi:10.1002/mp.13752.
794. Fan, J.; Xing, L.; Ma, M.; Hu, W.; Yang, Y. Verification of the machine delivery parameters of a treatment plan via deep learning. *Physics in Medicine and Biology* **2020**, *65*, doi:10.1088/1361-6560/aba165.
795. Kimura, Y.; Kadoya, N.; Tomori, S.; Oku, Y.; Jingu, K. Error detection using a convolutional neural network with dose difference maps in patient-specific quality assurance for volumetric modulated arc therapy. *Phys Med* **2020**, *73*, 57–64, doi:10.1016/j.ejmp.2020.03.022.
796. Potter, N.J.; Mund, K.; Andreozzi, J.M.; Li, J.G.; Liu, C.; Yan, G. Error detection and classification in patient-specific IMRT QA with dual neural networks. *Med Phys* **2020**, *47*, 4711–4720, doi:10.1002/mp.14416.
797. Wall, P.D.H.; Fontenot, J.D. Application and comparison of machine learning models for predicting quality assurance outcomes in radiation therapy treatment planning. *Informatics in Medicine Unlocked* **2020**, *18*, doi:10.1016/j.imu.2020.100292.
798. Zhao, W.; Patil, I.; Han, B.; Yang, Y.; Xing, L.; Schüller, E. Beam data modeling of linear accelerators (linacs) through machine learning and its potential applications in fast and robust linac commissioning and quality assurance. *Radiotherapy and Oncology* **2020**, *153*, 122–129, doi:10.1016/j.radonc.2020.09.057.
799. Jia, M.; Yang, Y.; Wu, Y.; Li, X.; Xing, L.; Wang, L. Deep learning-augmented radioluminescence imaging for radiotherapy dose verification. *Medical Physics* **2021**, *48*, 6820–6831, doi:10.1002/mp.15229.
800. Kimura, Y.; Kadoya, N.; Oku, Y.; Kajikawa, T.; Tomori, S.; Jingu, K. Error detection model developed using a multi-task convolutional neural network in patient-specific quality assurance for volumetric-modulated arc therapy. *Medical Physics* **2021**, *48*, 4769–4783, doi:10.1002/mp.15031.
801. Tomori, S.; Kadoya, N.; Kajikawa, T.; Kimura, Y.; Narazaki, K.; Ochi, T.; Jingu, K. Systematic method for a deep learning-based prediction model for gamma evaluation in patient-specific quality assurance of volumetric modulated arc therapy. *Med Phys* **2021**, *48*, 1003–1018, doi:10.1002/mp.14682.
802. Huang, Y.; Pi, Y.; Ma, K.; Miao, X.; Fu, S.; Chen, H.; Wang, H.; Gu, H.; Shao, Y.; Duan, Y.; et al. Virtual Patient-Specific Quality Assurance of IMRT Using UNet++: Classification, Gamma Passing Rates Prediction, and Dose Difference Prediction. *Front Oncol* **2021**, *11*, 700343, doi:10.3389/fonc.2021.700343.
803. Li, B.; Chen, J.; Guo, W.; Mao, R.; Zheng, X.; Cheng, X.; Cui, T.; Lou, Z.; Wang, T.; Li, D.; et al. Improvement Using Planomics Features on Prediction and Classification of Patient-Specific Quality Assurance Using Head and Neck Volumetric Modulated Arc Therapy Plan. *Front Neurosci* **2021**, *15*, 744296, doi:10.3389/fnins.2021.744296.
804. Chuang, K.C.; Giles, W.; Adamson, J. A tool for patient-specific prediction of delivery discrepancies in machine parameters using trajectory log files. *Medical Physics* **2021**, *48*, 978–990, doi:10.1002/mp.14670.
805. Kuo, C.Y.; Lee, C.C.; Lee, Y.L.; Liou, S.C.; Lee, J.C.; Su, E.C.; Chen, Y.W. Visual light perceptions caused by medical linear accelerator: Findings of machine-learning algorithms in a prospective questionnaire-based case-control study. *PLoS One* **2021**, *16*, e0247597, doi:10.1371/journal.pone.0247597.

806. Ma, C.; Wang, R.; Zhou, S.; Wang, M.; Yue, H.; Zhang, Y.; Wu, H. The structural similarity index for IMRT quality assurance: radiomics-based error classification. *Medical Physics* **2021**, *48*, 80–93, doi:10.1002/mp.14559.
807. Wall, P.D.H.; Fontenot, J.D. Quality assurance-based optimization (QAO): Towards improving patient-specific quality assurance in volumetric modulated arc therapy plans using machine learning. *Phys Med* **2021**, *87*, 136–143, doi:10.1016/j.ejmp.2021.03.017.
808. Sher, D.J.; Godley, A.; Park, Y.; Carpenter, C.; Nash, M.; Hesami, H.; Zhong, X.; Lin, M.H. Prospective study of artificial intelligence-based decision support to improve head and neck radiotherapy plan quality. *Clin Transl Radiat Oncol* **2021**, *29*, 65–70, doi:10.1016/j.ctro.2021.05.006.
809. Zemouri, E.T.; Allam, A. Deep Network Construction using Autoencoder for Abnormality Detection in Radiotherapy Service. 2021; pp. 242–245.
810. Arabi, H.; Dowling, J.A.; Burgos, N.; Han, X.; Greer, P.B.; Koutsouvelis, N.; Zaidi, H. Comparison of synthetic CT generation algorithms for MRI-only radiation planning in the pelvic region. 2018.
811. Emami, H.; Dong, M.; Nejad-Davarani, S.P.; Glide-Hurst, C.K. Generating synthetic CTs from magnetic resonance images using generative adversarial networks. *Med Phys* **2018**, doi:10.1002/mp.13047.
812. Leynes, A.P.; Larson, P.E.Z. Synthetic CT generation using MRI with deep learning: How does the selection of input images affect the resulting synthetic CT? 2018; pp. 6692–6696.
813. Chen, S.; Qin, A.; Zhou, D.; Yan, D. Technical Note: U-net-generated synthetic CT images for magnetic resonance imaging-only prostate intensity-modulated radiation therapy treatment planning. *Med Phys* **2018**, *45*, 5659–5665, doi:10.1002/mp.13247.
814. Zhao, Y.; Liao, S.; Guo, Y.; Zhao, L.; Yan, Z.; Hong, S.; Hermosillo, G.; Liu, T.; Zhou, X.S.; Zhan, Y. Towards MR-only radiotherapy treatment planning: Synthetic CT generation using multi-view deep convolutional neural networks. **2018**, *11070 LNCS*, 286–294, doi:10.1007/978-3-030-00928-1\_33.
815. Arabi, H.; Dowling, J.A.; Burgos, N.; Han, X.; Greer, P.B.; Koutsouvelis, N.; Zaidi, H. Comparative study of algorithms for synthetic CT generation from MRI: Consequences for MRI-guided radiation planning in the pelvic region. *Medical Physics* **2018**, *45*, 5218–5233, doi:10.1002/mp.13187.
816. Johnson, C.; Price, G.; Khalifa, J.; Faivre-Finn, C.; Dekker, A.; Moore, C.; van Herk, M. A method to combine target volume data from 3D and 4D planned thoracic radiotherapy patient cohorts for machine learning applications. *Radiotherapy and Oncology* **2018**, *126*, 355–361, doi:10.1016/j.radonc.2017.11.015.
817. Dinkla, A.M.; Florkow, M.C.; Maspero, M.; Savenije, M.H.F.; Zijlstra, F.; Doornaert, P.A.H.; van Stralen, M.; Philippens, M.E.P.; van den Berg, C.A.T.; Seevinck, P.R. Dosimetric evaluation of synthetic CT for head and neck radiotherapy generated by a patch-based three-dimensional convolutional neural network. *Medical Physics* **2019**, *46*, 4095–4104, doi:10.1002/mp.13663.
818. Florkow, M.C.; Zijlstra, F.; Kerkmeijer, L.G.W.; Maspero, M.; Van Den Berg, C.A.T.; Van Stralen, M.; Seevinck, P.R. The impact of MRI-CT registration errors on deep learning-based synthetic CT generation. 2019.
819. Fu, J.; Yang, Y.; Singhrao, K.; Ruan, D.; Chu, F.I.; Low, D.A.; Lewis, J.H. Deep learning approaches using 2D and 3D convolutional neural networks for generating male pelvic synthetic computed tomography from magnetic resonance imaging. *Medical Physics* **2019**, *46*, 3788–3798, doi:10.1002/mp.13672.
820. Ge, Y.; Wei, D.; Xue, Z.; Wang, Q.; Zhou, X.; Zhan, Y.; Liao, S. Unpaired Mr to CT synthesis with explicit structural constrained adversarial learning. 2019; pp. 1096–1099.
821. Ge, Y.; Xue, Z.; Cao, T.; Liao, S. Unpaired whole-body MR to CT synthesis with correlation coefficient constrained adversarial learning. 2019.
822. Gupta, D.; Kim, M.; Vineberg, K.A.; Balter, J.M. Generation of synthetic CT images from MRI for treatment planning and patient positioning using a 3-channel U-net trained on sagittal images. *Frontiers in Oncology* **2019**, *9*, doi:10.3389/fonc.2019.00964.
823. Jiang, Z.; Chen, Y.; Zhang, Y.; Ge, Y.; Yin, F.F.; Ren, L. Augmentation of CBCT Reconstructed from Under-Sampled Projections Using Deep Learning. *IEEE Transactions on Medical Imaging* **2019**, *38*, 2705–2715, doi:10.1109/TMI.2019.2912791.
824. Kazemifar, S.; McGuire, S.; Timmerman, R.; Wardak, Z.; Nguyen, D.; Park, Y.; Jiang, S.; Owringi, A. MRI-only brain radiotherapy: Assessing the dosimetric accuracy of synthetic CT images generated using a deep learning approach. *Radiotherapy and Oncology* **2019**, *136*, 56–63, doi:10.1016/j.radonc.2019.03.026.
825. Kurz, C.; Maspero, M.; Savenije, M.H.F.; Landry, G.; Kamp, F.; Pinto, M.; Li, M.; Parodi, K.; Belka, C.; Van Den Berg, C.A.T. CBCT correction using a cycle-consistent generative adversarial network and unpaired training to enable photon and proton dose calculation. *Physics in Medicine and Biology* **2019**, *64*, doi:10.1088/1361-6560/ab4d8c.

826. Landry, G.; Hansen, D.; Kamp, F.; Li, M.; Hoyle, B.; Weller, J.; Parodi, K.; Belka, C.; Kurz, C. Comparing Unet training with three different datasets to correct CBCT images for prostate radiotherapy dose calculations. *Physics in Medicine and Biology* **2019**, *64*, doi:10.1088/1361-6560/aaf496.
827. Larroza, A.; Moliner, L.; Alvarez-Gomez, J.M.; Oliver, S.; Espinos-Morato, H.; Vergara-Diaz, M.; Rodriguez-Alvarez, M.J. Deep learning for MRI-based CT synthesis: A comparison of MRI sequences and neural network architectures. 2019.
828. Lei, Y.; Harms, J.; Wang, T.; Liu, Y.; Shu, H.K.; Jani, A.B.; Curran, W.J.; Mao, H.; Liu, T.; Yang, X. MRI-only based synthetic CT generation using dense cycle consistent generative adversarial networks. *Medical Physics* **2019**, *46*, 3565-3581, doi:10.1002/mp.13617.
829. Lei, Y.; Wang, T.; Harms, J.; Fu, Y.; Dong, X.; Curran, W.J.; Liu, T.; Yang, X. CBCT-based synthetic MRI generation for CBCT-guided adaptive radiotherapy. **2019**, *11850 LNCS*, 154-161, doi:10.1007/978-3-030-32486-5\_19.
830. Lei, Y.; Wang, T.; Harms, J.; Shafai-Erfani, G.; Dong, X.; Zhou, J.; Patel, P.; Tang, X.; Liu, T.; Curran, W.J.; et al. Image quality improvement in cone-beam CT using deep learning. 2019.
831. Li, Y.; Li, W.; He, P.; Xiong, J.; Xia, J.; Xie, Y. CT synthesis from MRI images based on deep learning methods for MRI-only radiotherapy. 2019.
832. Liu, F.; Yadav, P.; Baschnagel, A.M.; McMillan, A.B. MR-based treatment planning in radiation therapy using a deep learning approach. *Journal of Applied Clinical Medical Physics* **2019**, *20*, 105-114, doi:10.1002/acm2.12554.
833. Liu, Y.; Lei, Y.; Wang, T.; Kayode, O.; Tian, S.; Liu, T.; Patel, P.; Curran, W.J.; Ren, L.; Yang, X. MRI-based treatment planning for liver stereotactic body radiotherapy: Validation of a deep learning-based synthetic CT generation method. *British Journal of Radiology* **2019**, *92*, doi:10.1259/bjr.20190067.
834. Liu, Y.; Lei, Y.; Wang, Y.; Shafai-Erfani, G.; Wang, T.; Tian, S.; Patel, P.; Jani, A.B.; McDonald, M.; Curran, W.J.; et al. Evaluation of a deep learning-based pelvic synthetic CT generation technique for MRI-based prostate proton treatment planning. *Physics in Medicine and Biology* **2019**, *64*, doi:10.1088/1361-6560/ab41af.
835. Liu, Y.; Lei, Y.; Wang, Y.; Wang, T.; Ren, L.; Lin, L.; McDonald, M.; Curran, W.J.; Liu, T.; Zhou, J.; et al. MRI-based treatment planning for proton radiotherapy: Dosimetric validation of a deep learning-based liver synthetic CT generation method. *Physics in Medicine and Biology* **2019**, *64*, doi:10.1088/1361-6560/ab25bc.
836. Neph, R.; Huang, Y.; Yang, Y.; Sheng, K. DeepMCDose: A deep learning method for efficient monte carlo beamlet dose calculation by predictive denoising in MR-guided radiotherapy. **2019**, *11850 LNCS*, 137-145, doi:10.1007/978-3-030-32486-5\_17.
837. Shen, L.; Zhao, W.; Xing, L. Patient-specific reconstruction of volumetric computed tomography images from a single projection view via deep learning. *Nature Biomedical Engineering* **2019**, *3*, 880-888, doi:10.1038/s41551-019-0466-4.
838. Wang, T.; Lei, Y.; Tian, Z.; Dong, X.; Liu, Y.; Jiang, X.; Curran, W.J.; Liu, T.; Shu, H.K.; Yang, X. Deep learning-based image quality improvement for low-dose computed tomography simulation in radiation therapy. *Journal of Medical Imaging* **2019**, *6*, doi:10.1117/1.JMI.6.4.043504.
839. Wang, Y.; Liu, C.; Zhang, X.; Deng, W. Synthetic CT Generation Based on T2 Weighted MRI of Nasopharyngeal Carcinoma (NPC) Using a Deep Convolutional Neural Network (DCNN). *Frontiers in Oncology* **2019**, *9*, doi:10.3389/fonc.2019.01333.
840. Zhi, S.; Duan, J.; Cai, J.; Mou, X. Artifacts reduction method for phase-resolved Cone-Beam CT (CBCT) images via a prior-guided CNN. 2019.
841. Jang, B.S.; Chang, J.H.; Park, A.J.; Wu, H.G. Generation of virtual lung single-photon emission computed tomography/CT fusion images for functional avoidance radiotherapy planning using machine learning algorithms. *Journal of Medical Imaging and Radiation Oncology* **2019**, *63*, 229-235, doi:10.1111/1754-9485.12868.
842. Lei, Y.; Wang, T.; Harms, J.; Shafai-Erfani, G.; Tian, S.; Higgins, K.; Shu, H.K.; Shim, H.; Mao, H.; Curran, W.J.; et al. MRI-based pseudo CT generation using classification and regression random forest. 2019.
843. Olberg, S.; Zhang, H.; Kennedy, W.R.; Chun, J.; Rodriguez, V.; Zoberi, I.; Thomas, M.A.; Kim, J.S.; Mutic, S.; Green, O.L.; et al. Synthetic CT reconstruction using a deep spatial pyramid convolutional framework for MR-only breast radiotherapy. *Med Phys* **2019**, *46*, 4135-4147, doi:10.1002/mp.13716.
844. Shafai-Erfani, G.; Wang, T.; Lei, Y.; Tian, S.; Patel, P.; Jani, A.B.; Curran, W.J.; Liu, T.; Yang, X. Dose evaluation of MRI-based synthetic CT generated using a machine learning method for prostate cancer radiotherapy. *Medical Dosimetry* **2019**, *44*, e64-e70, doi:10.1016/j.meddos.2019.01.002.
845. Wang, T.; Manohar, N.; Lei, Y.; Dhakaan, A.; Shu, H.K.; Liu, T.; Curran, W.J.; Yang, X. MRI-based treatment planning for brain stereotactic radiosurgery: Dosimetric validation of a learning-based pseudo-CT generation method. *Medical Dosimetry* **2019**, *44*, 199-204, doi:10.1016/j.meddos.2018.06.008.

846. Alvarez Andres, E.; Fidon, L.; Vakalopoulou, M.; Lerousseau, M.; Carré, A.; Sun, R.; Klausner, G.; Ammari, S.; Benzazon, N.; Reuzé, S.; et al. Dosimetry-Driven Quality Measure of Brain Pseudo Computed Tomography Generated From Deep Learning for MRI-Only Radiation Therapy Treatment Planning. *International Journal of Radiation Oncology Biology Physics* **2020**, *108*, 813–823, doi:10.1016/j.ijrobp.2020.05.006.
847. Chen, L.; Liang, X.; Shen, C.; Jiang, S.; Wang, J. Synthetic CT generation from CBCT images via deep learning. *Med Phys* **2020**, *47*, 1115–1125, doi:10.1002/mp.13978.
848. Florkow, M.C.; Guerreiro, F.; Zijlstra, F.; Seravalli, E.; Janssens, G.O.; Maduro, J.H.; Knopf, A.C.; Castelein, R.M.; van Stralen, M.; Raaymakers, B.W.; et al. Deep learning-enabled MRI-only photon and proton therapy treatment planning for paediatric abdominal tumours. *Radiotherapy and Oncology* **2020**, *153*, 220–227, doi:10.1016/j.radonc.2020.09.056.
849. Fu, J.; Singhrao, K.; Cao, M.; Yu, V.; Santhanam, A.P.; Yang, Y.; Guo, M.; Raldow, A.C.; Ruan, D.; Lewis, J.H. Generation of abdominal synthetic CTs from 0.35T MR images using generative adversarial networks for MR-only liver radiotherapy. *Biomedical Physics and Engineering Express* **2020**, *6*, doi:10.1088/2057-1976/ab6e1f.
850. Griner, D.; Garrett, J.W.; Li, Y.; Li, K.; Chen, G.H. Correction for cone beam CT image artifacts via a deep learning method. 2020.
851. Harms, J.; Lei, Y.; Wang, T.; McDonald, M.; Ghavidel, B.; Stokes, W.; Curran, W.J.; Zhou, J.; Liu, T.; Yang, X. Cone-beam CT-derived relative stopping power map generation via deep learning for proton radiotherapy. *Medical Physics* **2020**, *47*, 4416–4427, doi:10.1002/mp.14347.
852. Koike, Y.; Anetai, Y.; Takegawa, H.; Ohira, S.; Nakamura, S.; Tanigawa, N. Deep learning-based metal artifact reduction using cycle-consistent adversarial network for intensity-modulated head and neck radiation therapy treatment planning. *Physica Medica* **2020**, *78*, 8–14, doi:10.1016/j.ejmp.2020.08.018.
853. Koike, Y.; Ohira, S.; Akino, Y.; Sagawa, T.; Yagi, M.; Ueda, Y.; Miyazaki, M.; Sumida, I.; Teshima, T.; Ogawa, K. Deep learning-based virtual noncontrast CT for volumetric modulated arc therapy planning: Comparison with a dual-energy CT-based approach. *Medical Physics* **2020**, *47*, 371–379, doi:10.1002/mp.13925.
854. Largent, A.; Marage, L.; Gicquiau, I.; Nunes, J.C.; Reynaert, N.; Castelli, J.; Chajon, E.; Acosta, O.; Gambarota, G.; de Crevoisier, R.; et al. Head-and-Neck MRI-only radiotherapy treatment planning: From acquisition in treatment position to pseudo-CT generation. *Cancer/Radiotherapie* **2020**, *24*, 288–297, doi:10.1016/j.canrad.2020.01.008.
855. Li, W.; Li, Y.; Qin, W.; Liang, X.; Xu, J.; Xiong, J.; Xie, Y. Magnetic resonance image (MRI) synthesis from brain computed tomography (CT) images based on deep learning methods for magnetic resonance (MR)-guided radiotherapy. *Quantitative Imaging in Medicine and Surgery* **2020**, *10*, 1223–1236, doi:10.21037/QIMS-19-885.
856. Li, Y.; Wei, J.; Qi, Z.; Sun, Y.; Lu, Y. Synthesize CT from paired MRI of the same patient with patch-based generative adversarial network. 2020.
857. Liu, L.; Johansson, A.; Cao, Y.; Dow, J.; Lawrence, T.S.; Balter, J.M. Abdominal synthetic CT generation from MR Dixon images using a U-net trained with 'semi-synthetic' CT data. *Physics in Medicine and Biology* **2020**, *65*, doi:10.1088/1361-6560/ab8cd2.
858. Liu, Y.; Lei, Y.; Wang, T.; Fu, Y.; Tang, X.; Curran, W.J.; Liu, T.; Patel, P.; Yang, X. CBCT-based synthetic CT generation using deep-attention cycleGAN for pancreatic adaptive radiotherapy. *Medical Physics* **2020**, *47*, 2472–2483, doi:10.1002/mp.14121.
859. Liu, Z.; Miao, J.; Huang, P.; Wang, W.; Wang, X.; Zhai, Y.; Wang, J.; Zhou, Z.; Bi, N.; Tian, Y.; et al. A deep learning method for producing ventilation images from 4DCT: First comparison with technegas SPECT ventilation. *Medical Physics* **2020**, *47*, 1249–1257, doi:10.1002/mp.14004.
860. Madesta, F.; Sentker, T.; Gauer, T.; Werner, R. Self-contained deep learning-based boosting of 4D cone-beam CT reconstruction. *Medical Physics* **2020**, *47*, 5619–5631, doi:10.1002/mp.14441.
861. Maspero, M.; Houweling, A.C.; Savenije, M.H.F.; van Heijst, T.C.F.; Verhoeff, J.J.C.; Kotte, A.N.T.J.; van den Berg, C.A.T. A single neural network for cone-beam computed tomography-based radiotherapy of head-and-neck, lung and breast cancer. *Physics and Imaging in Radiation Oncology* **2020**, *14*, 24–31, doi:10.1016/j.phro.2020.04.002.
862. Massa, H.A.; Johnson, J.M.; McMillan, A.B. Comparison of deep learning synthesis of synthetic CTs using clinical MRI inputs. *Physics in Medicine and Biology* **2020**, *65*, doi:10.1088/1361-6560/abc5cb.
863. Oktay, O.; Nanavati, J.; Schwaighofer, A.; Carter, D.; Bristow, M.; Tanno, R.; Jena, R.; Barnett, G.; Noble, D.; Rimmer, Y.; et al. Evaluation of Deep Learning to Augment Image-Guided Radiotherapy for Head and Neck and Prostate Cancers. *JAMA Network Open* **2020**, doi:10.1001/jamanetworkopen.2020.27426.
864. Olin, A.B.; Hansen, A.E.; Rasmussen, J.H.; Ladefoged, C.N.; Berthelsen, A.K.; Håkansson, K.; Vogelius, I.R.; Specht, L.; Gothelf, A.B.; Kjaer, A.; et al. Feasibility of Multiparametric Positron Emission Tomography/Magnetic Resonance Imaging as a One-Stop Shop for Radiation Therapy Planning for Patients with Head and Neck Cancer. *International Journal of Radiation Oncology Biology Physics* **2020**, *108*, 1329–1338, doi:10.1016/j.ijrobp.2020.07.024.

865. Qi, M.; Li, Y.; Wu, A.; Jia, Q.; Li, B.; Sun, W.; Dai, Z.; Lu, X.; Zhou, L.; Deng, X.; et al. Multi-sequence MR image-based synthetic CT generation using a generative adversarial network for head and neck MRI-only radiotherapy. *Medical Physics* **2020**, *47*, 1880–1894, doi:10.1002/mp.14075.
866. Qian, P.; Xu, K.; Wang, T.; Zheng, Q.; Yang, H.; Baydoun, A.; Zhu, J.; Traughber, B.; Muzic, R.F., Jr. Estimating CT from MR Abdominal Images Using Novel Generative Adversarial Networks. *Journal of Grid Computing* **2020**, *18*, 211–226, doi:10.1007/s10723-020-09513-3.
867. Mori, S.; Hirai, R.; Sakata, Y. Simulated four-dimensional CT for markerless tumor tracking using a deep learning network with multi-task learning. *Phys Med* **2020**, *80*, 151–158, doi:10.1016/j.ejmp.2020.10.023.
868. Sherwani, M.K.; Zaffino, P.; Bruno, P.; Spadea, M.F.; Calimeri, F. Evaluating the Impact of Training Loss on MR to Synthetic CT Conversion. **2020**, *12565 LNCS*, 563–573, doi:10.1007/978-3-030-64583-0\_50.
869. Singhrao, K.; Fu, J.; Parikh, N.R.; Mikaelian, A.G.; Ruan, D.; Kishan, A.U.; Lewis, J.H. A generative adversarial network-based (GAN-based) architecture for automatic fiducial marker detection in prostate MRI-only radiotherapy simulation images. *Medical Physics* **2020**, *47*, 6405–6413, doi:10.1002/mp.14498.
870. van Harten, L.D.; Wolterink, J.M.; Verhoeff, J.J.C.; Išgum, I. Automatic online quality control of synthetic CTs. 2020.
871. Wang, T.; Harms, J.; Lei, Y.; Ghavidel, B.; Stokes, W.; Liu, T.; Curran, W.J.; McDonald, M.; Zhou, J.; Yang, X. Deep learning-based relative stopping power mapping generation with cone-beam CT in proton radiation therapy. 2020.
872. Tie, X.; Lam, S.K.; Zhang, Y.; Lee, K.H.; Au, K.H.; Cai, J. Pseudo-CT generation from multi-parametric MRI using a novel multi-channel multi-path conditional generative adversarial network for nasopharyngeal carcinoma patients. *Med Phys* **2020**, *47*, 1750–1762, doi:10.1002/mp.14062.
873. Koike, Y.; Akino, Y.; Sumida, I.; Shiomi, H.; Mizuno, H.; Yagi, M.; Isohashi, F.; Seo, Y.; Suzuki, O.; Ogawa, K. Feasibility of synthetic computed tomography generated with an adversarial network for multi-sequence magnetic resonance-based brain radiotherapy. *J Radiat Res* **2020**, *61*, 92–103, doi:10.1093/jrr/trz063.
874. Yuan, N.; Dyer, B.; Rao, S.; Chen, Q.; Benedict, S.; Shang, L.; Kang, Y.; Qi, J.; Rong, Y. Convolutional neural network enhancement of fast-scan low-dose cone-beam CT images for head and neck radiotherapy. *Physics in Medicine and Biology* **2020**, *65*, doi:10.1088/1361-6560/ab6240.
875. Handrack, J.; Bangert, M.; Möhler, C.; Bostel, T.; Greilich, S. Towards a generalised development of synthetic CT images and assessment of their dosimetric accuracy. *Acta Oncologica* **2020**, *59*, 180–187, doi:10.1080/0284186X.2019.1684558.
876. O'Briain, T.B.; Yi, K.M.; Bazalova-Carter, M. Technical Note: Synthesizing of lung tumors in computed tomography images. *Medical Physics* **2020**, *47*, 5070–5076, doi:10.1002/mp.14437.
877. Rouf, S.; Shen, C.; Cao, Y.; Davis, C.; Jia, X.; Lou, Y. A Neural Network Approach for Image Reconstruction from a Single X-Ray Projection. **2020**, *1065 CCIS*, 208–219, doi:10.1007/978-3-030-39343-4\_18.
878. Zhang, B.; Lian, Z.; Zhong, L.; Zhang, X.; Dong, Y.; Chen, Q.; Zhang, L.; Mo, X.; Huang, W.; Yang, W.; et al. Machine-learning based MRI radiomics models for early detection of radiation-induced brain injury in nasopharyngeal carcinoma. *BMC Cancer* **2020**, *20*, doi:10.1186/s12885-020-06957-4.
879. Baydoun, A.; Xu, K.; Heo, J.U.; Yang, H.; Zhou, F.; Bethell, L.A.; Fredman, E.T.; Ellis, R.J.; Podder, T.K.; Traughber, M.S.; et al. Synthetic CT Generation of the Pelvis in Patients with Cervical Cancer: A Single Input Approach Using Generative Adversarial Network. *IEEE Access* **2021**, *9*, 17208–17221, doi:10.1109/ACCESS.2021.3049781.
880. Bird, D.; Nix, M.G.; McCallum, H.; Teo, M.; Gilbert, A.; Casanova, N.; Cooper, R.; Buckley, D.L.; Sebag-Montefiore, D.; Speight, R.; et al. Multicentre, deep learning, synthetic-CT generation for ano-rectal MR-only radiotherapy treatment planning. *Radiotherapy and Oncology* **2021**, *156*, 23–28, doi:10.1016/j.radonc.2020.11.027.
881. Brou Boni, K.N.D.; Klein, J.; Gulyban, A.; Reynaert, N.; Pasquier, D. Improving generalization in MR-to-CT synthesis in radiotherapy by using an augmented cycle generative adversarial network with unpaired data. *Medical Physics* **2021**, *48*, 3003–3010, doi:10.1002/mp.14866.
882. Cao, G.; Liu, S.; Mao, H.; Zhang, S. Improved CycleGAN for MR to CT synthesis. 2021; pp. 205–208.
883. Chen, L.; Liang, X.; Shen, C.; Nguyen, D.; Jiang, S.; Wang, J. Synthetic CT generation from CBCT images via unsupervised deep learning. *Physics in Medicine and Biology* **2021**, *66*, doi:10.1088/1361-6560/ac01b6.
884. Chourak, H.; Barateau, A.; Mylona, E.; Cadin, C.; Lafond, C.; Greer, P.; Dowling, J.; Jean Claude, N.; Crevoisier, R.D.; Acosta, O. Voxel-wise analysis for spatial characterisation of pseudo-ct errors in MRI-only radiotherapy planning. 2021; pp. 395–399.

885. Dai, X.; Lei, Y.; Wang, T.; Zhou, J.; Roper, J.; McDonald, M.; Beitler, J.J.; Curran, W.J.; Liu, T.; Yang, X. Automated delineation of head and neck organs at risk using synthetic MRI-aided mask scoring regional convolutional neural network. *Medical Physics* **2021**, *48*, 5862–5873, doi:10.1002/mp.15146.
886. Dai, Z.; Zhang, Y.; Zhu, L.; Tan, J.; Yang, G.; Zhang, B.; Cai, C.; Jin, H.; Meng, H.; Tan, X.; et al. Geometric and Dosimetric Evaluation of Deep Learning-Based Automatic Delineation on CBCT-Synthesized CT and Planning CT for Breast Cancer Adaptive Radiotherapy: A Multi-Institutional Study. *Frontiers in Oncology* **2021**, *11*, doi:10.3389/fonc.2021.725507.
887. Dong, G.; Zhang, C.; Liang, X.; Deng, L.; Zhu, Y.; Zhu, X.; Zhou, X.; Song, L.; Zhao, X.; Xie, Y. A Deep Unsupervised Learning Model for Artifact Correction of Pelvis Cone-Beam CT. *Frontiers in Oncology* **2021**, *11*, doi:10.3389/fonc.2021.686875.
888. Farjam, R.; Nagar, H.; Kathy Zhou, X.; Ouellette, D.; Chiara Formenti, S.; DeWyngaert, J.K. Deep learning-based synthetic CT generation for MR-only radiotherapy of prostate cancer patients with 0.35T MRI linear accelerator. *Journal of Applied Clinical Medical Physics* **2021**, *22*, 93–104, doi:10.1002/acm2.13327.
889. Fonseca, G.P.; Baer-Beck, M.; Fournie, E.; Hofmann, C.; Rinaldi, I.; Ollers, M.C.; van Elmpt, W.J.C.; Verhaegen, F. Evaluation of novel AI-based extended field-of-view CT reconstructions. *Medical Physics* **2021**, *48*, 3583–3594, doi:10.1002/mp.14937.
890. Freedman, J.N.; Gurney-Champion, O.J.; Nill, S.; Shiarli, A.M.; Bainbridge, H.E.; Mandeville, H.C.; Koh, D.M.; McDonald, F.; Kachelrieß, M.; Oelfke, U.; et al. Rapid 4D-MRI reconstruction using a deep radial convolutional neural network: Dracula. *Radiotherapy and Oncology* **2021**, *159*, 209–217, doi:10.1016/j.radonc.2021.03.034.
891. Yoo, G.S.; Luu, H.M.; Kim, H.; Park, W.; Pyo, H.; Han, Y.; Park, J.Y.; Park, S.H. Feasibility of Synthetic Computed Tomography Images Generated from Magnetic Resonance Imaging Scans Using Various Deep Learning Methods in the Planning of Radiation Therapy for Prostate Cancer. *Cancers (Basel)* **2021**, *14*, doi:10.3390/cancers14010040.
892. Groot Koerkamp, M.L.; De Hond, Y.J.M.; Maspero, M.; Kontaxis, C.; Mandija, S.; Vasmel, J.E.; Charaghvandi, R.K.; Philippens, M.E.P.; Van Asselen, B.; Van Den Bongard, H.J.G.D.; et al. Synthetic CT for single-fraction neoadjuvant partial breast irradiation on an MRI-linac. *Physics in Medicine and Biology* **2021**, *66*, doi:10.1088/1361-6560/abf1ba.
893. Kalantar, R.; Messiou, C.; Winfield, J.M.; Renn, A.; Latifoltojar, A.; Downey, K.; Sohaib, A.; Lalondrelle, S.; Koh, D.M.; Blackledge, M.D. CT-Based Pelvic T1-Weighted MR Image Synthesis Using UNet, UNet++ and Cycle-Consistent Generative Adversarial Network (Cycle-GAN). *Frontiers in Oncology* **2021**, *11*, doi:10.3389/fonc.2021.665807.
894. Kang, S.K.; An, H.J.; Jin, H.; Kim, J.I.; Chie, E.K.; Park, J.M.; Lee, J.S. Synthetic CT generation from weakly paired MR images using cycle-consistent GAN for MR-guided radiotherapy. *Biomedical Engineering Letters* **2021**, *11*, 263–271, doi:10.1007/s13534-021-00195-8.
895. Lei, Y.; Tian, Z.; Wang, T.; Roper, J.; Higgins, K.; Bradley, J.D.; Curran, W.J.; Liu, T.; Yang, X. Deep learning-based 3D image generation using a single 2D projection image. **2021**.
896. Lerner, M.; Medin, J.; Jamtheim Gustafsson, C.; Alkner, S.; Siversson, C.; Olsson, L.E. Clinical validation of a commercially available deep learning software for synthetic CT generation for brain. *Radiation Oncology* **2021**, *16*, doi:10.1186/s13014-021-01794-6.
897. Li, W.; Kazemifar, S.; Bai, T.; Nguyen, D.; Weng, Y.; Li, Y.; Xia, J.; Xiong, J.; Xie, Y.; Owrangi, A.; et al. Synthesizing CT images from MR images with deep learning: Model generalization for different datasets through transfer learning. *Biomedical Physics and Engineering Express* **2021**, *7*, doi:10.1088/2057-1976/abe3a7.
898. Liu, J.; Yan, H.; Cheng, H.; Liu, J.; Sun, P.; Wang, B.; Mao, R.; Du, C.; Luo, S. CBCT-based synthetic CT generation using generative adversarial networks with disentangled representation. *Quantitative Imaging in Medicine and Surgery* **2021**, *11*, 4820–4834, doi:10.21037/qims-20-1056.
899. Liu, R.; Lei, Y.; Wang, T.; Zhou, J.; Roper, J.; Lin, L.; McDonald, M.W.; Bradley, J.D.; Curran, W.J.; Liu, T.; et al. Synthetic dual-energy CT for MRI-only based proton therapy treatment planning using label-GAN. *Physics in Medicine and Biology* **2021**, *66*, doi:10.1088/1361-6560/abe736.
900. Liu, X.; Emami, H.; Nejad-Davarani, S.P.; Morris, E.; Schultz, L.; Dong, M.; K. Glide-Hurst, C. Performance of deep learning synthetic CTs for MR-only brain radiation therapy. *Journal of Applied Clinical Medical Physics* **2021**, *22*, 308–317, doi:10.1002/acm2.13139.
901. Gotoh, M.; Nakaura, T.; Funama, Y.; Morita, K.; Sakabe, D.; Uetani, H.; Nagayama, Y.; Kidoh, M.; Hatemura, M.; Masuda, T.; et al. Virtual magnetic resonance lumbar spine images generated from computed tomography images using conditional generative adversarial networks. *Radiography (Lond)* **2021**, doi:10.1016/j.radi.2021.10.006.
902. Ma, X.; Chen, X.; Li, J.; Wang, Y.; Men, K.; Dai, J. MRI-Only Radiotherapy Planning for Nasopharyngeal Carcinoma Using Deep Learning. *Frontiers in Oncology* **2021**, *11*, doi:10.3389/fonc.2021.713617.

903. Ohira, S.; Koike, Y.; Akino, Y.; Kanayama, N.; Wada, K.; Ueda, Y.; Masaoka, A.; Washio, H.; Miyazaki, M.; Koizumi, M.; et al. Improvement of image quality for pancreatic cancer using deep learning-generated virtual monochromatic images: Comparison with single-energy computed tomography. *Physica Medica* **2021**, *85*, 8–14, doi:10.1016/j.ejmp.2021.03.035.
904. Olberg, S.; Chun, J.; Su Choi, B.; Park, I.; Kim, H.; Kim, T.; Sung Kim, J.; Green, O.; Park, J.C. Abdominal synthetic CT reconstruction with intensity projection prior for MRI-only adaptive radiotherapy. *Physics in Medicine and Biology* **2021**, *66*, doi:10.1088/1361-6560/ac279e.
905. Olin, A.B.; Thomas, C.; Hansen, A.E.; Rasmussen, J.H.; Krokos, G.; Urbano, T.G.; Michaelidou, A.; Jakoby, B.; Ladefoged, C.N.; Berthelsen, A.K.; et al. Robustness and Generalizability of Deep Learning Synthetic Computed Tomography for Positron Emission Tomography/Magnetic Resonance Imaging–Based Radiation Therapy Planning of Patients With Head and Neck Cancer. *Advances in Radiation Oncology* **2021**, *6*, doi:10.1016/j.adro.2021.100762.
906. Porter, E.M.; Myziuk, N.K.; Quinn, T.J.; Lozano, D.; Peterson, A.B.; Quach, D.M.; Siddiqui, Z.A.; Guerrero, T.M. Synthetic pulmonary perfusion images from 4DCT for functional avoidance using deep learning. *Physics in Medicine and Biology* **2021**, *66*, doi:10.1088/1361-6560/ac16ec.
907. Qiu, R.L.J.; Lei, Y.; Kesarwala, A.H.; Higgins, K.; Bradley, J.D.; Curran, W.J.; Liu, T.; Yang, X. Chest CBCT-based synthetic CT using cycle-consistent adversarial network with histogram matching. 2021.
908. Ren, G.; Xiao, H.; Lam, S.K.; Yang, D.; Li, T.; Teng, X.; Qin, J.; Cai, J. Deep learning-based bone suppression in chest radiographs using CT-derived features: A feasibility study. *Quantitative Imaging in Medicine and Surgery* **2021**, *11*, 4807–4819, doi:10.21037/qims-20-1230.
909. Rossi, M.; Belotti, G.; Paganelli, C.; Pella, A.; Barcellini, A.; Cerveri, P.; Baroni, G. Image-based shading correction for narrow-FOV truncated pelvic CBCT with deep convolutional neural networks and transfer learning. *Medical Physics* **2021**, *48*, 7112–7126, doi:10.1002/mp.15282.
910. Rusanov, B.; Ebert, M.A.; Mukwada, G.; Hassan, G.M.; Sabet, M. A convolutional neural network for estimating cone-beam CT intensity deviations from virtual CT projections. *Physics in Medicine and Biology* **2021**, *66*, doi:10.1088/1361-6560/ac27b6.
911. Song, L.; Li, Y.; Dong, G.; Lambo, R.; Qin, W.; Wang, Y.; Zhang, G.; Liu, J.; Xie, Y. Artificial intelligence-based bone-enhanced magnetic resonance image-a computed tomography/magnetic resonance image composite image modality in nasopharyngeal carcinoma radiotherapy. *Quant Imaging Med Surg* **2021**, *11*, 4709–4720, doi:10.21037/qims-20-1239.
912. Sreeja, S.; Mubarak, D.M.N. Pseudo Computed Tomography Image Generation from Brain Magnetic Resonance Image for Radiation Therapy Treatment Planning Using DCNN-UNET. *Webology* **2021**, *18*, 704–726, doi:10.14704/WEB/V18SI05/WEB18256.
913. Tien, H.J.; Yang, H.C.; Shueng, P.W.; Chen, J.C. Cone-beam CT image quality improvement using Cycle-Deblur consistent adversarial networks (Cycle-Deblur GAN) for chest CT imaging in breast cancer patients. *Scientific Reports* **2021**, *11*, doi:10.1038/s41598-020-80803-2.
914. Tsekas, G.; Bol, G.H.; Raaymakers, B.W.; Kontaxis, C. DeepDose: A robust deep learning-based dose engine for abdominal tumours in a 1.5 T MRI radiotherapy system. *Physics in Medicine and Biology* **2021**, *66*, doi:10.1088/1361-6560/abe3d1.
915. Li, X.; Yadav, P.; McMillan, A.B. Synthetic Computed Tomography Generation from 0.35T Magnetic Resonance Images for Magnetic Resonance-Only Radiation Therapy Planning Using Perceptual Loss Models. *Pract Radiat Oncol* **2022**, *12*, e40–e48, doi:10.1016/j.prro.2021.08.007.
916. Xue, X.; Ding, Y.; Shi, J.; Hao, X.; Li, X.; Li, D.; Wu, Y.; An, H.; Jiang, M.; Wei, W.; et al. Cone Beam CT (CBCT) Based Synthetic CT Generation Using Deep Learning Methods for Dose Calculation of Nasopharyngeal Carcinoma Radiotherapy. *Technol Cancer Res Treat* **2021**, *20*, 15330338211062415, doi:10.1177/15330338211062415.
917. Xie, H.; Lei, Y.; Wang, T.; Patel, P.; Curran, W.J.; Liu, T.; Tang, X.; Yang, X. Generation of contrast-enhanced ct with residual cycle-consistent generative adversarial network (res-cycleGAN). 2021.
918. Xie, H.; Lei, Y.; Wang, T.; Tian, Z.; Roper, J.; Bradley, J.D.; Curran, W.J.; Tang, X.; Liu, T.; Yang, X. High through-plane resolution CT imaging with self-supervised deep learning. *Physics in Medicine and Biology* **2021**, *66*, doi:10.1088/1361-6560/ac0684.
919. Koide, Y.; Shimizu, H.; Wakabayashi, K.; Kitagawa, T.; Aoyama, T.; Miyauchi, R.; Tachibana, H.; Kodaira, T. Synthetic breath-hold CT generation from free-breathing CT: a novel deep learning approach to predict cardiac dose reduction in deep-inspiration breath-hold radiotherapy. *J Radiat Res* **2021**, doi:10.1093/jrr/rrab075.

920. Liu, Y.; Chen, A.; Shi, H.; Huang, S.; Zheng, W.; Liu, Z.; Zhang, Q.; Yang, X. CT synthesis from MRI using multi-cycle GAN for head-and-neck radiation therapy. *Comput Med Imaging Graph* **2021**, *91*, 101953, doi:10.1016/j.compmedimag.2021.101953.
921. Yu, L.; Zhang, Z.; Li, X.; Ren, H.; Zhao, W.; Xing, L. Metal artifact reduction in 2D CT images with self-supervised cross-domain learning. *Physics in Medicine and Biology* **2021**, *66*, doi:10.1088/1361-6560/ac195c.
922. Zhang, Y.; Yue, N.; Su, M.Y.; Liu, B.; Ding, Y.; Zhou, Y.; Wang, H.; Kuang, Y.; Nie, K. Improving CBCT quality to CT level using deep learning with generative adversarial network. *Medical Physics* **2021**, *48*, 2816–2826, doi:10.1002/mp.14624.
923. Zhao, J.; Chen, Z.; Wang, J.; Xia, F.; Peng, J.; Hu, Y.; Hu, W.; Zhang, Z. MV CBCT-Based Synthetic CT Generation Using a Deep Learning Method for Rectal Cancer Adaptive Radiotherapy. *Frontiers in Oncology* **2021**, *11*, doi:10.3389/fonc.2021.655325.
924. Zhi, S.; Mou, X. Tn-net: A spatiotemporal plus prior image-based convolutional neural network for 4d-cbct reconstructions enhancement. 2021.
925. Zimmermann, L.; Buschmann, M.; Herrmann, H.; Heilemann, G.; Kuess, P.; Goldner, G.; Nyholm, T.; Georg, D.; Nesvacil, N. An MR-only acquisition and artificial intelligence based image-processing protocol for photon and proton therapy using a low field MR. *Zeitschrift für Medizinische Physik* **2021**, *31*, 78–88, doi:10.1016/j.zemedi.2020.10.004.
926. Boukellouz, W.; Moussaoui, A. Magnetic resonance-driven pseudo CT image using patch-based multi-modal feature extraction and ensemble learning with stacked generalisation. *Journal of King Saud University - Computer and Information Sciences* **2021**, *33*, 999–1007, doi:10.1016/j.jksuci.2019.06.002.
927. Santhanam, A.P.; Stiehl, B.; Lauria, M.; Hasse, K.; Barjaktarevic, I.; Goldin, J.; Low, D.A. An adversarial machine learning framework and biomechanical model-guided approach for computing 3D lung tissue elasticity from end-expiration 3DCT. *Medical Physics* **2021**, *48*, 667–675, doi:10.1002/mp.14252.
928. Szalkowski, G.; Nie, D.; Zhu, T.; Yap, P.T.; Lian, J. Synthetic digital reconstructed radiographs for MR-only robotic stereotactic radiation therapy: A proof of concept. *Computers in Biology and Medicine* **2021**, *138*, doi:10.1016/j.compbimed.2021.104917.
929. Vinas, L.; Scholey, J.; Descovich, M.; Kearney, V.; Sudhyadhom, A. Improved contrast and noise of megavoltage computed tomography (MVCT) through cycle-consistent generative machine learning. *Medical Physics* **2021**, *48*, 676–690, doi:10.1002/mp.14616.
930. Wang, T.; Lei, Y.; Harms, J.; Ghavidel, B.; Lin, L.; Beitler, J.J.; McDonald, M.; Curran, W.J.; Liu, T.; Zhou, J.; et al. Learning-based stopping power mapping on dual-energy CT for proton radiation therapy. *International Journal of Particle Therapy* **2021**, *7*, 46–60, doi:10.14338/IJPT-D-20-00020.1.
931. Yousefi Moteghaed, N.; Mostaar, A.; Azadeh, P. Generating pseudo-computerized tomography (P-CT) scan images from magnetic resonance imaging (MRI) images using machine learning algorithms based on fuzzy theory for radiotherapy treatment planning. *Medical Physics* **2021**, *48*, 7016–7027, doi:10.1002/mp.15174.
932. Babier, A.; Boutilier, J.J.; McNiven, A.L.; Chan, T.C.Y. Knowledge-based automated planning for oropharyngeal cancer. *Med Phys* **2018**, *45*, 2875–2883, doi:10.1002/mp.12930.
933. Dong, P.; Liu, H.; Xing, L. Monte Carlo tree search -based non-coplanar trajectory design for station parameter optimized radiation therapy (SPORT). *Physics in Medicine and Biology* **2018**, *63*, doi:10.1088/1361-6560/aaca17.
934. Alpuche Aviles, J.E.; Cordero Marcos, M.I.; Sasaki, D.; Sutherland, K.; Kane, B.; Kuusela, E. Creation of knowledge-based planning models intended for large scale distribution: Minimizing the effect of outlier plans. *J Appl Clin Med Phys* **2018**, *19*, 215–226, doi:10.1002/acm2.12322.
935. Landers, A.; Neph, R.; Scalzo, F.; Ruan, D.; Sheng, K. Performance comparison of knowledge-based dose prediction techniques based on limited patient data. *Technology in Cancer Research and Treatment* **2018**, *17*, doi:10.1177/1533033818811150.
936. Shirato, H.; Le, Q.T.; Kobashi, K.; Prayongrat, A.; Takao, S.; Shimizu, S.; Giaccia, A.; Xing, L.; Umegaki, K. Selection of external beam radiotherapy approaches for precise and accurate cancer treatment. *Journal of Radiation Research* **2018**, *59*, i2–i10, doi:10.1093/jrr/rrx092.
937. Virgolin, M.; van Dijk, I.W.E.M.; Wiersma, J.; Ronckers, C.M.; Witteveen, C.; Bel, A.; Alderliesten, T.; Bosman, P.A.N. On the feasibility of automatically selecting similar patients in highly individualized radiotherapy dose reconstruction for historic data of pediatric cancer survivors. *Medical Physics* **2018**, *45*, 1504–1517, doi:10.1002/mp.12802.
938. Chen, X.; Men, K.; Li, Y.; Yi, J.; Dai, J. A feasibility study on an automated method to generate patient-specific dose distributions for radiotherapy using deep learning. *Med Phys* **2019**, *46*, 56–64, doi:10.1002/mp.13262.

939. Fan, J.; Wang, J.; Chen, Z.; Hu, C.; Zhang, Z.; Hu, W. Automatic treatment planning based on three-dimensional dose distribution predicted from deep learning technique. *Medical Physics* **2019**, *46*, 370–381, doi:10.1002/mp.13271.
940. Nguyen, D.; Barkousaraie, A.S.; Shen, C.; Jia, X.; Jiang, S. Generating Pareto Optimal Dose Distributions for Radiation Therapy Treatment Planning. **2019**, *11769 LNCS*, 59–67, doi:10.1007/978-3-030-32226-7\_7.
941. Nguyen, D.; Long, T.; Jia, X.; Lu, W.; Gu, X.; Iqbal, Z.; Jiang, S. A feasibility study for predicting optimal radiation therapy dose distributions of prostate cancer patients from patient anatomy using deep learning. *Scientific Reports* **2019**, *9*, doi:10.1038/s41598-018-37741-x.
942. Sadeghnejad Barkousaraie, A.; Ogunmolu, O.; Jiang, S.; Nguyen, D. Using supervised learning and guided monte carlo tree search for beam orientation optimization in radiation therapy. **2019**, *11850 LNCS*, 1–9, doi:10.1007/978-3-030-32486-5\_1.
943. Shen, C.; Gonzalez, Y.; Klages, P.; Qin, N.; Jung, H.; Chen, L.; Nguyen, D.; Jiang, S.B.; Jia, X. Intelligent inverse treatment planning via deep reinforcement learning, a proof-of-principle study in high dose-rate brachytherapy for cervical cancer. *Physics in Medicine and Biology* **2019**, *64*, doi:10.1088/1361-6560/ab18bf.
944. Bai, X.; Shan, G.; Chen, M.; Wang, B. Approach and assessment of automated stereotactic radiotherapy planning for early stage non-small-cell lung cancer. *BioMedical Engineering Online* **2019**, *18*, doi:10.1186/s12938-019-0721-7.
945. Castriconi, R.; Fiorino, C.; Broggi, S.; Cozzarini, C.; Di Muzio, N.; Calandrino, R.; Cattaneo, G.M. Comprehensive Intra-Institution stepping validation of knowledge-based models for automatic plan optimization. *Phys Med* **2019**, *57*, 231–237, doi:10.1016/j.ejmp.2018.12.002.
946. Sheng, Y.; Li, T.; Yoo, S.; Yin, F.F.; Blitzblau, R.; Horton, J.K.; Ge, Y.; Wu, Q.J. Automatic planning of whole breast radiation therapy using machine learning models. *Frontiers in Oncology* **2019**, *9*, doi:10.3389/fonc.2019.00750.
947. Bohara, G.; Sadeghnejad Barkousaraie, A.; Jiang, S.; Nguyen, D. Using deep learning to predict beam-tunable Pareto optimal dose distribution for intensity-modulated radiation therapy. *Medical Physics* **2020**, *47*, 3898–3912, doi:10.1002/mp.14374.
948. Nguyen, D.; McBeth, R.; Sadeghnejad Barkousaraie, A.; Bohara, G.; Shen, C.; Jia, X.; Jiang, S. Incorporating human and learned domain knowledge into training deep neural networks: A differentiable dose-volume histogram and adversarial inspired framework for generating Pareto optimal dose distributions in radiation therapy. *Med Phys* **2020**, *47*, 837–849, doi:10.1002/mp.13955.
949. Dai, X.; Lei, Y.; Zhang, Y.; Qiu, R.L.J.; Wang, T.; Dresser, S.A.; Curran, W.J.; Patel, P.; Liu, T.; Yang, X. Automatic multi-catheter detection using deeply supervised convolutional neural network in MRI-guided HDR prostate brachytherapy. *Medical Physics* **2020**, *47*, 4115–4124, doi:10.1002/mp.14307.
950. Dong, P.; Xing, L. Deep DoseNet: A deep neural network for accurate dosimetric transformation between different spatial resolutions and/or different dose calculation algorithms for precision radiation therapy. *Physics in Medicine and Biology* **2020**, *65*, doi:10.1088/1361-6560/ab652d.
951. Fan, J.; Xing, L.; Dong, P.; Wang, J.; Hu, W.; Yang, Y. Data-driven dose calculation algorithm based on deep U-Net. *Physics in Medicine and Biology* **2020**, *65*, doi:10.1088/1361-6560/abca05.
952. Fu, J.; Bai, J.; Liu, Y.; Ni, C. Fast Monte Carlo dose calculation based on deep learning. 2020; pp. 721–726.
953. Gronberg, M.P.; Gay, S.S.; Netherton, T.J.; Rhee, D.J.; Court, L.E.; Cardenas, C.E. Technical Note: Dose prediction for head and neck radiotherapy using a three-dimensional dense dilated U-net architecture. *Med Phys* **2021**, *48*, 5567–5573, doi:10.1002/mp.14827.
954. Jihong, C.; Penggang, B.; Xiuchun, Z.; Kaiqiang, C.; Wenjuan, C.; Yitao, D.; Jiwei, Q.; Kerun, Q.; Jing, Z.; Tianming, W. Automated Intensity Modulated Radiation Therapy Treatment Planning for Cervical Cancer Based on Convolution Neural Network. *Technology in cancer research & treatment* **2020**, *19*, doi:10.1177/1533033820957002.
955. Kisling, K.; Cardenas, C.; Anderson, B.M.; Zhang, L.; Jhingran, A.; Simonds, H.; Balter, P.; Howell, R.M.; Schmeler, K.; Beadle, B.M.; et al. Automatic Verification of Beam Apertures for Cervical Cancer Radiation Therapy. *Practical Radiation Oncology* **2020**, *10*, e415–e424, doi:10.1016/j.prro.2020.05.001.
956. Kontaxis, C.; Bol, G.H.; Lagendijk, J.J.W.; Raaymakers, B.W. DeepDose: Towards a fast dose calculation engine for radiation therapy using deep learning. *Physics in Medicine and Biology* **2020**, *65*, doi:10.1088/1361-6560/ab7630.
957. Li, X.; Zhang, J.; Sheng, Y.; Chang, Y.; Yin, F.F.; Ge, Y.; Wu, Q.J.; Wang, C. Automatic IMRT planning via static field fluence prediction (AIP-SFFP): a deep learning algorithm for real-time prostate treatment planning. *Phys Med Biol* **2020**, *65*, 175014, doi:10.1088/1361-6560/aba5eb.

958. Liu, R.; Bai, J.; Zhao, K.; Zhang, K.; Ni, C. A New Deep-Learning-based Model for Predicting 3D Radiotherapy Dose Distribution in Various Scenarios. 2020; pp. 748-753.
959. Liu, R.; Bai, J.; Zhou, J.; Zhang, K.; Ni, C. A Feasibility Study for Predicting 3D Radiotherapy Dose Distribution of Lung VMAT Patients. 2020; pp. 1304-1308.
960. Liu, Z.; Chen, X.; Men, K.; Yi, J.; Dai, J. A deep learning model to predict dose-volume histograms of organs at risk in radiotherapy treatment plans. *Medical Physics* **2020**, *47*, 5467-5481, doi:10.1002/mp.14394.
961. Gerlach, S.; Fürweger, C.; Hofmann, T.; Schlaefel, A. Feasibility and analysis of CNN-based candidate beam generation for robotic radiosurgery. *Med Phys* **2020**, *47*, 3806-3815, doi:10.1002/mp.14331.
962. Sadeghnejad Barkousaraie, A.; Ogunmolu, O.; Jiang, S.; Nguyen, D. A fast deep learning approach for beam orientation optimization for prostate cancer treated with intensity-modulated radiation therapy. *Medical Physics* **2020**, *47*, 880-897, doi:10.1002/mp.13986.
963. Shen, C.; Nguyen, D.; Chen, L.; Gonzalez, Y.; McBeth, R.; Qin, N.; Jiang, S.B.; Jia, X. Operating a treatment planning system using a deep-reinforcement learning-based virtual treatment planner for prostate cancer intensity-modulated radiation therapy treatment planning. *Medical Physics* **2020**, *47*, 2329-2336, doi:10.1002/mp.14114.
964. Xing, Y.; Nguyen, D.; Lu, W.; Yang, M.; Jiang, S. Technical Note: A feasibility study on deep learning-based radiotherapy dose calculation. *Medical Physics* **2020**, *47*, 753-758, doi:10.1002/mp.13953.
965. Xing, Y.; Zhang, Y.; Nguyen, D.; Lin, M.H.; Lu, W.; Jiang, S. Boosting radiotherapy dose calculation accuracy with deep learning. *Journal of Applied Clinical Medical Physics* **2020**, *21*, 149-159, doi:10.1002/acm2.12937.
966. Zhou, J.; Peng, Z.; Song, Y.; Chang, Y.; Pei, X.; Sheng, L.; Xu, X.G. A method of using deep learning to predict three-dimensional dose distributions for intensity-modulated radiotherapy of rectal cancer. *Journal of Applied Clinical Medical Physics* **2020**, *21*, 26-37, doi:10.1002/acm2.12849.
967. Chatterjee, A.; Serban, M.; Faria, S.; Souhami, L.; Cury, F.; Seuntjens, J. Novel knowledge-based treatment planning model for hypofractionated radiotherapy of prostate cancer patients. *Phys Med* **2020**, *69*, 36-43, doi:10.1016/j.ejmp.2019.11.023.
968. Bai, P.; Weng, X.; Quan, K.; Chen, J.; Dai, Y.; Xu, Y.; Lin, F.; Zhong, J.; Wu, T.; Chen, C. A knowledge-based intensity-modulated radiation therapy treatment planning technique for locally advanced nasopharyngeal carcinoma radiotherapy. *Radiation Oncology* **2020**, *15*, doi:10.1186/s13014-020-01626-z.
969. Jensen, P.J.; Zhang, J.; Wu, Q.J. Technical note: Interpolated Pareto surface similarity metrics for multi-criteria optimization in radiation therapy. *Medical Physics* **2020**, *47*, 6450-6457, doi:10.1002/mp.14541.
970. Mistro, M.; Sheng, Y.; Ge, Y.; Kelsey, C.R.; Palta, J.R.; Cai, J.; Wu, Q.; Yin, F.F.; Wu, Q.J. Knowledge Models as Teaching Aid for Training Intensity Modulated Radiation Therapy Planning: A Lung Cancer Case Study. *Frontiers in Artificial Intelligence* **2020**, *3*, doi:10.3389/frai.2020.00066.
971. Virgolin, M.; Wang, Z.; Balgobind, B.V.; Van Dijk, I.W.E.M.; Wiersma, J.; Kroon, P.S.; Janssens, G.O.; Van Herk, M.; Hodgson, D.C.; Zdravcevic Zaletel, L.; et al. Surrogate-free machine learning-based organ dose reconstruction for pediatric abdominal radiotherapy. *Physics in Medicine and Biology* **2020**, *65*, doi:10.1088/1361-6560/ab9fcc.
972. Wagner, A.; Brou Boni, K.; Rault, E.; Crop, F.; Lacornerie, T.; Van Gestel, D.; Reynaert, N. Integration of the M6 Cyberknife in the Moderato Monte Carlo platform and prediction of beam parameters using machine learning. *Physica Medica* **2020**, *70*, 123-132, doi:10.1016/j.ejmp.2020.01.018.
973. Neishabouri, A.; Wahl, N.; Mairani, A.; Köthe, U.; Bangert, M. Long short-term memory networks for proton dose calculation in highly heterogeneous tissues. *Med Phys* **2021**, *48*, 1893-1908, doi:10.1002/mp.14658.
974. Akhavanallaf, A.; Mohammadi, R.; Shiri, I.; Salimi, Y.; Arabi, H.; Zaidi, H. Personalized brachytherapy dose reconstruction using deep learning. *Computers in Biology and Medicine* **2021**, *136*, doi:10.1016/j.compbiomed.2021.104755.
975. Ambroa, E.M.; Pérez-Alíja, J.; Gallego, P. Convolutional neural network and transfer learning for dose volume histogram prediction for prostate cancer radiotherapy. *Med Dosim* **2021**, *46*, 335-341, doi:10.1016/j.meddos.2021.03.005.
976. Bai, T.; Wang, B.; Nguyen, D.; Jiang, S. Deep dose plugin: Towards real-Time Monte Carlo dose calculation through a deep learning-based denoising algorithm. *Machine Learning: Science and Technology* **2021**, *2*, doi:10.1088/2632-2153/abdbfe.
977. Shen, C.; Chen, L.; Gonzalez, Y.; Jia, X. Improving efficiency of training a virtual treatment planner network via knowledge-guided deep reinforcement learning for intelligent automatic treatment planning of radiotherapy. *Med Phys* **2021**, *48*, 1909-1920, doi:10.1002/mp.14712.

978. Stephens, H.; Wu, Q.J.; Wu, Q. Introducing matrix sparsity with kernel truncation into dose calculations for fluence optimization. *Biomed Phys Eng Express* **2021**, *8*, doi:10.1088/2057-1976/ac35f8.
979. Han, E.Y.; Cardenas, C.E.; Nguyen, C.; Hancock, D.; Xiao, Y.; Mumme, R.; Court, L.E.; Rhee, D.J.; Netherton, T.J.; Li, J.; et al. Clinical implementation of automated treatment planning for whole-brain radiotherapy. *Journal of Applied Clinical Medical Physics* **2021**, *22*, 94–102, doi:10.1002/acm2.13350.
980. Hernandez, S.; Sjogreen, C.; Gay, S.S.; Nguyen, C.; Netherton, T.; Olanrewaju, A.; Zhang, L.J.; Rhee, D.J.; Méndez, J.D.; Court, L.E.; et al. Development and dosimetric assessment of an automatic dental artifact classification tool to guide artifact management techniques in a fully automated treatment planning workflow. *Computerized Medical Imaging and Graphics* **2021**, *90*, doi:10.1016/j.compmedimag.2021.101907.
981. Kummanee, P.; Chanchaoen, W.; Tangtisanon, K.; Fuangrod, T. Predicting Three-Dimensional Dose Distribution of Prostate Volumetric Modulated Arc Therapy Using Deep Learning. *Life* **2021**, *11*, doi:10.3390/life11121305.
982. Li, X.; Wang, C.; Sheng, Y.; Zhang, J.; Wang, W.; Yin, F.F.; Wu, Q.; Wu, Q.J.; Ge, Y. An artificial intelligence-driven agent for real-time head-and-neck IMRT plan generation using conditional generative adversarial network (cGAN). *Medical Physics* **2021**, *48*, 2714–2723, doi:10.1002/mp.14770.
983. Lerner, M.; Medin, J.; Jamtheim Gustafsson, C.; Alkner, S.; Olsson, L.E. Prospective Clinical Feasibility Study for MRI-Only Brain Radiotherapy. *Front Oncol* **2021**, *11*, 812643, doi:10.3389/fonc.2021.812643.
984. Martinot, S.; Bus, N.; Vakalopoulou, M.; Robert, C.; Deutsch, E.; Paragios, N. High-Particle Simulation of Monte-Carlo Dose Distribution with 3D ConvLSTMs. **2021**, *12904 LNCS*, 499–508, doi:10.1007/978-3-030-87202-1\_48.
985. Nepf, R.; Lyu, Q.; Huang, Y.; Yang, Y.M.; Sheng, K. DeepMC: a deep learning method for efficient Monte Carlo beamlet dose calculation by predictive denoising in magnetic resonance-guided radiotherapy. *Physics in Medicine and Biology* **2021**, *66*, doi:10.1088/1361-6560/abca01.
986. van de Sande, D.; Sharabiani, M.; Bluemink, H.; Kneepkens, E.; Bakx, N.; Hagelaar, E.; van der Sagen, M.; Theuws, J.; Hurkmans, C. Artificial intelligence based treatment planning of radiotherapy for locally advanced breast cancer. *Phys Imaging Radiat Oncol* **2021**, *20*, 111–116, doi:10.1016/j.phro.2021.11.007.
987. Yu, J.; Goh, Y.; Song, K.J.; Kwak, J.; Cho, B.; Kim, S.S.; Lee, S.W.; Choi, E.K. Feasibility of automated planning for whole-brain radiation therapy using deep learning. *Journal of Applied Clinical Medical Physics* **2021**, *22*, 184–190, doi:10.1002/acm2.13130.
988. Harrer, C.; Ullrich, W.; Wilkens, J.J. Prediction of multi-criteria optimization (MCO) parameter efficiency in volumetric modulated arc therapy (VMAT) treatment planning using machine learning (ML). *Phys Med* **2021**, *81*, 102–113, doi:10.1016/j.ejmp.2020.12.004.
989. Yang, H.J.; Kim, T.H.; Schaarschmidt, T.; Park, D.W.; Kang, S.H.; Chung, H.T.; Suh, T.S. A multivariate approach to determine electron beam parameters for a Monte Carlo 6 MV Linac model: Statistical and machine learning methods. *Phys Med* **2022**, *93*, 38–45, doi:10.1016/j.ejmp.2021.12.005.
990. Lan, G.; Romeijn, E.; Zhou, Z. Conditional gradient methods for convex optimization with general affine and nonlinear constraints. *SIAM Journal on Optimization* **2021**, *31*, 2307–2339, doi:10.1137/20M1352788.
991. McIntosh, C.; Conroy, L.; Tjong, M.C.; Craig, T.; Bayley, A.; Catton, C.; Gospodarowicz, M.; Helou, J.; Isfahanian, N.; Kong, V.; et al. Clinical integration of machine learning for curative-intent radiation treatment of patients with prostate cancer. *Nature Medicine* **2021**, *27*, 999–1005, doi:10.1038/s41591-021-01359-w.
992. Modiri, A.; Vogelius, I.; Ann Rechner, L.; Nygård, L.; Bentzen, S.M.; Specht, L. Outcome-based multiobjective optimization of lymphoma radiation therapy plans. *British Journal of Radiology* **2021**, *94*, doi:10.1259/bjr.20210303.
993. Rezaei, S.M.; Hashemi, B.; Mofid, B.; Bakhshandeh, M.; Mahdavi, A.; Hashemi, M.S. The feasibility of a dose painting procedure to treat prostate cancer based on mpMR images and hierarchical clustering. *Radiation Oncology* **2021**, *16*, doi:10.1186/s13014-021-01906-2.
994. Sheng, Y.; Li, T.; Ge, Y.; Lin, H.; Wang, W.; Yuan, L.; Wu, Q.J. A data-driven approach to optimal beam/arc angle selection for liver stereotactic body radiation therapy treatment planning. *Quant Imaging Med Surg* **2021**, *11*, 4797–4806, doi:10.21037/qims-21-169.
995. Yoo, S.; Sheng, Y.; Blitzblau, R.; McDuff, S.; Champ, C.; Morrison, J.; O'Neill, L.; Catalano, S.; Yin, F.F.; Wu, Q.J. Clinical Experience With Machine Learning-Based Automated Treatment Planning for Whole Breast Radiation Therapy. *Advances in Radiation Oncology* **2021**, *6*, doi:10.1016/j.adro.2021.100656.
